# Supplementary material for: Associations of physician burnout with career engagement and quality of patient care: systematic review and meta-analysis
Source: PubMed Central journal article supplement — BMJ. 2022 Sep 14;378:e070442. doi: 10.1136/bmj-2022-070442 (PMC9472104; doi:10.1136/bmj-2022-070442), 2022-09-14
Supplement: hoda070442.ww.pdf [file hoda070442.ww.pdf]

# Supplementary Appendix

# Association of Burnout with the Career Engagement of Physicians and the Quality of Patient Care: A Systematic Review and Meta-analysis

## Supplementary Appendix

### Contents

|                                                                                          |     |
|------------------------------------------------------------------------------------------|-----|
| <b>Appendix 1: Checklists</b> .....                                                      | 3   |
| <b>Appendix 2: Definition of outcomes</b> .....                                          | 8   |
| <b>Appendix 3: Search Strategy</b> .....                                                 | 10  |
| <b>Appendix 4: Formulae for converting among effect sizes</b> .....                      | 16  |
| <b>Appendix 5: Study Authors Confirming Data</b> .....                                   | 18  |
| <b>Appendix 6: Characteristics of Included Studies</b> .....                             | 22  |
| <b>Appendix 7: Citations for included studies</b> .....                                  | 33  |
| <b>Appendix 8: Subgroup analysis of the different burnout measures used</b> .....        | 47  |
| <b>Appendix 9: NOS Critical Appraisal and Descriptions for Measure of Wellness</b> ..... | 48  |
| <b>Appendix 10: Forest Plots of All Outcomes with Odd Ratio</b> .....                    | 64  |
| <b>Appendix 11: Outcomes analysed using SMD</b> .....                                    | 71  |
| <b>Appendix 12: Meta-Regressions</b> .....                                               | 81  |
| <b>Appendix 13: Publication Bias and Funnel Plots</b> .....                              | 101 |

## Appendix 1: Checklists

### MOOSE Statement - Reporting Checklist for Authors, Editors, and Reviewers of Meta-analyses of Observational Studies

| Reporting Criteria                                                                                              | Reported (Yes/No) | Reported on Page |
|-----------------------------------------------------------------------------------------------------------------|-------------------|------------------|
| <b>Reporting of Background</b>                                                                                  |                   |                  |
| Problem definition                                                                                              | Yes               | 4                |
| Hypothesis statement                                                                                            | Yes               | 5                |
| Description of Study Outcome(s)                                                                                 | Yes               | 5                |
| Type of exposure or intervention used                                                                           | Yes               | 5                |
| Type of study design used                                                                                       | Yes               | 5                |
| Study population                                                                                                | Yes               | 5                |
| <b>Reporting of Search Strategy</b>                                                                             |                   |                  |
| Qualifications of searchers (eg, librarians and investigators)                                                  | Yes               | 5                |
| Search strategy, including time period included in the synthesis and keywords                                   | Yes               | 5-6              |
| Effort to include all available studies, including contact with authors                                         | Yes               | 6                |
| Databases and registries searched                                                                               | Yes               | 5                |
| Search software used, name and version, including special features used (eg, explosion)                         | Yes               | 6                |
| Use of hand searching (eg, reference lists of obtained articles)                                                | Yes               | 6                |
| List of citations located and those excluded, including justification                                           | Yes               | 6                |
| Method for addressing articles published in languages other than English                                        | N/A               | N/A              |
| Method of handling abstracts and unpublished studies                                                            | Yes               | 6                |
| Description of any contact with authors                                                                         | Yes               | 6                |
| <b>Reporting of Methods</b>                                                                                     |                   |                  |
| Description of relevance or appropriateness of studies assembled for assessing the hypothesis to be tested      | Yes               | 6                |
| Rationale for the selection and coding of data (eg, sound clinical principles or convenience)                   | Yes               | 6-7              |
| Documentation of how data were classified and coded (eg, multiple raters, blinding, and interrater reliability) | Yes               | 6-7              |
| Assessment of confounding (eg, comparability of cases and controls in                                           | N/A               | N/A              |

|                                                                                                                                                                                                                                                                              |     |      |
|------------------------------------------------------------------------------------------------------------------------------------------------------------------------------------------------------------------------------------------------------------------------------|-----|------|
| studies where appropriate                                                                                                                                                                                                                                                    |     |      |
| Assessment of study quality, including blinding of quality assessors; stratification or regression on possible predictors of study results YES 5                                                                                                                             | Yes | 7    |
| Assessment of heterogeneity                                                                                                                                                                                                                                                  | Yes | 6-7  |
| Description of statistical methods (eg, complete description of fixed or random effects models, justification of whether the chosen models account for predictors of study results, dose-response models, or cumulative meta-analysis) in sufficient detail to be replicated | Yes | 6-7  |
| Provision of appropriate tables and graphics                                                                                                                                                                                                                                 | Yes | 7    |
| <b>Reporting of Results</b>                                                                                                                                                                                                                                                  |     |      |
| Table giving descriptive information for each study included                                                                                                                                                                                                                 | Yes | 7    |
| Results of sensitivity testing (eg, subgroup analysis)                                                                                                                                                                                                                       | Yes | 10   |
| Indication of statistical uncertainty of findings                                                                                                                                                                                                                            | Yes | 9-10 |
| <b>Reporting of Discussion</b>                                                                                                                                                                                                                                               |     |      |
| Quantitative assessment of bias (eg, publication bias)                                                                                                                                                                                                                       | Yes | 10   |
| Justification for exclusion (eg, exclusion of non-English-language citations)                                                                                                                                                                                                | N/A | N/A  |
| Assessment of quality of included studies                                                                                                                                                                                                                                    | Yes | 8-9  |
| <b>Reporting of Conclusions</b>                                                                                                                                                                                                                                              |     |      |
| Consideration of alternative explanations for observed results                                                                                                                                                                                                               | Yes | 10   |
| Generalization of the conclusions (ie, appropriate for the data presented and within the domain of the literature review)                                                                                                                                                    | Yes | 13   |
| Guidelines for future research                                                                                                                                                                                                                                               | Yes | 13   |
| Disclosure of funding source                                                                                                                                                                                                                                                 | Yes | 3, 7 |

## PRISMA 2020 Checklist

| Section and Topic             | Item # | Checklist item                                                                                                                                                                                                                                                                                       | Location where item is reported (page) |
|-------------------------------|--------|------------------------------------------------------------------------------------------------------------------------------------------------------------------------------------------------------------------------------------------------------------------------------------------------------|----------------------------------------|
| <b>TITLE</b>                  |        |                                                                                                                                                                                                                                                                                                      |                                        |
| Title                         | 1      | Identify the report as a systematic review.                                                                                                                                                                                                                                                          | 1                                      |
| <b>ABSTRACT</b>               |        |                                                                                                                                                                                                                                                                                                      |                                        |
| Abstract                      | 2      | See the PRISMA 2020 for Abstracts checklist.                                                                                                                                                                                                                                                         | 2-3                                    |
| <b>INTRODUCTION</b>           |        |                                                                                                                                                                                                                                                                                                      |                                        |
| Rationale                     | 3      | Describe the rationale for the review in the context of existing knowledge.                                                                                                                                                                                                                          | 4                                      |
| Objectives                    | 4      | Provide an explicit statement of the objective(s) or question(s) the review addresses.                                                                                                                                                                                                               | 5                                      |
| <b>METHODS</b>                |        |                                                                                                                                                                                                                                                                                                      |                                        |
| Eligibility criteria          | 5      | Specify the inclusion and exclusion criteria for the review and how studies were grouped for the syntheses.                                                                                                                                                                                          | 5                                      |
| Information sources           | 6      | Specify all databases, registers, websites, organisations, reference lists and other sources searched or consulted to identify studies. Specify the date when each source was last searched or consulted.                                                                                            | 5-6                                    |
| Search strategy               | 7      | Present the full search strategies for all databases, registers and websites, including any filters and limits used.                                                                                                                                                                                 | 5-6                                    |
| Selection process             | 8      | Specify the methods used to decide whether a study met the inclusion criteria of the review, including how many reviewers screened each record and each report retrieved, whether they worked independently, and if applicable, details of automation tools used in the process.                     | 6                                      |
| Data collection process       | 9      | Specify the methods used to collect data from reports, including how many reviewers collected data from each report, whether they worked independently, any processes for obtaining or confirming data from study investigators, and if applicable, details of automation tools used in the process. | 6                                      |
| Data items                    | 10a    | List and define all outcomes for which data were sought. Specify whether all results that were compatible with each outcome domain in each study were sought (e.g. for all measures, time points, analyses), and if not, the methods used to decide which results to collect.                        | 5-6                                    |
|                               | 10b    | List and define all other variables for which data were sought (e.g. participant and intervention characteristics, funding sources). Describe any assumptions made about any missing or unclear information.                                                                                         | 6-7                                    |
| Study risk of bias assessment | 11     | Specify the methods used to assess risk of bias in the included studies, including details of the tool(s) used, how many reviewers assessed each study and whether they worked independently, and if applicable, details of automation tools used in the process.                                    | 7                                      |
| Effect measures               | 12     | Specify for each outcome the effect measure(s) (e.g. risk ratio, mean difference) used in the synthesis or presentation of results.                                                                                                                                                                  | 6                                      |
| Synthesis methods             | 13a    | Describe the processes used to decide which studies were eligible for each synthesis (e.g. tabulating the study intervention characteristics and comparing against the planned groups for each synthesis (item #5)).                                                                                 | 6-7                                    |
|                               | 13b    | Describe any methods required to prepare the data for presentation or synthesis, such as handling of missing summary statistics, or data conversions.                                                                                                                                                | 6-7                                    |
|                               | 13c    | Describe any methods used to tabulate or visually display results of individual studies and syntheses.                                                                                                                                                                                               | 6-7                                    |
|                               | 13d    | Describe any methods used to synthesize results and provide a rationale for the choice(s). If meta-analysis was performed, describe the model(s), method(s) to identify the presence and extent of statistical heterogeneity, and software package(s) used.                                          | 6-7                                    |
|                               | 13e    | Describe any methods used to explore possible causes of heterogeneity among study results (e.g. subgroup analysis, meta-regression).                                                                                                                                                                 | 6-7                                    |

| Section and Topic             | Item # | Checklist item                                                                                                                                                                                                                                                                       | Location where item is reported (page) |
|-------------------------------|--------|--------------------------------------------------------------------------------------------------------------------------------------------------------------------------------------------------------------------------------------------------------------------------------------|----------------------------------------|
|                               | 13f    | Describe any sensitivity analyses conducted to assess robustness of the synthesized results.                                                                                                                                                                                         | 6-7                                    |
| Reporting bias assessment     | 14     | Describe any methods used to assess risk of bias due to missing results in a synthesis (arising from reporting biases).                                                                                                                                                              | 7                                      |
| Certainty assessment          | 15     | Describe any methods used to assess certainty (or confidence) in the body of evidence for an outcome.                                                                                                                                                                                | 7                                      |
| <b>RESULTS</b>                |        |                                                                                                                                                                                                                                                                                      |                                        |
| Study selection               | 16a    | Describe the results of the search and selection process, from the number of records identified in the search to the number of studies included in the review, ideally using a flow diagram.                                                                                         | 7                                      |
|                               | 16b    | Cite studies that might appear to meet the inclusion criteria, but which were excluded, and explain why they were excluded.                                                                                                                                                          | 7                                      |
| Study characteristics         | 17     | Cite each included study and present its characteristics.                                                                                                                                                                                                                            | 7-8                                    |
| Risk of bias in studies       | 18     | Present assessments of risk of bias for each included study.                                                                                                                                                                                                                         | 9                                      |
| Results of individual studies | 19     | For all outcomes, present, for each study: (a) summary statistics for each group (where appropriate) and (b) an effect estimate and its precision (e.g. confidence/credible interval), ideally using structured tables or plots.                                                     | 8                                      |
| Results of syntheses          | 20a    | For each synthesis, briefly summarise the characteristics and risk of bias among contributing studies.                                                                                                                                                                               | 9                                      |
|                               | 20b    | Present results of all statistical syntheses conducted. If meta-analysis was done, present for each the summary estimate and its precision (e.g. confidence/credible interval) and measures of statistical heterogeneity. If comparing groups, describe the direction of the effect. | 9                                      |
|                               | 20c    | Present results of all investigations of possible causes of heterogeneity among study results.                                                                                                                                                                                       | 9-10                                   |
|                               | 20d    | Present results of all sensitivity analyses conducted to assess the robustness of the synthesized results.                                                                                                                                                                           | 10                                     |
| Reporting biases              | 21     | Present assessments of risk of bias due to missing results (arising from reporting biases) for each synthesis assessed.                                                                                                                                                              | 10                                     |
| Certainty of evidence         | 22     | Present assessments of certainty (or confidence) in the body of evidence for each outcome assessed.                                                                                                                                                                                  | 9-10                                   |
| <b>DISCUSSION</b>             |        |                                                                                                                                                                                                                                                                                      |                                        |
| Discussion                    | 23a    | Provide a general interpretation of the results in the context of other evidence.                                                                                                                                                                                                    | 11                                     |
|                               | 23b    | Discuss any limitations of the evidence included in the review.                                                                                                                                                                                                                      | 12                                     |
|                               | 23c    | Discuss any limitations of the review processes used.                                                                                                                                                                                                                                | 12-13                                  |
|                               | 23d    | Discuss implications of the results for practice, policy, and future research.                                                                                                                                                                                                       | 11-12                                  |
| <b>OTHER INFORMATION</b>      |        |                                                                                                                                                                                                                                                                                      |                                        |
| Registration and protocol     | 24a    | Provide registration information for the review, including register name and registration number, or state that the review was not registered.                                                                                                                                       | 5                                      |
|                               | 24b    | Indicate where the review protocol can be accessed, or state that a protocol was not prepared.                                                                                                                                                                                       | 5                                      |
|                               | 24c    | Describe and explain any amendments to information provided at registration or in the protocol.                                                                                                                                                                                      | N/A                                    |
| Support                       | 25     | Describe sources of financial or non-financial support for the review, and the role of the funders or sponsors in the review.                                                                                                                                                        | 3, 7                                   |
| Competing interests           | 26     | Declare any competing interests of review authors.                                                                                                                                                                                                                                   | 14                                     |

| Section and Topic                              | Item # | Checklist item                                                                                                                                                                                                                             | Location where item is reported (page) |
|------------------------------------------------|--------|--------------------------------------------------------------------------------------------------------------------------------------------------------------------------------------------------------------------------------------------|----------------------------------------|
| Availability of data, code and other materials | 27     | Report which of the following are publicly available and where they can be found: template data collection forms; data extracted from included studies; data used for all analyses; analytic code; any other materials used in the review. | 14                                     |

## Appendix 2: Definition of outcomes

Definitions for the career engagement and quality of patient care outcomes associated with physician burnout and used in this review and meta-analysis.

| Outcome                  | Description                                                                                                                                                                                                                                                                                                                                                                                                                                                                                                                                                                                                                                                                                                                                                                                                                                                              |
|--------------------------|--------------------------------------------------------------------------------------------------------------------------------------------------------------------------------------------------------------------------------------------------------------------------------------------------------------------------------------------------------------------------------------------------------------------------------------------------------------------------------------------------------------------------------------------------------------------------------------------------------------------------------------------------------------------------------------------------------------------------------------------------------------------------------------------------------------------------------------------------------------------------|
| Career Choice Regret     | Includes any of the following: <i>“Would not choose to work in medicine again”, “Strong feeling of wanting to change speciality”, “Would not encourage others to pursue medicine”</i> or <i>“Career as physician came with unmet expectations”</i> .                                                                                                                                                                                                                                                                                                                                                                                                                                                                                                                                                                                                                     |
| Career Development       | Includes any of the following: <i>“Years working in current job (Tenure)”, “Worried about limited job opportunities”, “Adequate time for personal development”</i> or <i>“Proposal of another work post”</i> .                                                                                                                                                                                                                                                                                                                                                                                                                                                                                                                                                                                                                                                           |
| Job Satisfaction         | Job satisfaction includes any of the following: <i>“Career satisfaction”, “practice satisfaction and likes working environment”, “work-engagement”, “finds work rewarding”, “task satisfaction”, “satisfied with workload”, “structural aspects, and humaneness”, “opportunity to consult with peers”, “trusted advisor”, “physician feels they have a good relationship with patients”, “organisational management satisfaction”</i> or <i>“satisfied with decreased working hours”</i> .                                                                                                                                                                                                                                                                                                                                                                               |
| Patient Safety Incidents | <i>“Any unintended events or hazardous conditions resulting from the process of care, rather than due to the patient's underlying disease, that led or could have led to unintended health consequences for the patient or health care processes associated with safety outcomes”</i> <sup>1</sup> . Examples of patient safety incidents are adverse events, adverse drug events, or other therapeutic and diagnostic incidents.                                                                                                                                                                                                                                                                                                                                                                                                                                        |
| Patient Satisfaction     | Patient satisfaction was based on patient-reported measures, such as satisfaction and perceived enablement scores.                                                                                                                                                                                                                                                                                                                                                                                                                                                                                                                                                                                                                                                                                                                                                       |
| Productivity             | Includes: <i>“Absenteeism”, “Intention to reduce working hours”, “Presenteeism or sickness”, “Enjoy coming to work”</i> or <i>“Time off for illness”</i> .                                                                                                                                                                                                                                                                                                                                                                                                                                                                                                                                                                                                                                                                                                               |
| Professionalism          | Professionalism operationalized was based on Stern’s 4 core principles: excellence, accountability, altruism, and humanism <sup>2</sup> . As indicators of low professionalism, we included suboptimal adherence to treatment guidelines (e.g., US Preventive Services Task Force guidelines on prescription of recommended treatments and medications, test-ordering practices, referrals to treatment or other services, and discharge), reduced professional integrity (e.g., malpractice claims), poor communication practices (e.g., provision of suboptimal information to patients), and low empathy. We viewed reduced professionalism as an indicator of suboptimal quality of care and a precursor of patient safety incidents <sup>3</sup> because it involves some type of omission or commission error with potential to result in-patient safety incident. |
| Turnover Intention       | Includes: <i>“Early retirement”, “Intention to change speciality”, “Intention or thoughts of leaving medicine”, “Intention to migrate”, “Intention to quit”, “Considered resigning as physician”</i> or <i>“Litigation with patient”</i> .                                                                                                                                                                                                                                                                                                                                                                                                                                                                                                                                                                                                                               |

<sup>1</sup> Vincent C. *Patient Safety*. Edinburgh, UK: Churchill Livingstone; 2005.

<sup>2</sup> Kanter MH, Nguyen M, Klau MH, Spiegel NH, Ambrosini VL. What does professionalism mean to the physician? *Perm J*. 2013;17(3):87-90. doi:10.7812/TPP/12-120.



<sup>3</sup>Panagioti M, Stokes J, Esmail A, et al. Multimorbidity and patient safety incidents in primary care: a systematic review and meta-analysis. *PLoS One*. 2015;10(8):e0135947. doi:10.1371/journal.pone.0135947

## Appendix 3: Search Strategy

### Ovid Medline 1946 to June 2021

| #  | Terms                                                                                                                                                                        | Number of citations |
|----|------------------------------------------------------------------------------------------------------------------------------------------------------------------------------|---------------------|
| 1  | Internship and Residency/                                                                                                                                                    | 53247               |
| 2  | physician.mp. or exp Physicians/                                                                                                                                             | 358096              |
| 3  | general practitioner.mp. or General Practitioners/                                                                                                                           | 24271               |
| 4  | doctor.mp.                                                                                                                                                                   | 48549               |
| 5  | surgeon*.mp. or Surgeons/                                                                                                                                                    | 184520              |
| 6  | ((intent* adj1 (leave or quit or retir*)).tw.                                                                                                                                | 213                 |
| 7  | Personnel Turnover/                                                                                                                                                          | 5432                |
| 8  | quit*.tw.                                                                                                                                                                    | 116124              |
| 9  | retent*.tw.                                                                                                                                                                  | 160896              |
| 10 | Absenteeism/ or Presenteeism/                                                                                                                                                | 9560                |
| 11 | ((leave or quit) adj2 (practice or patient care or clinical or medical)).tw.                                                                                                 | 641                 |
| 12 | (leaving adj2 (practice or patient care or clinical or medical)).tw.                                                                                                         | 373                 |
| 13 | (retention adj2 (physician* or doctor*)).tw.                                                                                                                                 | 219                 |
| 14 | ((stay or retain) adj2 (physician* or doctor*)).tw.                                                                                                                          | 296                 |
| 15 | ((reduce* or low or decrease*) adj1 (productiv* or work* hours)).mp.                                                                                                         | 2161                |
| 16 | (presenteeism* or absenteism*).mp.                                                                                                                                           | 1279                |
| 17 | (retire* or turnover).mp.                                                                                                                                                    | 116185              |
| 18 | Efficiency/                                                                                                                                                                  | 14225               |
| 19 | Job Satisfaction/                                                                                                                                                            | 26088               |
| 20 | ((job or career or work) adj1 (satisfaction or choice or regret*)).mp.                                                                                                       | 50399               |
| 21 | exp patient safety/                                                                                                                                                          | 22710               |
| 22 | exp adverse drug reaction/                                                                                                                                                   | 121063              |
| 23 | exp iatrogenic disease/                                                                                                                                                      | 78362               |
| 24 | exp medical error/                                                                                                                                                           | 116770              |
| 25 | exp malpractice/                                                                                                                                                             | 31899               |
| 26 | patient safety.tw.                                                                                                                                                           | 25358               |
| 27 | safety culture.tw.                                                                                                                                                           | 1762                |
| 28 | (safe\$ adj2 (practice\$ or manage\$)).tw.                                                                                                                                   | 11639               |
| 29 | iatrogenic disease\$.tw.                                                                                                                                                     | 699                 |
| 30 | malpractice\$.tw.                                                                                                                                                            | 9493                |
| 31 | (patient adj2 harm\$).tw.                                                                                                                                                    | 2000                |
| 32 | human error\$.tw.                                                                                                                                                            | 1982                |
| 33 | ((service\$ or system\$ or communication\$ or organisation\$ or organization\$) adj2 (weak\$ or fail\$)).tw.                                                                 | 9766                |
| 34 | (latent adj1 (threat\$ or cause\$ or fail\$)).tw.                                                                                                                            | 229                 |
| 35 | ((adverse or avoidable or preventable or unsafe or safet\$) adj2 (event\$ or outcome\$ or complication\$ or death\$ or effect\$ or reaction\$ or accident\$ or injur\$)).tw. | 434748              |
| 36 | ((medica\$ or diagnostic or therapeutic or administration or dispensing or prescri\$) adj2 (error\$ or mistake\$ or fault\$)).tw.                                            | 14710               |
| 37 | (patient\$ adj2 (risk\$ or incident\$ or accident\$)).tw.                                                                                                                    | 117645              |
| 38 | near miss\$.tw.                                                                                                                                                              | 2018                |
| 39 | never event\$.tw.                                                                                                                                                            | 309                 |

|           |                                                                                                                                                    |             |
|-----------|----------------------------------------------------------------------------------------------------------------------------------------------------|-------------|
| 40        | untoward incident*.tw.                                                                                                                             | 52          |
| 41        | serious incident*.tw.                                                                                                                              | 192         |
| 42        | serious report* event*.tw.                                                                                                                         | 18          |
| 43        | ((Quality & safety in health care or International Journal for Quality in Health Care).jn. or (Qual Saf Health Care or IJQHC).ja.) and safe\$2.mp. | 934         |
| 44        | polypharmacy/                                                                                                                                      | 5505        |
| 45        | polypharmacy.tw.                                                                                                                                   | 6455        |
| 46        | (patient adj1 satisf*).tw.                                                                                                                         | 32512       |
| 47        | Quality of Health Care/ or quality of care.mp.                                                                                                     | 109295      |
| 48        | Stress, Psychological/ or Burnout, Professional/                                                                                                   | 137017      |
| 49        | burnout.tw.                                                                                                                                        | 10751       |
| 50        | Depression/ or depression.mp.                                                                                                                      | 378633      |
| 51        | Stress, Psychological/                                                                                                                             | 126222      |
| 52        | (emotion* adj distress*).tw.                                                                                                                       | 6258        |
| 53        | (psychological adj distress*).tw.                                                                                                                  | 17847       |
| 54        | or/1-5                                                                                                                                             | 603715      |
| 55        | or/6-20                                                                                                                                            | 457877      |
| 56        | or/21-47                                                                                                                                           | 1035334     |
| 57        | or/48-53                                                                                                                                           | 502990      |
| 58        | 54 and 55 and 57                                                                                                                                   | 2032        |
| 59        | 54 and 56 and 57                                                                                                                                   | 2549        |
| <b>60</b> | <b>58 or 59</b>                                                                                                                                    | <b>4210</b> |

PsycInfo (1806 to July 2021)

| #  | Terms                                                                                                                                                                        | Number of citations |
|----|------------------------------------------------------------------------------------------------------------------------------------------------------------------------------|---------------------|
| 1  | exp Internship Programs/ or exp Medical Internship/ or exp Psychiatrists/ or exp Psychiatric Training/ or exp Psychiatry/                                                    | 66298               |
| 2  | physician.mp. or exp Physicians/                                                                                                                                             | 67199               |
| 3  | general practitioner.mp. or General Practitioners/                                                                                                                           | 8458                |
| 4  | doctor.mp.                                                                                                                                                                   | 14724               |
| 5  | surgeon*.mp. or Surgeons/                                                                                                                                                    | 4274                |
| 6  | Depression/ or depression.mp.                                                                                                                                                | 348003              |
| 7  | burnout.mp. or Burnout, Psychological/                                                                                                                                       | 15328               |
| 8  | (intent* adj1 (leave or quit or retir*)).tw.                                                                                                                                 | 298                 |
| 9  | Personnel Turnover/                                                                                                                                                          | 5541                |
| 10 | quit*.tw.                                                                                                                                                                    | 46850               |
| 11 | retent*.tw.                                                                                                                                                                  | 47054               |
| 12 | Absenteeism/ or Presenteeism/                                                                                                                                                | 2294                |
| 13 | ((leave or quit) adj2 (practice or patient care or clinical or medical)).tw.                                                                                                 | 262                 |
| 14 | (leaving adj2 (practice or patient care or clinical or medical)).tw.                                                                                                         | 118                 |
| 15 | (retention adj2 (physician* or doctor*)).tw.                                                                                                                                 | 60                  |
| 16 | ((stay or retain) adj2 (physician* or doctor*)).tw.                                                                                                                          | 52                  |
| 17 | ((reduce* or low or decrease*) adj1 (productiv* or work* hours)).mp.                                                                                                         | 721                 |
| 18 | (presenteeism* or absenteism*).mp.                                                                                                                                           | 608                 |
| 19 | (retire* or turnover).mp.                                                                                                                                                    | 29714               |
| 20 | Efficiency/                                                                                                                                                                  | 742                 |
| 21 | Job Satisfaction/                                                                                                                                                            | 20350               |
| 22 | ((job or career or work) adj1 (satisfaction or choice or regret*)).mp.                                                                                                       | 30381               |
| 23 | exp patient safety/                                                                                                                                                          | 2383                |
| 24 | exp medical error/                                                                                                                                                           | 2383                |
| 25 | exp malpractice/                                                                                                                                                             | 2141                |
| 26 | patient safety.tw.                                                                                                                                                           | 3994                |
| 27 | safety culture.tw.                                                                                                                                                           | 696                 |
| 28 | (safe\$ adj2 (practice\$ or manage\$)).tw.                                                                                                                                   | 3700                |
| 29 | iatrogenic disease\$.tw.                                                                                                                                                     | 52                  |
| 30 | malpractice\$.tw.                                                                                                                                                            | 1695                |
| 31 | (patient adj2 harm\$).tw.                                                                                                                                                    | 373                 |
| 32 | human error\$.tw.                                                                                                                                                            | 1002                |
| 33 | ((service\$ or system\$ or communication\$ or organisation\$ or organization\$) adj2 (weak\$ or fail\$)).tw.                                                                 | 3796                |
| 34 | (latent adj1 (threat\$ or cause\$ or fail\$)).tw.                                                                                                                            | 66                  |
| 35 | ((adverse or avoidable or preventable or unsafe or safet\$) adj2 (event\$ or outcome\$ or complication\$ or death\$ or effect\$ or reaction\$ or accident\$ or injur\$)).tw. | 46454               |
| 36 | ((medica\$ or diagnostic or therapeutic or administration or dispensing or prescri\$) adj2 (error\$ or mistake\$ or fault\$)).tw.                                            | 2303                |
| 37 | (patient\$ adj2 (risk\$ or incident\$ or accident\$)).tw.                                                                                                                    | 7504                |
| 38 | near miss\$.tw.                                                                                                                                                              | 559                 |
| 39 | never event\$.tw.                                                                                                                                                            | 9                   |
| 40 | untoward incident*.tw.                                                                                                                                                       | 30                  |
| 41 | serious incident*.tw.                                                                                                                                                        | 105                 |

|           |                                                |             |
|-----------|------------------------------------------------|-------------|
| 42        | serious report* event*.tw.                     | 1           |
| 43        | polypharmacy/                                  | 1270        |
| 44        | polypharmacy.tw.                               | 2194        |
| 45        | (patient adj1 satisf*).tw.                     | 5111        |
| 46        | Quality of Health Care/ or quality of care.mp. | 22223       |
| 47        | or/1-5                                         | 133757      |
| 48        | 6 or 7                                         | 361695      |
| 49        | or/8-22                                        | 149161      |
| 50        | or/23-46                                       | 96643       |
| 51        | 47 and 48 and 49                               | 580         |
| 52        | 47 and 48 and 50                               | 988         |
| <b>53</b> | <b>51 or 52</b>                                | <b>1486</b> |

**Embase (1974 to June 2021)**

| #  | Terms                                                                                                                                                                                                                                   | Number of citations |
|----|-----------------------------------------------------------------------------------------------------------------------------------------------------------------------------------------------------------------------------------------|---------------------|
| 1  | residency education/ or medical education/                                                                                                                                                                                              | 249074              |
| 2  | physician.mp. or physician/                                                                                                                                                                                                             | 545620              |
| 3  | general practitioner.mp. or General Practitioner/                                                                                                                                                                                       | 115801              |
| 4  | doctor.mp.                                                                                                                                                                                                                              | 188101              |
| 5  | surgeon*.mp. or Surgeon/                                                                                                                                                                                                                | 382096              |
| 6  | Depression/ or depression.mp.                                                                                                                                                                                                           | 724479              |
| 7  | Stress, Psychological/                                                                                                                                                                                                                  | 75102               |
| 8  | ((emotion* or psychological) adj1 distress*).mp. [mp=title, abstract, heading word, drug trade name, original title, device manufacturer, drug manufacturer, device trade name, keyword, floating subheading word, candidate term word] | 38627               |
| 9  | burnout.mp.                                                                                                                                                                                                                             | 25283               |
| 10 | professional burnout/ or burnout/ or Maslach Burnout Inventory-General Survey/ or Maslach Burnout Inventory/ or Maslach Burnout Inventory-Human Services Survey/                                                                        | 21738               |
| 11 | (intent* adj1 (leave or quit or retir*)).tw.                                                                                                                                                                                            | 277                 |
| 12 | turnover rate/                                                                                                                                                                                                                          | 5222                |
| 13 | quit*.tw.                                                                                                                                                                                                                               | 181428              |
| 14 | retent*.tw.                                                                                                                                                                                                                             | 240589              |
| 15 | Absenteeism/ or Presenteeism/                                                                                                                                                                                                           | 18584               |
| 16 | ((leave or quit) adj2 (practice or patient care or clinical or medical)).tw.                                                                                                                                                            | 932                 |
| 17 | (leaving adj2 (practice or patient care or clinical or medical)).tw.                                                                                                                                                                    | 657                 |
| 18 | (retention adj2 (physician* or doctor*)).tw.                                                                                                                                                                                            | 279                 |
| 19 | ((stay or retain) adj2 (physician* or doctor*)).tw.                                                                                                                                                                                     | 427                 |
| 20 | ((reduce* or low or decrease*) adj1 (productiv* or work* hours)).mp.                                                                                                                                                                    | 3500                |
| 21 | (presenteeism* or absenteeism*).mp.                                                                                                                                                                                                     | 2952                |
| 22 | (retire* or turnover).mp.                                                                                                                                                                                                               | 157798              |
| 23 | productivity/                                                                                                                                                                                                                           | 42389               |
| 24 | Job Satisfaction/                                                                                                                                                                                                                       | 31831               |
| 25 | ((job or career or work) adj1 (satisfaction or choice or regret*)).mp.                                                                                                                                                                  | 37071               |
| 26 | exp patient safety/                                                                                                                                                                                                                     | 136900              |
| 27 | exp adverse drug reaction/                                                                                                                                                                                                              | 555738              |
| 28 | exp iatrogenic disease/                                                                                                                                                                                                                 | 893173              |
| 29 | exp medical error/                                                                                                                                                                                                                      | 148259              |
| 30 | exp malpractice/                                                                                                                                                                                                                        | 32613               |
| 31 | patient safety.tw.                                                                                                                                                                                                                      | 44977               |
| 32 | safety culture.tw.                                                                                                                                                                                                                      | 2951                |
| 33 | (safe\$ adj2 (practice\$ or manage\$)).tw.                                                                                                                                                                                              | 21594               |
| 34 | iatrogenic disease\$.tw.                                                                                                                                                                                                                | 672                 |
| 35 | malpractice\$.tw.                                                                                                                                                                                                                       | 11143               |
| 36 | (patient adj2 harm\$).tw.                                                                                                                                                                                                               | 3869                |
| 37 | human error\$.tw.                                                                                                                                                                                                                       | 3857                |
| 38 | ((service\$ or system\$ or communication\$ or organisation\$ or organization\$) adj2 (weak\$ or fail\$)).tw.                                                                                                                            | 15924               |
| 39 | (latent adj1 (threat\$ or cause\$ or fail\$)).tw.                                                                                                                                                                                       | 360                 |

|    |                                                                                                                                                                              |             |
|----|------------------------------------------------------------------------------------------------------------------------------------------------------------------------------|-------------|
| 40 | ((adverse or avoidable or preventable or unsafe or safet\$) adj2 (event\$ or outcome\$ or complication\$ or death\$ or effect\$ or reaction\$ or accident\$ or injur\$)).tw. | 809015      |
| 41 | ((medica\$ or diagnostic or therapeutic or administration or dispensing or prescri\$) adj2 (error\$ or mistake\$ or fault\$)).tw.                                            | 25346       |
| 42 | (patient\$ adj2 (risk\$ or incident\$ or accident\$)).tw.                                                                                                                    | 227532      |
| 43 | near miss\$.tw.                                                                                                                                                              | 3783        |
| 44 | never event\$.tw.                                                                                                                                                            | 649         |
| 45 | untoward incident*.tw.                                                                                                                                                       | 148         |
| 46 | serious incident*.tw.                                                                                                                                                        | 446         |
| 47 | serious report* event*.tw.                                                                                                                                                   | 26          |
| 48 | ((Quality & safety in health care or International Journal for Quality in Health Care).jn. or (Qual Saf Health Care or IJQHC).ja.) and safe\$2.mp.                           | 1238        |
| 49 | polypharmacy/                                                                                                                                                                | 18699       |
| 50 | polypharmacy.tw.                                                                                                                                                             | 14059       |
| 51 | (patient adj1 satisf*).tw.                                                                                                                                                   | 57165       |
| 52 | Quality of Health Care/ or quality of care.mp.                                                                                                                               | 259429      |
| 53 | or/1-5                                                                                                                                                                       | 1302589     |
| 54 | or/6-10                                                                                                                                                                      | 822902      |
| 55 | or/11-25                                                                                                                                                                     | 664328      |
| 56 | or/26-52                                                                                                                                                                     | 2263498     |
| 57 | 53 and 54 and 55                                                                                                                                                             | 3462        |
| 58 | 53 and 54 and 56                                                                                                                                                             | 6640        |
| 59 | <b>57 or 58</b>                                                                                                                                                              | <b>8284</b> |

## Appendix 4: Formulae for converting among effect sizes

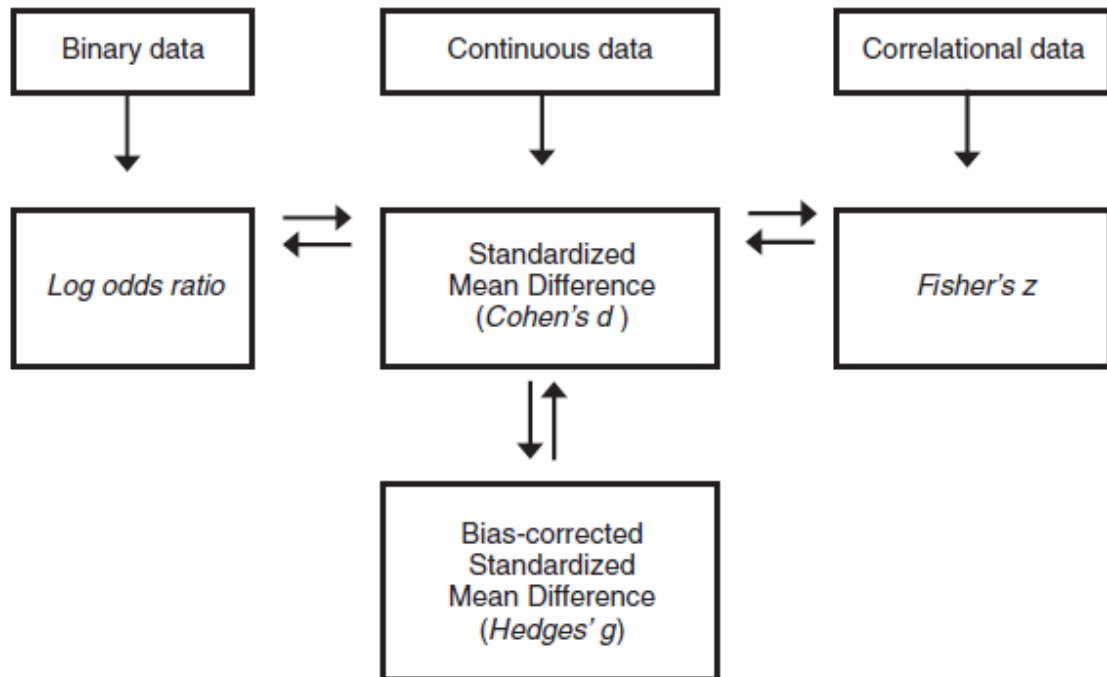

Figure obtained from Introduction to Meta-Analysis. Michael Borenstein, L. V. Hedges, J. P. T. Higgins and H. R. Rothstein © 2009 John Wiley & Sons, Ltd. ISBN: 978-0-470-05724-7

- Converting from effect size Standardised Mean Difference ( $d$ ) to Log Odds Ratio

Log Odd Ratio

$$\text{LogOddsRatio} = d \frac{\pi}{\sqrt{3}}$$

Variance of the Log Odds Ratio

$$V_{\text{LogOddsRatio}} = V_d \frac{\pi^2}{3}$$

- Converting from correlation ( $r$ ) to  $d$

Standardised mean difference ( $d$ )

$$d = \frac{2r}{\sqrt{1-r^2}}$$



Variance of  $d$

$$V_d = \frac{4V_r}{(1 - r^2)^3}$$

Using these formulae, we can conveniently convert 'correlations', 'standardised beta ( $\beta$ ) scores', 'continuous (i.e., effects size (MD/SMD) with the 95% CI or arm level means and SDs)' data to the log odds ratio using the statistical software comprehensive meta-analysis. Cohort (binary) data can be used to simply calculate the log odds and odds ratio effect sizes with their 95% CIs can also easily be converted to the log odds ratio.

## Appendix 5: Study Authors Confirming Data

| Study Author and Date      | Title of Publication                                                                                                                                    | Response | Data Correct |
|----------------------------|---------------------------------------------------------------------------------------------------------------------------------------------------------|----------|--------------|
| Al dubai 2013              | Emotional burnout, perceived sources of job stress, professional fulfillment, and engagement among medical residents in Malaysia                        | Y        | Y            |
| Alrawashdeh 2021           | Occupational burnout and job satisfaction among physicians in times of COVID-19 crisis: a convergent parallel mixed-method study                        | Y        | Y            |
| Baer 2017                  | Pediatric resident burnout and attitudes toward patients                                                                                                | Y        | Y            |
| Bahadirli 2021             | Burnout, job satisfaction, and psychological symptoms among emergency physicians during COVID-19 outbreak: A cross-sectional study                      | Y        | Y            |
| Blanchard 2010             | Prevalence and causes of burnout amongst oncology residents: a comprehensive nationwide cross-sectional study                                           | Y        | Y            |
| Bourne 2019                | Burnout, well-being and defensive medical practice among obstetricians and gynaecologists in the UK: Cross-sectional survey study                       | Y        | Y            |
| Brunsborg 2019             | Association of Pediatric Resident Physician Depression and Burnout With Harmful Medical Errors on Inpatient Services                                    | Y        | Y            |
| Busis 2017                 | Burnout, career satisfaction, and well-being among US neurologists in 2016                                                                              | Y        | Y            |
| Coombs 2019, 2020          | Professional burnout in united states plastic surgery residents: Is it a legitimate concern?                                                            | Y        | Y            |
| Ding 2019                  | Physicians as Teachers and Lifelong Learners                                                                                                            | Y        | Y            |
| Dominguez 2018, 2019       | Taking control: Is job crafting related to the intention to leave surgical training?                                                                    | Y        | Y            |
| Gilles 2014                | Factors associated with healthcare professionals' intent to stay in hospital: A comparison across five occupational categories                          | Y        | Y            |
| Glasheen 2011              | Career satisfaction and burnout in academic hospital medicine                                                                                           | Y        | Y            |
| Golub 2007                 | Burnout in residents of otolaryngology-head and neck surgery: a national inquiry into the health of residency training                                  | Y        | Y            |
| Golub 2008                 | Burnout in academic faculty of otolaryngology-head and neck surgery                                                                                     | Y        | Y            |
| Grover 2018                | Psychological problems and burnout among medical professionals of a tertiary care hospital of North India: A cross-sectional study                      | Y        | Y            |
| Gyorffy 2016               | Workload, mental health and burnout indicators among female physicians                                                                                  | Y        | Y            |
| Gyorffy 2018               | Willingness to migrate-a potential effect of burnout? A survey of Hungarian physicians                                                                  | Y        | Y            |
| Hansen 2011                | General practitioner characteristics and delay in cancer diagnosis. a population-based cohort study                                                     | Y        | Y            |
| Hewitt 2020                | Evaluating the Association of Multiple Burnout Definitions and Thresholds With Prevalence and Outcomes                                                  | Y        | Y            |
| Janko 2019                 | Burnout, depression, perceived stress, and self-efficacy in vascular surgery trainees                                                                   | Y        | Y            |
| Karayurek and Demirci 2021 | Reasons for the relocation of contracted family physicians and job satisfaction                                                                         | Y        | Y            |
| Kelker 2021                | Prospective study of emergency medicine provider wellness across ten academic and community hospitals during the initial surge of the COVID-19 pandemic | Y        | Y            |

|                     |                                                                                                                                                                    |   |   |
|---------------------|--------------------------------------------------------------------------------------------------------------------------------------------------------------------|---|---|
| Kemper 2020         | Burnout in Pediatric Residents: Three Years of National Survey Data                                                                                                | Y | Y |
| Khalafallah 2020a   | Burnout and career satisfaction among attending neurosurgeons during the COVID-19 pandemic                                                                         | Y | Y |
| Khan 2018           | Psychosocial work characteristics, burnout, psychological morbidity symptoms and early retirement intentions: a cross-sectional study of NHS consultants in the UK | Y | Y |
| Klein 2010          | Burnout and perceived quality of care among German clinicians in surgery                                                                                           | Y | Y |
| Kriss 2021          | National Early Career Transplant Hepatologist Survey: Compensation, Burnout, and Job Satisfaction                                                                  | Y | Y |
| Kuerer 2007         | Career satisfaction, practice patterns and burnout among surgical oncologists: report on the quality of life of members of the Society of Surgical Oncology        | Y | Y |
| Kumar 2007          | Burnout and job satisfaction in New Zealand psychiatrists: A national study                                                                                        | Y | Y |
| Kumar 2011          | Stresses experienced by psychiatrists and their role in burnout: A national follow-up study                                                                        | Y | Y |
| Kwah 2016           | The Effect of Burnout on Medical Errors and Professionalism in First-Year Internal Medicine Residents                                                              | Y | Y |
| Lall 2020           | Intention to Leave Emergency Medicine: Mid-career Women Are at Increased Risk                                                                                      | Y | Y |
| Leung 2015          | Stress, satisfaction and burnout amongst Australian and New Zealand radiation oncologists                                                                          | Y | Y |
| Levin 2017          | Burnout, career satisfaction, and well-being among US neurology residents and fellows in 2016                                                                      | Y | Y |
| Linzer 2009         | Working conditions in primary care: physician reactions and care quality                                                                                           | Y | Y |
| Linzer 2017         | Joy In Medical Practice: Clinician Satisfaction In The Healthy Work Place Trial                                                                                    | Y | Y |
| Lu 2015             | Impact of Burnout on Self-Reported Patient Care Among Emergency Physicians                                                                                         | Y | Y |
| McAbee 2015         | Factors associated with career satisfaction and burnout among US neurosurgeons: results of a nationwide survey                                                     | Y | Y |
| Mehta 2019          | Burnout and Career Satisfaction Among U.S. Cardiologists                                                                                                           | Y | Y |
| Messerotti 2020     | Investigating the association between physicians self-efficacy regarding communication skills and risk of "burnout"                                                | Y | Y |
| Mohammed 2018       | Job satisfaction and burnout among Iraqi physicians: Insight from university hospital surveys                                                                      | Y | Y |
| Moreno-Jimenez 2012 | A study of physicians' intention to quit: the role of burnout, commitment and difficult doctor-patient interactions                                                | Y | Y |
| Ochoa 2018          | Impact of burnout on organizational outcomes, the influence of legal demands: The case of Ecuadorian physicians                                                    | Y | Y |
| O'Connor 2017       | A longitudinal and multicentre study of burnout and error in Irish junior doctors                                                                                  | Y | Y |
| O'Connor 2019       | Internal Medicine Residency Program Director Burnout and Program Director Turnover: Results of a National Survey                                                   | Y | Y |
| Park 2016           | A Multicenter Study Investigating Empathy and Burnout Characteristics in Medical Residents with Various Specialties                                                | Y | Y |
| Pit 2014, 2016      | Factors influencing early retirement intentions in Australian rural general practitioners                                                                          | Y | Y |
| Prins 2009          | Burnout, engagement and resident physicians' self-reported errors                                                                                                  | Y | Y |
| Qureshi 2015        | Burnout phenomenon in U.S. plastic surgeons: risk factors and impact on quality of life                                                                            | Y | Y |
| Rabatin 2016        | Predictors and Outcomes of Burnout in Primary Care Physicians                                                                                                      | Y | Y |

|                          |                                                                                                                                                                             |   |   |
|--------------------------|-----------------------------------------------------------------------------------------------------------------------------------------------------------------------------|---|---|
| Roy 2017                 | Relationships of work characteristics to job satisfaction, turnover intention, and burnout among doctors in the district public private mixed health system of Bangladesh   | Y | Y |
| Salles 2019              | Social Belonging as a Predictor of Surgical Resident Well-being and Attrition                                                                                               | Y | Y |
| Schaufeli 2009           | Workaholism, burnout and well-being among junior doctors: The mediating role of role conflict                                                                               | Y | Y |
| Sinsky 2017              | Professional Satisfaction and the Career Plans of US Physicians                                                                                                             | Y | Y |
| Sliwa 2019               | Burnout in Diplomates of the American Board of Physical Medicine and Rehabilitation-Prevalence and Potential Drivers: A Prospective Cross-Sectional Survey                  | Y | Y |
| Sonmez 2021              | Occupational burnout, job satisfaction and anxiety among emergency medicine doctors in Turkey                                                                               | Y | Y |
| Sulaiman 2017            | Burnout syndrome among non-consultant hospital doctors in Ireland: relationship with self-reported patient care                                                             | Y | Y |
| Surgenor 2009            | Burnout in hospital-based medical consultants in the New Zealand public health system                                                                                       | Y | Y |
| Tak 2017                 | Association of Intrinsic Motivating Factors and Markers of Physician Well-Being: A National Physician Survey                                                                | Y | Y |
| Tawfik 2018              | Physician Burnout, Well-being, and Work Unit Safety Grades in Relationship to Reported Medical Errors                                                                       | Y | Y |
| Taycan 2012              | The impact of compulsory health service on physicians and burnout in a province in Eastern Anatolia                                                                         | Y | Y |
| Tokuda 2009              | The interrelationships between working conditions, job satisfaction, burnout and mental health among hospital physicians in Japan: a path analysis                          | Y | Y |
| Torres 2015              | Association between Sick Leave Prescribing Practices and Physician Burnout and Empathy                                                                                      | Y | Y |
| Umene-Nakano 2013        | Nationwide survey of work environment, work-life balance and burnout among psychiatrists in Japan                                                                           | Y | Y |
| Vanhaecht 2019           | Duration of second victim symptoms in the aftermath of a patient safety incident and association with the level of patient harm: a cross-sectional study in the Netherlands | Y | Y |
| vanWulfftenPalthe 2016   | Among Musculoskeletal Surgeons, Job Dissatisfaction Is Associated With Burnout                                                                                              | Y | Y |
| Walocha 2013             | Empathy and burnout among physicians of different specialities                                                                                                              | Y | Y |
| Ward 2020                | Family Physician Burnout Does Not Differ With Rurality                                                                                                                      | Y | Y |
| Watson 2018              | Impact of physician workload on burnout in the emergency department                                                                                                         | Y | Y |
| Weigl 2015               | Associations of work characteristics, employee strain and self-perceived quality of care in Emergency Departments: A cross-sectional study                                  | Y | Y |
| Weigl & Schneider (2017) | Associations of work characteristics, employee strain and self-perceived quality of care in Emergency Departments: A cross-sectional study                                  | Y | Y |
| Weng 2011                | Associations between emotional intelligence and doctor burnout, job satisfaction and patient satisfaction                                                                   | Y | Y |
| West 2006                | Association of perceived medical errors with resident distress and empathy: a prospective longitudinal study                                                                | Y | Y |
| West 2009                | Association of resident fatigue and distress with perceived medical errors                                                                                                  | Y | Y |
| Whitebird 2017           | Clinician burnout and satisfaction with resources in caring for complex patients                                                                                            | Y | Y |

|                    |                                                                                                                                                                      |   |   |
|--------------------|----------------------------------------------------------------------------------------------------------------------------------------------------------------------|---|---|
| Willard-Grace 2019 | Burnout and Health Care Workforce Turnover                                                                                                                           | Y | Y |
| Williams 2007      | The relationship of organizational culture, stress, satisfaction, and burnout with physician-reported error and suboptimal patient care: results from the MEMO study | Y | Y |
| Wright 2011        | Burnout among faculty physicians in an academic health science centre                                                                                                | Y | Y |
| Xiao 2014          | Psychological distress, burnout level and job satisfaction in emergency medicine: A cross-sectional study of physicians in China                                     | Y | Y |
| Yost 2014          | Burnout among osteopathic otolaryngology residents: identification during formative training years                                                                   | Y | Y |
| Zhou 2017          | Burnout, psychological morbidity, job stress, and job satisfaction in Chinese neurologists                                                                           | Y | Y |

## Appendix 6: Characteristics of Included Studies

### Study setting and physician characteristics.

| Study                | Country      | Healthcare setting                                                           | Research design    | Sample size | Age                                                                                | Mean/Median Age* | Males (%)                                  | Speciality of physician*   | Years of Experience as reported                                                    | Working experience* |
|----------------------|--------------|------------------------------------------------------------------------------|--------------------|-------------|------------------------------------------------------------------------------------|------------------|--------------------------------------------|----------------------------|------------------------------------------------------------------------------------|---------------------|
| Adarkwah 2018        | Germany      | Primary care                                                                 | Cross-Sectional    | 85          | Mean: 53.5                                                                         | 53.5             | 75.30%                                     | GPs                        | Experienced                                                                        | Experienced         |
| Al-Dubai 2013        | Malaysia     | Hospital                                                                     | Cross-Sectional    | 191         | 65.4% were aged between 25-27                                                      | n/r              | 44.50%                                     | Interns/Residents          | Residents                                                                          | Resident            |
| Alrawashdeh 2021     | Jordan       | Mixed                                                                        | Cross-Sectional    | 973         | Mean: 34.6 (SD 9.9)                                                                | 34.6             | 69.80%                                     | Mixed                      | Mixed                                                                              | Mixture             |
| Anagnostopoulos 2012 | Greece       | Primary care                                                                 | Cross-Sectional    | 30          | Median: 48, range of 36-50 yrs.                                                    | 48               | 85%                                        | GPs                        | n/r                                                                                | n/r                 |
| Appelbaum 2019       | US           | hospital                                                                     | Cross-Sectional    | 166         | n/r                                                                                | n/r              | 63%                                        | Surgery                    | Residents                                                                          | Resident            |
| Arora 2014           | Australia    | hospital                                                                     | Cross-Sectional    | 51          | n/r                                                                                | n/r              | 86%                                        | Surgery                    | Registrars/Residents                                                               | Resident            |
| Asai 2008            | US           | End of life care (Hospitals and cancer centres)                              | Cross-Sectional    | 697         | Mean: 45 (SD 8.2)                                                                  | 45               | 92%                                        | Cancer                     | Mean: 16 (SD 8.1)                                                                  | Experienced         |
| Attenello 2018       | US           | Hospital                                                                     | Cross-Sectional    | 395         | Mode: 26-30                                                                        | n/r              | 78%                                        | Neurosurgery               | Residents                                                                          | Resident            |
| Baer 2017            | US           | Paediatric residents                                                         | Cross-Sectional    | 258         | Mean: 29 (SD 2.3)                                                                  | 29               | 21%                                        | Paediatrics                | 35% postgraduate year [PGY] -1, 34% PGY-2, and 31% PGY-3                           | Resident            |
| Baghdadi 2020        | Saudi Arabia | Hospital                                                                     | Cross-Sectional    | 136         | 64 (47%) were aged 25-34.                                                          | n/r              | 70%                                        | Mixed                      | n/r                                                                                | n/r                 |
|                      |              |                                                                              |                    |             | 43 (32%) were 35-44.                                                               |                  |                                            |                            |                                                                                    |                     |
|                      |              |                                                                              |                    |             | 19 (14%) were 45-54.                                                               |                  |                                            |                            |                                                                                    |                     |
|                      |              |                                                                              |                    |             | 10 (7%) were 55-65 (no mean provided)                                              |                  |                                            |                            |                                                                                    |                     |
| Bahadirli 2021       | Turkey       | Emergency department                                                         | Cross-Sectional    | 331         | Median: 29 (Range 27-35)                                                           | 29               | 57%                                        | Emergency medicine & ICU   | Median: 5 yrs. (Range 2-10 yrs.), 46.2% residents                                  | Mixture             |
| Balch 2011           | US           | Survey based on registration to the American College of Surgeons (Hospitals) | Cross-Sectional    | 7164        | mean age for private: 51 yrs. and for academic: 50 yrs.                            | 50.5             | 89% private, 83.5% academic                | Surgery                    | Median: 20 (Range 10 to 28) yrs.                                                   | Experienced         |
| Blanchard 2010       | France       | Hospital                                                                     | Cross-Sectional    | 204         | Mean: 28 yrs.                                                                      | 28               | 40%                                        | Cancer                     | Residents                                                                          | Resident            |
| Bourne 2019          | UK           | Hospital                                                                     | Cross-Sectional    | 3102        | Mean age for each category: 50 yrs. Consultants, 33 yrs. Trainees, and 47 yrs. SAS | n/r              | Consultant: 58%,<br>Trainee: 80%, SAS: 68% | Obstetrics and gynaecology | Mixed (Trainees, SAS and Consultants)                                              | Mixture             |
| Bressi 2009          | Italy        | Hospital                                                                     | Cross-Sectional    | 91          | Mean: 47 yrs.                                                                      | 47               | 42%                                        | Psychiatry                 | Experienced                                                                        | Experienced         |
| Brown 2009           | Australia    | Hospitals                                                                    | Cross-Sectional    | 24          | Mean: 42 (SD 8) yrs.                                                               | 42               | 60%                                        | Mixed                      | Novices: 1-3 years; Experts: over 3 years (70% had more than 10 years' experience) | Experienced         |
| Brunsborg 2019       | US           | Paediatric academic centres                                                  | Prospective Cohort | 388         | Mean: 28.4 yrs.                                                                    | 28.4             | 30%                                        | Paediatrics                | Paediatric residents                                                               | Resident            |

|                      |           |                               |                                                         |       |                                                                                                                   |      |                                 |                          |                                                                                           |             |
|----------------------|-----------|-------------------------------|---------------------------------------------------------|-------|-------------------------------------------------------------------------------------------------------------------|------|---------------------------------|--------------------------|-------------------------------------------------------------------------------------------|-------------|
| Busis 2017           | US        | Hospital                      | Cross-Sectional                                         | 1671  | Median: 51 yrs.                                                                                                   | 51   | 65.30%                          | Neurology                | Mixed                                                                                     | Mixture     |
| Campbell 2001        | US        | Hospital                      | Cross-Sectional                                         | 582   | Mean age 50-51 depending on category                                                                              | 50.5 | 92-96%                          | Surgery                  | Experienced                                                                               | Experienced |
| Chen 2013            | Taiwan    | Several settings              | Cross-Sectional                                         | 839   | Mean: 36; 58% were up to 40 years and 42% were above 40 years                                                     | 36   | 79%                             | Mixed                    | n/r                                                                                       | n/r         |
|                      |           |                               |                                                         |       | 26 to 30: yrs. 170, (37%)                                                                                         |      |                                 |                          |                                                                                           |             |
|                      |           |                               |                                                         |       | 31 to 35: yrs. 241, (52%)                                                                                         |      |                                 |                          |                                                                                           |             |
|                      |           |                               |                                                         |       | 36 to 40: yrs. 46, (10%)                                                                                          |      |                                 |                          |                                                                                           |             |
|                      |           |                               |                                                         |       | 40 to 45: yrs. 5, (1%)                                                                                            |      |                                 |                          |                                                                                           |             |
| Cooke 2013           | Australia | Primary care (GP registrars)  | Cross-Sectional                                         | 128   | Mean: 35; 85% up to 39 years and 15% over 40 years                                                                | 35   | 33%                             | GPs                      | n/r                                                                                       | n/r         |
| Cydulka 2008         | US        | Hospital                      | Prospective Cohort                                      | 945   | Mean: 49.9 yrs. in 2004                                                                                           | 49.9 | 86.2 in 2004                    | Emergency medicine & ICU | Experienced                                                                               | Experienced |
| de Oliveira 2013     | US        | Hospitals                     | Cross-Sectional                                         | 1508  | Mean: 33 yrs.                                                                                                     | 33   | 54%                             | Anaesthesiology          | Anaesthesiology trainees                                                                  | Resident    |
| Dewa 2014            | Canada    | Mixed- hospital and community | Cross-Sectional (economic evaluation using survey data) | 70700 | means by grp: <45yrs: FP: 38, S: 39, OS: 38; 45-54yrs: FP: 50, S: 49, OS: 50; grp 55-64yrs: FP: 59, S: 59, OS: 59 | n/r  | Unclear                         | Mixed                    | n/r                                                                                       | n/r         |
| Ding 2019            | Canada    | Mixed- hospital and community | Cross-Sectional                                         | 202   | Mode: 25-39                                                                                                       | n/r  | 34%                             | Mixed                    | n/r                                                                                       | n/r         |
|                      |           |                               |                                                         |       | 16% are 24-29 years old,                                                                                          |      |                                 |                          | 15.5% have 2-3 years of experience,                                                       |             |
|                      |           |                               |                                                         |       | 22% are 30-38 years old,                                                                                          |      |                                 |                          | 21.5% have 4-6 years of experience,                                                       |             |
|                      |           |                               |                                                         |       | 36% are 39-47 years old,                                                                                          |      |                                 |                          | 24% have 7-9 years of experience,                                                         |             |
|                      |           |                               |                                                         |       | 18% are 48-55 years old,                                                                                          |      |                                 |                          | 37.5% have 10 years or more experience as a physician                                     |             |
|                      |           |                               |                                                         |       | 4.5% are 56 years old and above                                                                                   |      |                                 |                          |                                                                                           |             |
| Dirvar 2021          | Turkey    | Hospital                      | Cross-Sectional                                         | 353   | n/r                                                                                                               | n/r  | 98.60%                          | Surgery                  | Experienced                                                                               | Experienced |
| Djulgovic 2019       | US        | Internal medicine programme   | Cross-Sectional                                         | 166   | Median: 29 yrs.                                                                                                   | 29   | 52                              | Internal medicine        | Trainees                                                                                  | Resident    |
| Doan-Wiggans 1995    | US        | Hospital                      | Cross-Sectional                                         | 785   | Mean: 37.1/42.5 yrs. depending on category                                                                        | n/r  | 87.1%/91% depending on category | Emergency medicine & ICU | Experienced                                                                               | Experienced |
| Dominguez 2018, 2019 | Columbia  | Surgery                       | Cross-Sectional                                         | 202   | Mean: 28 yrs.                                                                                                     | 28   | 63.90%                          | Surgery                  | Residents                                                                                 | Resident    |
| Duan 2019            | China     | Hospitals                     | Cross-Sectional                                         | 1257  | Majority (64.7%) were aged between 31-50 yrs.; 27.4% were below 31 yrs. and 7.9% were above 50 yrs.               | n/r  | 54%                             | Physician                | Mostly experienced (37.3% above 11 yrs.); 29.6% between 5-10 yrs.; 33.1% less than 5 yrs. | Experienced |
| Estry-Behar 2011     | France    | Emergency physician           | Cross-Sectional                                         | 3196  | <35yrs. = 25%; 35-44yrs. = 33.8%; 45-54yrs. = 34.5%; >= 55yrs. = 23.6%                                            | n/r  | 58%                             | Emergency medicine & ICU | Mixed                                                                                     | Mixture     |

|                       |             |                                                   |                      |      |                                                                                                       |      |        |                            |                                                |             |
|-----------------------|-------------|---------------------------------------------------|----------------------|------|-------------------------------------------------------------------------------------------------------|------|--------|----------------------------|------------------------------------------------|-------------|
| Faivre 2018           | France      | Hospital                                          | Cross-Sectional      | 107  | <= 25yrs. = 13%; 25-29yrs. = 75%; >= 30yrs. = 12%                                                     | n/r  | 65%    | Surgery                    | Residents with at least 6/12 of training       | Experienced |
| Fahrenkopf 2008       | US          | Hospitals                                         | Prospective Cohort   | 123  | Mean: 29 yrs.; 62% were up to 30 yrs. and 38% over 30 yrs.                                            | 29   | 30%    | Paediatrics                | Residents in paediatrics (1-3 yrs. experience) | Resident    |
| Freeborn 2001         | US          | Mixed                                             | Prospective Cohort   | 526  | n/r                                                                                                   | n/r  | n/r    | Mixed                      | Mixture                                        | Mixture     |
| Garrouste-Orgeas 2015 | France      | Intensive Care Units                              | Prospective Cohort   | 540  | Median: 33 (Range 28-44) yrs.                                                                         | 33   | 58%    | Emergency medicine & ICU   | n/r                                            | n/r         |
| Gilles 2014           | Switzerland | Mixed                                             | Cross-Sectional      | 5013 | <30 yrs. = 18.1; 30-39 yrs. = 25.9; 40-49 yrs. = 24.1; >=50 yrs. = 23.6                               | n/r  | 27%    | Mixed                      | 34.4% >10 yrs.                                 | Experienced |
| Glasheen 2011         | US          | Academic medical centres                          | Cross-Sectional      | 266  | 70% aged between 31 and 40 yrs.                                                                       | n/r  | 54%    | Internal medicine          | Internal medicine                              | Experienced |
| Goldberg 1996         | US          | Emergency physician                               | Cross-Sectional      | 1272 | 47% between ages 30 to 39 yrs.; 35% between ages 40 to 49 yrs.                                        | n/r  | 74%    | Emergency medicine & ICU   | 38% between 0 to 5 yrs.                        | Experienced |
| Golub 2007            | US          | Mixed                                             | Cross-Sectional      | 1364 | Mean: 31 (Range 24-45) yrs.                                                                           | 31   | 79%    | Academics                  | Mixture                                        | Mixture     |
| Golub 2008            | US          | Mixed                                             | Cross-Sectional      | 514  | Mean: 52 (range 33-87) yrs.                                                                           | 52   | 87%    | Academics                  | 19 (5-51) yrs.                                 | Experienced |
| Govardhan 2012        | US          | Obstetrics and gynaecology residents              | Cross-Sectional      | 57   | Mean: 30.1 (SD 3) yrs.                                                                                | 30.1 | 8.80%  | Obstetrics and gynaecology | Mixture                                        | Mixture     |
| Grover 2018           | India       | Resident and faculty members in a tertiary centre | Cross-Sectional      | 445  | Mean: 31.6 (SD-7.45) yrs.                                                                             | 31.6 | 69.20% | Mixed                      | Residents and faculty members                  | Resident    |
| Gyorffy 2016, 2018    | Hungary     | Mixed (members of medical chamber)                | Cross-Sectional      | 5607 | Mean: 45.1 yrs.                                                                                       | 45.1 | 0%     | Mixed                      | n/r                                            | n/r         |
| Halbesleben 2008      | US          | Hospital                                          | Cross-Sectional      | 178  | Mean: 45.70 (SD 12.99) yrs.                                                                           | 45.7 | 47%    | Mixed                      | Mixed                                          | Mixture     |
| Hamidi 2018           | US          | Hospital                                          | Retrospective Cohort | 472  | n/r                                                                                                   | n/r  | n/r    | Physician                  | Mixed                                          | Mixture     |
| Hansen 2011           | Denmark     | Primary Care                                      | Cross-Sectional      | 334  | n/r                                                                                                   | n/r  | 70%    | GPs                        | GPs                                            | Experienced |
| Hartwell 2010         | US          | Hospital                                          | Cross-Sectional      | 94   | Mean: 40 (SD 5.12) yrs.                                                                               | 40   | 0%     | Physician                  | Mean: 10 yrs.                                  | Experienced |
| Hayashino 2012        | Japan       | Hospital                                          | Prospective Cohort   | 836  | Mean: 46 yrs.; 23% were up to 39 years, 47% were in the age range of 40-49 and 30% were above 50 yrs. | 46   | 92%    | Mixed                      | n/r                                            | n/r         |
| Hewitt 2020           | US          | General surgery residents - hospital              | Cross-Sectional      | 6956 | n/r                                                                                                   | n/r  | 57%    | Surgery                    | Less than 6 years still resident training      | Resident    |
| Huang 2019            | Taiwan      | Hospital                                          | Cross-Sectional      | 1014 | 66.6% between 20 to 30 yrs.                                                                           | n/r  | 71.90% | Mixed                      | Residents (mostly R1 to R3)                    | Resident    |
| Hyman 2017            | US          | Mostly hospital (community or teaching)           | Cross-Sectional      | 266  | Mostly above 40 yrs. (83.1%)                                                                          | n/r  | 74.10% | Physician                  | n/r                                            | n/r         |
| Jager 2017            | US          | Mixed                                             | Cross-Sectional      | 2263 | Mean: 52.6 (SD 11.2) yrs.                                                                             | 52.6 | 67.50% | Mixed                      | n/r                                            | n/r         |
| Janko 2019            | US          | Surgeons in hospital                              | Cross-Sectional      | 177  | Mean: 32 yrs.                                                                                         | 32   | 64%    | Surgery                    | Mixed                                          | Mixture     |
| Kang 2013             | Korea       | Hospitals                                         | Cross-Sectional      | 86   | 78% were up to 30 yrs. and 22% over 30 yrs.                                                           | n/r  | 74%    | Interns/Residents          | n/r                                            | n/r         |
| Karaoglu 2015         | Turkey      | Hospital                                          | Cross-Sectional      | 74   | Mean: 27.60 (SD 2.25) yrs.                                                                            | 27.6 | 41%    | Paediatrics                | n/r                                            | n/r         |



|                            |         |                                                                                                                            |                    |      |                                                                                                                                                             |      |                                             |                            |                                                                                                                                                                                                                                                                   |             |
|----------------------------|---------|----------------------------------------------------------------------------------------------------------------------------|--------------------|------|-------------------------------------------------------------------------------------------------------------------------------------------------------------|------|---------------------------------------------|----------------------------|-------------------------------------------------------------------------------------------------------------------------------------------------------------------------------------------------------------------------------------------------------------------|-------------|
| Karayurek and Demirci 2021 | Turkey  | Primary care                                                                                                               | Cross-Sectional    | 407  | Mean: 48 yrs.                                                                                                                                               | 48   | 67%                                         | GPs                        | n/r                                                                                                                                                                                                                                                               | n/r         |
| Kassam 2021                | US      | Hospital                                                                                                                   | Cross-Sectional    | 77   | Median: 34 (IQR 33-37) yrs.                                                                                                                                 | 34   | 65%                                         | Surgery                    | Fellows                                                                                                                                                                                                                                                           | Experienced |
| Kelker 2021                | US      | Emergency departments                                                                                                      | Prospective Cohort | 231  | Mean = 40.8 (SD: 9.39) yrs.                                                                                                                                 | 40.8 | 40%                                         | Emergency medicine & ICU   | 42% 1-5 yrs.; 29% over 16 yrs.                                                                                                                                                                                                                                    | Mixture     |
| Kemper 2020                | US      | Paediatric departments                                                                                                     | Cross-Sectional    | 9653 | Yr. 2016: mean 29.3 (SD 3.3) yrs.; yr. 2017: mean 29 (SD 2.4) yrs.; yr. 2018: mean 29 (SD 2.5) yrs.                                                         | 29   | Yr. 2016: 28%; Yr. 2017: 27%; Yr. 2018: 26% | Paediatrics                | Residents                                                                                                                                                                                                                                                         | Resident    |
| Khalafallah 2020a          | US      | Participants were non-resident neurosurgeons from both academic and non-academic institutions who were members of the AANS | Cross-Sectional    | 407  | No mean or median age reported. 10% were 30-40; 29% were 40-50; 36% were 50-60; 22% were 60-70 and 2% were over 70.                                         | n/r  | 89%                                         | Neurosurgery               | Experienced: Attending neurosurgeons (65% over 15 years of experience)                                                                                                                                                                                            | Experienced |
| Khan 2018                  | UK      | 12 NHS Hospital Trusts in Wales                                                                                            | Cross-Sectional    | 593  | No mean or median age reported. 20% of participants were 30-40; 46% were 41-50; 31% were 51-60 and 4% were 60+                                              | n/r  | 63%                                         | Mixed                      | Experienced: All consultants                                                                                                                                                                                                                                      | Experienced |
| Khorfan 2021               | US      | Resident's training surgery at Hospital                                                                                    | Cross-Sectional    | 6956 | n/r                                                                                                                                                         | n/r  | 57%                                         | Surgery                    | Unclear but less than 6 yrs. with being postgraduate                                                                                                                                                                                                              | Resident    |
| Kimo Takayesu 2014         | US      | Emergency residents in eight programs in Northeast, Midwest and Southern US were invited to participate.                   | Cross-Sectional    | 218  | No mean or median age reported. 53% of participants were 25-29; 34% of participants were 30-34; 10% of participants were 35-39; 4% of participants were 40+ | n/r  | 59%                                         | Emergency medicine & ICU   | Residents                                                                                                                                                                                                                                                         | Resident    |
| Klein 2010                 | Germany | General hospitals                                                                                                          | Cross-Sectional    | 1311 | n/r                                                                                                                                                         | n/r  | 60%                                         | Obstetrics and gynaecology | Mean: 11.4 yrs.                                                                                                                                                                                                                                                   | Experienced |
| Koleck 2000                | France  | General practitioners in an urban community setting                                                                        | Cross-Sectional    | 226  | n/r                                                                                                                                                         | n/r  | 100%                                        | GPs                        | n/r                                                                                                                                                                                                                                                               | n/r         |
| Kriss 2021                 | US      | Hospital                                                                                                                   | Cross-Sectional    | 256  | University hospital clinical: 38 (36-40) yrs.; non-University hospital clinical: 39 (37-41) yrs.; Research: 39 (36-40) yrs.                                 | n/r  | 51-60%                                      | Surgery                    | Only 4/5 years across groups                                                                                                                                                                                                                                      | Resident    |
| Kuerer 2007                | US      | 72% of participants worked in an academic practice setting; 27% worked in private practice                                 | Cross-Sectional    | 549  | No mean or median age reported. 23% were under 40 yrs.; 44% were 40-50 yrs.; 23% were 51-60 yrs.; 10% were over 60 yrs..                                    | n/r  | 80%                                         | Surgery                    | Mostly experienced. 11% had completed less than 2 years since training; 16% had completed 2-5 years since training; 17% had completed 6-10 years since training; 32% had completed 11-20 years since training and 24% had completed over 20 years since training. | Experienced |
| Kuhn 2009                  | US      | Emergency department                                                                                                       | Cross-Sectional    | 193  | Median: 41 (IQR = 36-51) yrs.                                                                                                                               | 41   | 72%                                         | Emergency medicine & ICU   | Mean years practising in Emergency                                                                                                                                                                                                                                | Experienced |

|                 |                           |                                                                                                                                                                                               |                     |      |                                                                                                                                                |      |        |                          |                                                                                                                                                                                                                      |             |
|-----------------|---------------------------|-----------------------------------------------------------------------------------------------------------------------------------------------------------------------------------------------|---------------------|------|------------------------------------------------------------------------------------------------------------------------------------------------|------|--------|--------------------------|----------------------------------------------------------------------------------------------------------------------------------------------------------------------------------------------------------------------|-------------|
|                 |                           |                                                                                                                                                                                               |                     |      |                                                                                                                                                |      |        |                          | Medicine: 12.3 (SD 8.6) yrs.                                                                                                                                                                                         |             |
| Kumar 2007      | New Zealand               | Psychiatry but specific health setting not reported. Could be assumed that as psychiatrists are specialists, this would not be primary care.                                                  | Cross-Sectional     | 239  | Mean and median age not reported. 18% were 40 yrs. and under. 48% were 41-50 yrs., 23% were 51-60 yrs. 9% were 61-70 yrs. 3% were over 70 yrs. | n/r  | 63%    | Psychiatry               | 18% had been practising for 10 years or less. 43% had been practising for 11-20 years. 28% had been practising for 21-30 years. 9% had been practising for 31-40 years and 2% had been practising for over 40 years. | Experienced |
| Gupta 2018      | US                        | Multiple settings                                                                                                                                                                             | Cross-Sectional     | 5782 | No overall mean reported                                                                                                                       | n/r  | 0%     | Mixed                    | Mostly experienced physicians (89.9%)                                                                                                                                                                                | Experienced |
| Kushnir 2006    | Israel                    | Paediatric primary care community centres                                                                                                                                                     | Cross-Sectional     | 126  | Mean: 45.8 (SD 12.47) yrs.                                                                                                                     | 45.8 | 48%    | Paediatrics              | Unclear. But 25 (20.7%) of the participants were clinic directors and of these, 87% were Israeli-board certified paediatricians                                                                                      | Mixture     |
| Kushnir 2014    | Israel                    | Primary care                                                                                                                                                                                  | Cross-Sectional     | 136  | Mean: 52.2 (Range: 33-68; SD 7.02) yrs.                                                                                                        | 52.2 | 32%    | Internal medicine        | Average years of practising medicine was 25.5 years                                                                                                                                                                  | Experienced |
| Kwah 2017       | US                        | 1 Hospital, Mount Sinai Hospital and Elmhurst Hospital Centre                                                                                                                                 | Prospective Cohort  | 54   | n/r                                                                                                                                            | n/r  | n/r    | Internal medicine        | 1st Year residency                                                                                                                                                                                                   | Resident    |
| Lafreniere 2016 | US                        | Resident continuity clinic in a large urban academic medical centre                                                                                                                           | Cross-Sectional     | 44   | Mean: 51 (SD 14) yrs.                                                                                                                          | 51   | 43%    | Internal medicine        | PGY 1-3, Inexperienced                                                                                                                                                                                               | Resident    |
| Lall 2020       | US                        | Hospital                                                                                                                                                                                      | Longitudinal Cohort | 882  | Men: Mean 52.7 (11.9) yrs.; Women: Mean 44.9 (10.4) yrs.                                                                                       | n/r  | 77.40% | Emergency medicine & ICU | Women: 57.1% over 10 years' experience; Men: 77.2% over 10 years' experience.                                                                                                                                        | Experienced |
| Lavanchy 2004   | Canada                    | Family physicians in rural settings; primary/secondary care settings not reported although it seems likely that they are probably primary care based (by virtue of being 'family physicians') | Cross-Sectional     | 131  | n/r                                                                                                                                            | n/r  | n/r    | Physician                | n/r                                                                                                                                                                                                                  | n/r         |
| Lemkau 1994     | US                        | The majority (47 out of 50) were practising as family physicians                                                                                                                              | Cross-Sectional     | 50   | n/r                                                                                                                                            | n/r  | 78%    | Physician                | Practicing family physicians who had previously graduated from a family practice residency.                                                                                                                          | Resident    |
| Leung 2014      | Australia and New Zealand | 80% predominantly worked in public practice, 15% predominantly in private practice and 5% in an equal mix of both. It can be presumed they worked in hospitals due to the nature of the work. | Cross-Sectional     | 220  | Median age was 45.4 yrs.                                                                                                                       | 45.4 | 60%    | Cancer                   | All participants were consultant radiation oncologists (Fellow, Educational Affiliate or Life) members of the Royal Australian and New Zealand College of Radiologists.                                              | Experienced |
| Levin 2017      | US                        | Not explicitly stated but work which is measured refers to inpatients and outpatients so presume it is all hospital work                                                                      | Cross-Sectional     | 938  | Median age was 32 yrs.                                                                                                                         | 32   | 49%    | Neurology                | Participants were all neurology trainees (two thirds of responders were residents and one third were fellows)                                                                                                        | Resident    |

|                        |                                          |                                                                         |                 |      |                                                                                                                                                                                          |       |        |                          |                                                                                                                                                                |             |
|------------------------|------------------------------------------|-------------------------------------------------------------------------|-----------------|------|------------------------------------------------------------------------------------------------------------------------------------------------------------------------------------------|-------|--------|--------------------------|----------------------------------------------------------------------------------------------------------------------------------------------------------------|-------------|
| Li 2018                | China                                    | Hospitals                                                               | Cross-Sectional | 2873 | Mean or median not reported. 25% were under 30 yrs. 48% were aged 30-39 yrs. 19% were 40-49 yrs. 6% were 50-59 yrs. and 1% were 60 yrs. or older.                                        | n/r   | 45%    | Anesthesiology           | 38% were residents, 38% were attendings and 24% were academic professors                                                                                       | Mixture     |
| Linzer 2009            | US                                       | 119 ambulatory clinics in New York, New York, and in the upper Midwest. | Cross-Sectional | 422  | Mean: 42.9 (SD 9.58) yrs.                                                                                                                                                                | 42.9  | 56%    | Physician                | n/r                                                                                                                                                            | n/r         |
| Linzer 2017            | US                                       | 34 practices in three geographic regions of the US.                     | Cross-Sectional | 146  | No overall mean or median age provided for the sample. However, the mean age of physicians classed as 'satisfied' with work was 47 yrs. and those classed as 'not satisfied' was 49 yrs. | n/r   | 48%    | Physician                | Mean years in practice was 13 yrs.                                                                                                                             | Experienced |
| Loerbroks 2017         | Germany                                  | Hospitals                                                               | Cross-Sectional | 416  | Mean: 40.1 (SD 2.9) yrs.                                                                                                                                                                 | 40.1  | 49%    | Mixed                    | Experienced: 10 years after being junior doctors in 2004                                                                                                       | Experienced |
| Lu 2015                | US                                       | Emergency department                                                    | Cross-Sectional | 77   | n/r                                                                                                                                                                                      | n/r   | 62%    | Emergency medicine & ICU | Mostly experienced attendings (60%)                                                                                                                            | Experienced |
| Makara-Studzinska 2020 | Poland                                   | Hospital                                                                | Cross-Sectional | 318  | Mean: 47 (SD 11.21) yrs.                                                                                                                                                                 | 47    | 34%    | Mixed                    | Varied from 1-56 years (Mean: 20.18 (SD 11.5) yrs.)                                                                                                            | Experienced |
| Marchalik 2019         | US, Italy, Portugal, France, and Belgium | Urology trainees                                                        | Cross-Sectional | 211  | n/r                                                                                                                                                                                      | n/r   | 63%    | Urology                  | All participants were urology trainees                                                                                                                         | Resident    |
| McAbee 2015            | US                                       | All surgeons                                                            | Cross-Sectional | 750  | No mean or median age reported. 12% were 40 yrs. or under; 19% were 41-45 yrs.; 18% were 46-50 yrs.; 19% were 51-55 yrs.; 16% were 56-60 yrs.; 10% were 61-65 yrs.; 6% were over 65 yrs. | n/r   | 87%    | Neurosurgery             | All experienced neurosurgeons. 10% had less than 5 years practising; 16% 5-10 years; 20% 11-15 years; 16% 16-20 years; 17% 20-25 years; 22% more than 25 years | Experienced |
| McNearney 2008         | US                                       | Presume hospitals as all participants were rheumatologists              | Cross-Sectional | 285  | Mean: 51.3 (Range 33-89) yrs.                                                                                                                                                            | 51.3  | 76%    | Rheumatology             | Experienced. 60% were more than 10 years past their fellowship training                                                                                        | Experienced |
| Mehta 2019             | US                                       | Presume hospitals as all participants were cardiologists                | Cross-Sectional | 2313 | n/r                                                                                                                                                                                      | n/r   | 58%    | Cardiology               | Included fellows in training and more experienced cardiologists                                                                                                | Mixture     |
| Messerotti 2020        | Italy                                    | Hospital                                                                | Cross-Sectional | 226  | n/r, only reports yrs. from graduation                                                                                                                                                   | n/r   | 44.00% | Mixed                    | Mixture of experience from graduation ranging from <3 to >16 yrs.                                                                                              | Mixture     |
| Mohammed 2018          | Iraq                                     | Three hospitals based on the Medical City University Campus             | Cross-Sectional | 310  | Mean: 34.75 (SD 7.5) yrs.                                                                                                                                                                | 34.75 | 50%    | Mixed                    | Various: 9% had been practicing for less than 5 years; 77% for 5-14 years; 14% for over 15 years                                                               | Experienced |

|                     |         |                                                                                                                  |                    |     |                                                                                                                                         |      |        |                          |                                                                                                                                                                          |             |
|---------------------|---------|------------------------------------------------------------------------------------------------------------------|--------------------|-----|-----------------------------------------------------------------------------------------------------------------------------------------|------|--------|--------------------------|--------------------------------------------------------------------------------------------------------------------------------------------------------------------------|-------------|
|                     |         | Employed by non-academic hospital or medical centre 55 (28.2%)                                                   |                    |     |                                                                                                                                         |      |        |                          | 1–10 years post-training 164 (77.4%)                                                                                                                                     |             |
|                     |         | Private practice 28 (14.4%)                                                                                      |                    |     |                                                                                                                                         |      |        |                          | 11–20 years post-training 19 (9.0%)                                                                                                                                      |             |
|                     |         | Veterans Affairs Medical Centres 2 (1.0%)                                                                        |                    |     |                                                                                                                                         |      |        |                          | >20 years post-training 6 (2.8%)                                                                                                                                         |             |
|                     |         | Other 13 (6.7%)                                                                                                  |                    |     |                                                                                                                                         |      |        |                          |                                                                                                                                                                          |             |
| Moreno-Jimenez 2012 | Spain   | Random stratified sample of the primary care centres and hospitals of the community of Madrid                    | Cross-Sectional    | 485 | Mean: 44.3 yrs.                                                                                                                         | 44.3 | 53.80% | Physician                | 18.3 average years of experience (SD 8.5), and 12.2 average years of seniority (SD 8.1), 54.8% of the physicians had a master's degree, and 36.3% had a doctorate degree | Experienced |
| Nguyen 2021         | US      | Hospital                                                                                                         | Cross-Sectional    | 166 | 22 (13.3%) were 32-40 yrs.; 55 (33.1%) were 41-50 yrs.; 42 (25.3%) were 51-60 yrs.; 37 (22.3%) were 61-70 yrs.; 10 (6%) were 71-75 yrs. | n/r  | 73%    | Emergency medicine & ICU | Mixed (from less than 5 years to over 20 years of experience)                                                                                                            | Mixture     |
| Nwosu 2020          | Nigeria | Hospital                                                                                                         | Cross-Sectional    | 535 | n/r                                                                                                                                     | n/r  | 73.80% | Mixed                    | Mixed                                                                                                                                                                    | Mixture     |
| Ochoa 2018          | Ecuador | 67.6% were in surgical medical departments, 28.1% in critical care departments, and 4.4% in administrative units | Cross-Sectional    | 435 | 24 to 34 years (32.3%), 35 to 45 years (37.7%), 45 to 56 years (21.8%), 57 years and above (8.2%)                                       | n/r  | 58%    | n/r                      | n/r                                                                                                                                                                      | n/r         |
| O'Connor 2017       | Ireland | Hospital based                                                                                                   | Prospective Cohort | 172 | 81% were up to 30 years and 19% over 30 years                                                                                           | n/r  | 44%    | Surgery                  | Inexperienced                                                                                                                                                            | Resident    |
| O'Connor 2019       | US      | Internal medicine residency programs                                                                             | Cross-Sectional    | 245 | <45 yrs. - 73 (30%);                                                                                                                    | n/r  | 59%    | Internal medicine        | Tenure                                                                                                                                                                   | Resident    |
|                     |         |                                                                                                                  |                    |     | 45-54 yrs. - 84 (34%);                                                                                                                  |      |        |                          | ≤2 yrs. - 89 (36%)                                                                                                                                                       |             |
|                     |         |                                                                                                                  |                    |     | 55+ yrs. - 81 (33%)                                                                                                                     |      |        |                          | 3-6 yrs. - 74 (30%)                                                                                                                                                      |             |
|                     |         |                                                                                                                  |                    |     | n/r - 7 (3%)                                                                                                                            |      |        |                          | ≥7 yrs. - 82 (33%)                                                                                                                                                       |             |
| Opoku 2014          | Ghana   | Mainly urban government practices                                                                                | Cross-Sectional    | 200 | 18–29 years, 99 (49.5%);                                                                                                                | n/r  | 66.50% | Mixed                    | <2 years, 47 (23.5%)                                                                                                                                                     | Resident    |
|                     |         |                                                                                                                  |                    |     | 30–39 years, 82 (41.0%);                                                                                                                |      |        |                          | 2–5 years, 103 (51.5%)                                                                                                                                                   |             |
|                     |         |                                                                                                                  |                    |     | 40–49 years, 10 (5.0%);                                                                                                                 |      |        |                          | 6–10 years, 30 (15.0%)                                                                                                                                                   |             |
|                     |         |                                                                                                                  |                    |     | 50–59 years, 8 (4.0%);                                                                                                                  |      |        |                          | 11–15 years, 9 (4.5%)                                                                                                                                                    |             |
|                     |         |                                                                                                                  |                    |     | 60 years and above, 1 (0.5%)                                                                                                            |      |        |                          | 16–20 years, 5 (2.5%)                                                                                                                                                    |             |
|                     |         |                                                                                                                  |                    |     |                                                                                                                                         |      |        |                          | >20 years 6, (3.0%)                                                                                                                                                      |             |
| Ozvacic Adzic 2012  | Croatia | Family Practices                                                                                                 | Cross-Sectional    | 125 | Mean: 46 (SD 7) yrs.                                                                                                                    | 46   | 18%    | Physician                | 13.3 years at current position                                                                                                                                           | Experienced |
| Ozyurt 2006         | Turkey  | Four public                                                                                                      | Cross-Sectional    | 598 | <29 yrs., 84 (14.2%);                                                                                                                   | n/r  | 64%    | Mixed                    | Years in profession:                                                                                                                                                     | Experienced |

|                   |             |                                                                                                                                                                       |                                  |      |                                                                                                                                                        |       |        |                   |                                                                                                                                   |             |
|-------------------|-------------|-----------------------------------------------------------------------------------------------------------------------------------------------------------------------|----------------------------------|------|--------------------------------------------------------------------------------------------------------------------------------------------------------|-------|--------|-------------------|-----------------------------------------------------------------------------------------------------------------------------------|-------------|
|                   |             | hospitals, four private hospitals, one university hospital and ten public health centres were included                                                                |                                  |      | 30–39 yrs., 189, (31.9%);                                                                                                                              |       |        |                   | 0–9 yrs. - 160 (27.2%)                                                                                                            |             |
|                   |             |                                                                                                                                                                       |                                  |      | 40–49 yrs., 243 (41.0%);                                                                                                                               |       |        |                   | 10–19 yrs. - 231 (39.3%)                                                                                                          |             |
|                   |             |                                                                                                                                                                       |                                  |      | >50 yrs., 77 (13.0%)                                                                                                                                   |       |        |                   | 20–29 yrs. - 160 (27.2%)                                                                                                          |             |
|                   |             |                                                                                                                                                                       |                                  |      |                                                                                                                                                        |       |        |                   | >30 yrs. - 37 (6.3%)                                                                                                              |             |
| Pantenburg 2016   | Germany     | 83% in inpatient setting (of these 85% were based in a hospital with more than 100 beds). 27% in outpatient setting (50% of those worked as primary care physicians). | Cross-Sectional                  | 2357 | Mean: 32.9 yrs.                                                                                                                                        | 32.9  | 34%    | Mixed             | Length of work experience (years) [mean (SD; range)] 5.6 (3.8; 0 - 17)                                                            | Mixture     |
| Park 2016         | Korea       | 4 university hospitals in 4 different cities                                                                                                                          | Cross-Sectional                  | 317  | Mean: 30.4 (SD 2.9) yrs.                                                                                                                               | 30.4  | 68%    | Mixed             | PGY: 1-4, Inexperienced                                                                                                           | Resident    |
| Passalacqua 2012  | US          | Residents in internal medicine rotating between 3 hospitals                                                                                                           | Cross-Sectional                  | 93   | Mean: 29.6 (SD 3.19) yrs.                                                                                                                              | 29.6  | 70%    | Internal medicine | Mostly inexperienced residents                                                                                                    | Resident    |
| Pedersen 2016     | Denmark     | Primary care                                                                                                                                                          | Cross-Sectional                  | 129  | Mean: 48.9 (SD 17.1) yrs., Range: 20-103                                                                                                               | 48.9  | 100%   | GPs               | Experienced                                                                                                                       | Experienced |
| Pei 2020          | China       | Medium and large sized hospitals from across China                                                                                                                    | Cross-Sectional                  | 1376 | Most were aged: 25-44 yrs. (70.8%)                                                                                                                     | n/r   | 53.10% | Internal medicine | 55% had worked for more than 10 years, and more than 70% had junior or middle professional titles                                 | Experienced |
| Pit 2014, 2016    | Australia   | GP's                                                                                                                                                                  | Cross-Sectional                  | 92   | Mean: 51 (SD 10.7) yrs.                                                                                                                                | 51    | 60%    | GPs               | Years in general practice 20 (SD 12.4) yrs.                                                                                       | Experienced |
| Prins 2009        | Netherlands | Residents training for a referral specialty                                                                                                                           | Cross-Sectional                  | 2115 | Mean: 31.5 (SD 3.5)                                                                                                                                    | 31.5  | 39%    | Interns/Residents | Mostly inexperienced residents                                                                                                    | Resident    |
| Prudenzi 2021     | UK          | n/r - but recruited through primary care managers                                                                                                                     | Cross-Sectional                  | 98   | Mean: 42.97 (SD 10.18) yrs.                                                                                                                            | 42.97 | 9.20%  | n/r               | n/r                                                                                                                               | n/r         |
| Pu 2017           | China       | Hospitals                                                                                                                                                             | Cross-Sectional                  | 5558 | Age, Women N (%), Men N (%):<br>20–35 yrs., 1247 (41.8%), 833 (32.8%);<br>35–50 yrs., 1514 (50.7%), 1380 (54.4%);<br>>50 yrs., 224 (7.5%), 324 (12.8%) | n/r   | 46%    | Neurology         | n/r                                                                                                                               | n/r         |
| Qureshi 2015      | US          | Plastic surgeons' members of the American Society of Plastic Surgeons                                                                                                 | Cross-Sectional                  | 1691 | Mean: 50.8, (Range 33-74) yrs.                                                                                                                         | 50.8  | 75%    | Surgery           | Mean: 11.5 yrs.                                                                                                                   | Experienced |
| Rabatin 2016      | US          | Primary care                                                                                                                                                          | Cross-Sectional and Longitudinal | 422  | n/r                                                                                                                                                    | n/r   | 56%    | GPs               | n/r                                                                                                                               | n/r         |
| Rafferty 1986     | US          | Primary care                                                                                                                                                          | Cross-Sectional                  | 67   | Mean: 29.09 (SD 3.78) yrs.                                                                                                                             | 29.09 | 79%    | Physician         | 31.3% were in their first year of residency training; 34.3% were in their second year; 34.3% were in their third year of training | Resident    |
| Rao 2020          | US          | Hospital doctors                                                                                                                                                      | Cross-Sectional                  | 1882 | n/r                                                                                                                                                    | n/r   | 51.10% | Mixed             | Mixture of early to late career doctors                                                                                           | Mixture     |
| Ratanawongsa 2008 | US          | Primary care                                                                                                                                                          | Prospective Cohort               | 40   | Mean: 41.9 (SD 8.7)                                                                                                                                    | 41.9  | 34%    | Physician         | Mean: 11.2 yrs.                                                                                                                   | Experienced |

|                |                            |                                                                                   |                    |      |                                                                         |      |        |                          |                                                            |             |
|----------------|----------------------------|-----------------------------------------------------------------------------------|--------------------|------|-------------------------------------------------------------------------|------|--------|--------------------------|------------------------------------------------------------|-------------|
| Rath 2015      | Canada                     | Hospital                                                                          | Cross-Sectional    | 369  | Mean: 48 yrs.                                                           | 48   | 62.40% | Cancer                   | Senior doctors                                             | Experienced |
| Ripp 2010a     | US                         | 1 Hospital, Mount Sinai Hospital and Elmhurst Hospital Centre                     | Cross-Sectional    | 145  | n/r                                                                     | n/r  | 50%    | Interns/Residents        | 1st Year residency                                         | Resident    |
| Ripp 2010b     | US                         | 5 Hospital institutions                                                           | Prospective Cohort | 253  | Mean: 28 yrs.                                                           | 28   | 54%    | Interns/Residents        | 1st Year residency                                         | Resident    |
| Roy 2017       | Bangladesh                 | District areas mixed setting                                                      | Cross-Sectional    | 354  | Mean: 39.2 yrs.                                                         | 39.2 | 70%    | Mixed                    | Mixed                                                      | Mixture     |
| Ruggieri 2014  | Italy                      | Hospital                                                                          | Cross-Sectional    | 167  | Mean: 42 yrs.                                                           | 42   | 51.50% | Cancer                   | Mixed                                                      | Mixture     |
| Sahin 2019     | Turkey                     | Hospital                                                                          | Cross-Sectional    | 158  | n/r                                                                     | n/r  | 60.70% | Mixed                    | Mixed                                                      | Mixture     |
| Salles 2019    | US                         | Hospital                                                                          | Cross-Sectional    | 146  | Mean: 30.4 yrs.                                                         | 30.4 | 58%    | Surgery                  | Residents, 1-5 years postgrad                              | Resident    |
| Schaufeli 2009 | Netherlands                | Mixed                                                                             | Cross-Sectional    | 2115 | Mean: 31.5 yrs.                                                         | 31.5 | 39.30% | Interns/Residents        | Up to 6 years post med school experience                   | Experienced |
| Shanafelt 2002 | US                         | University of Washington Affiliated Hospitals Internal Medicine Residency program | Cross-Sectional    | 115  | n/r                                                                     | n/r  | 47%    | Interns/Residents        | 1-3 years                                                  | Resident    |
| Shanafelt 2009 | US                         | University/Academic-Clinical staff                                                | Cross-Sectional    | 465  | 38.5% were 45-54 years, 34.1% were 35-44 years of age. No mean reported | n/r  | 77%    | Mixed                    | Mixed                                                      | Mixture     |
| Shanafelt 2010 | US                         | Members of the American College of Surgeons                                       | Cross-Sectional    | 7905 | Mean: 51 (Range 43-59) yrs.                                             | 51   | 87%    | Internal medicine        | 1-3 years                                                  | Resident    |
| Shanafelt 2014 | US                         | Hospital                                                                          | Cross-Sectional    | 1117 | Mean: 52 yrs.                                                           | 52   | 50%    | Cancer                   | Mixed                                                      | Mixture     |
| Sinsky 2017    | US                         | Multiple settings                                                                 | Cross-Sectional    | 6880 | Median: 56 yrs.                                                         | 56   | 67%    | Mixed                    | n/r                                                        | n/r         |
| Siu 2012       | Hong Kong                  | Hospital                                                                          | Cross-Sectional    | 226  | Mean: 37 (Range 30.5-44.0) yrs.                                         | 37   | 67%    | Mixed                    | Experienced: 12.0 yrs. (6.0-20.0)                          | Experienced |
| Sliwa 2019     | US                         | Mixed                                                                             | Cross-Sectional    | 1536 | n/r                                                                     | n/r  | 58%    | Physician                | n/r                                                        | n/r         |
| Soler 2008     | Europe - various countries | Family physicians                                                                 | Cross-Sectional    | 1393 | Mean: 45.4 (SD 8.5) yrs.                                                | 45.4 | 55%    | Physician                | Experienced – Mean: 19 (SD 8.5) yrs.                       | Experienced |
| Sonmez 2021    | Turkey                     | Hospital                                                                          | Cross-Sectional    | 141  | Mean: 33.3 (SD 7.3) yrs.                                                | 33.3 | 58.20% | Emergency medicine & ICU | Mixed - residents, specialists and GPs and faculty members | Mixture     |
| Stafford 2010  | Australia                  | Hospital                                                                          | Cross-Sectional    | 29   | n/r                                                                     | n/r  | 82.80% | Cancer                   | n/r                                                        | n/r         |
| Sulaiman 2017  | Ireland                    | Teaching hospitals                                                                | Cross-Sectional    | 265  | Mean: 28.5 (SD 0.26) yrs.                                               | 28.5 | 53%    | Mixed                    | 96% had less than 10 years' experience                     | Resident    |
| Sun 2017       | US                         | 36 Primary care practices                                                         | Cross-Sectional    | 102  | n/r                                                                     | n/r  | 49%    | Internal medicine        | Mostly experienced, median: 15 yrs.                        | Experienced |
| Sun 2021       | China                      | Hospital                                                                          | Cross-Sectional    | 842  | ≤ 30 yrs.: 23.3%; 31–40 yrs.: 29%; 41–50 yrs.: 26.1%; ≥ 51 yrs.: 11.6%  | n/r  | 46.40% | Mixed                    | Mixture                                                    | Mixture     |
| Surgenor 2009  | New Zealand                | Hospital                                                                          | Cross-Sectional    | 267  | Mean: 48 (SD 7.7) yrs.                                                  | 48   | 73%    | Mixed                    | Experienced – Mean 17.0 (SD 8.6) years as consultant       | Experienced |
| Tak 2017       | US                         | Mixed                                                                             | Cross-Sectional    | 1289 | n/r                                                                     | n/r  | 63.20% | Mixed                    | n/r                                                        | n/r         |
| Tawfik 2018    | US                         | All healthcare settings                                                           | Cross-Sectional    | 6695 | Median: 56 yrs.                                                         | 56   | 67%    | Mixed                    | Mixed                                                      | Mixture     |

|                        |                 |                                                                                                                                    |                      |       |                                                                                              |       |                          |                          |                                    |             |
|------------------------|-----------------|------------------------------------------------------------------------------------------------------------------------------------|----------------------|-------|----------------------------------------------------------------------------------------------|-------|--------------------------|--------------------------|------------------------------------|-------------|
| Taycan 2012            | Turkey          | Mixed                                                                                                                              | Cross-Sectional      | 139   | CHS – Mean: 29.6 (SD 4.0) yrs.; non CHS – Mean: 34.8 (SD 4.8) yrs.                           | n/r   | CHS (65%); non CHS (72%) | n/r                      | Mixed                              | Mixture     |
| Tian 2019              | China           | Hospital                                                                                                                           | Cross-Sectional      | 2008  | n/r                                                                                          | n/r   | 32.70%                   | Neurology                | Mixed                              | Mixture     |
| Tokuda 2009            | Japan           | Hospital                                                                                                                           | Cross-Sectional      | 236   | Mean: 40.9 (SD 7.8) yrs. (Range 26 to 67 yrs.)                                               | 40.9  | 75%                      | Physician                | 3 to 42 years (mean 15.8, SD 7.4)  | Mixture     |
| Toral-Villanueva 2009  | Mexico          | Three hospitals: a specialty hospital (tertiary level), a general zone hospital (secondary level) and a national health institute. | Cross-Sectional      | 312   | Mean 28 (SD 2)                                                                               | 28    | 57%                      | Interns/Residents        | Inexperienced                      | Resident    |
| Torppa 2015            | Finland         | Primary care                                                                                                                       | Cross-Sectional      | 165   | n/r (age of emotionally/not emotionally exhausted GPs reported but not av. age of sample)    | n/r   | 25%                      | GPs                      | Mixed                              | Mixture     |
| Torres 2015            | Spain           | 22 primary care centres                                                                                                            | Cross-Sectional      | 108   | Mean: 49.1 (SD 8.07) yrs.                                                                    | 49.1  | 46%                      | GPs                      | n/r                                | n/r         |
| Trockel 2018           | US              | Academic medical centre                                                                                                            | Prospective Cohort   | 250   | 51.2% were 30 to 39 yrs., 33.2% were < 30 yrs., 8.8% were 40 to 49 yrs., 6.0% were ≥ 50 yrs. | n/r   | 50%                      | Mixed                    | Mixed                              | Mixture     |
| Umene-Nakano 2013      | Japan           | Medical schools                                                                                                                    | Cross-Sectional      | 704   | Mean: 37.2 (SD 7.5) yrs.                                                                     | 37.2  | 77%                      | Psychiatry               | Mean 9.6 (SD 8.2) yrs.             | Mixture     |
| Vanhaecht 2019         | Netherlands     | 32 Dutch hospitals that participate in the 'Peer Support Collaborative'                                                            | Cross-Sectional      | 1619  | n/r                                                                                          | n/r   | 44%                      | Mixed                    | Mostly experienced, mean: 11 years | Experienced |
| vanWulfftenPalthe 2016 | International   | Academic medicine                                                                                                                  | Cross-Sectional      | 210   | n/r                                                                                          | n/r   | 90%                      | Surgery                  | Mixed                              | Mixture     |
| Visser 2003            | Netherlands     | Mixed                                                                                                                              | Cross-Sectional      | 1573  | Mean: 46.9 (SD 7.8) yrs.                                                                     | 46.9  | 82%                      | Mixed                    | n/r                                | n/r         |
| Voultzos 2020          | Greece & Cyprus | Hospital                                                                                                                           | Cross-Sectional      | 80    | Range: 32-65 yrs.                                                                            | 43    | 40.20%                   | Emergency medicine & ICU | n/r                                | n/r         |
| Walocha 2013           | Poland          | Surgical, non-surgical and primary care                                                                                            | Cross-Sectional      | 71    | Range: 25-68 yrs.                                                                            | n/r   | 64%                      | Physician                | Not specified but presume mixture  | Mixture     |
| Ward 2020              | US              | Primary care                                                                                                                       | Cross-Sectional      | 2,740 | n/r                                                                                          | n/r   | 55%                      | Physician                | n/r                                | n/r         |
| Watson 2018            | US              | Emergency department                                                                                                               | Cross-Sectional      | 84    | n/r                                                                                          | n/r   | n/r                      | Emergency medicine & ICU | Experienced                        | Experienced |
| Weigl 2015             | Germany         | Paediatric hospital                                                                                                                | Cross-Sectional      | 96    | Mean: 37.46 (SD 8.55) yrs.                                                                   | 37.46 | 47%                      | Paediatrics              | Mixed: 44.3% Junior physicians     | Mixture     |
| Weigl & Schneider 2017 | Germany         | Emergency Department                                                                                                               | Cross-Sectional      | 29    | n/r                                                                                          | n/r   | n/r                      | Emergency medicine & ICU | Mixture                            | Mixture     |
| Welle 2020             | US              | Mixed                                                                                                                              | Retrospective Cohort | 429   | n/r                                                                                          | n/r   | n/r                      | Physician                | n/r                                | n/r         |
| Welp 2014              | Switzerland     | Intensive Care Units                                                                                                               | Cross-Sectional      | 243   | Mean: 39.13 (SD 10.14)                                                                       | 39.13 | 50%                      | Emergency medicine & ICU | Mixed                              | Mixture     |
| Wen 2016               | China           | 12 tertiary, 9 secondary, and 25 primary hospitals were included                                                                   | Cross-Sectional      | 1537  | Mean: 38 (SD 9) yrs.; Range 30-50 yrs.                                                       | 38    | 56%                      | Mixed                    | Mixture                            | Mixture     |
| Weng 2011              | Taiwan          | Hospital                                                                                                                           | Prospective Cohort   | 110   | Mean: 40.78 (SD 6.91) yrs.                                                                   | 40.78 | 86%                      | Internal medicine        | Mixture                            | Mixture     |
| West 2006              | US              | Internal Medicine Residency program in Mayo Clinic                                                                                 | Prospective Cohort   | 184   | 70% were up to 30 years and 16% over 30 years                                                | n/r   | 51%                      | Interns/Residents        | Inexperienced                      | Resident    |

|                    |        |                                                                                                                                                                                                         |                     |      |                                               |      |     |                          |                                                      |             |
|--------------------|--------|---------------------------------------------------------------------------------------------------------------------------------------------------------------------------------------------------------|---------------------|------|-----------------------------------------------|------|-----|--------------------------|------------------------------------------------------|-------------|
| West 2009          | US     | Internal Medicine Residency program in Mayo Clinic                                                                                                                                                      | Prospective Cohort  | 380  | 72% were up to 30 years and 28% over 30 years | n/r  | 62% | Interns/Residents        | Inexperienced                                        | Resident    |
| Whitebird 2017     | US     | 172 primary care clinics in 18 health care systems across 8 states prior to the implementation of a collaborative model of care for patients with depression and diabetes and/or cardiovascular disease | Cross-Sectional     | 709  | n/r                                           | n/r  | 51% | Physician                | Mostly experienced (75% over 10 years of experience) | Experienced |
| Willard-Grace 2019 | US     | Primary care                                                                                                                                                                                            | Longitudinal Cohort | 252  | n/r                                           | n/r  | n/r | Physician                | n/r                                                  | n/r         |
| Williams 2007      | US     | Ambulatory clinics                                                                                                                                                                                      | Cross-Sectional     | 426  | Mean: 43 (Range 29 to 89) yrs.                | 43   | 55% | Physician                | n/r                                                  | n/r         |
| Williamson 2018    | US     | Hospital                                                                                                                                                                                                | Cross-Sectional     | 261  | Mean: 29 yrs.                                 | 29   | 71% | Emergency medicine & ICU | Mixed                                                | Mixture     |
| Wright 2011        | Canada | Hospital                                                                                                                                                                                                | Cross-Sectional     | 212  | nr                                            | n/r  | 59% | Paediatrics              | n/r                                                  | n/r         |
| Xiao 2014          | China  | Hospital                                                                                                                                                                                                | Cross-Sectional     | 205  | n/r                                           | n/r  | 61% | Emergency medicine & ICU | Male: Mean 9.3 (SD 4.1); Female: 8.7 (SD 3.9)        | Mixture     |
| Yost 2014          | US     | Hospital                                                                                                                                                                                                | Cross-Sectional     | 48   | Mean: 30.9 yrs.                               | 30.9 | 67% | Surgery                  | Mixed                                                | Mixture     |
| Zhang 2011         | China  | Hospital                                                                                                                                                                                                | Cross-Sectional     | 1451 | n/r                                           | n/r  | 66% | Mixed                    | Mixed                                                | Mixture     |
| Zhou 2017          | China  | Hospital                                                                                                                                                                                                | Cross-Sectional     | 6111 | n/r                                           | n/r  | 46% | Neurology                | Mixed                                                | Mixture     |

\*Data for these variables were coded by the core research team into suitable groups. For age we used mean which was most commonly reported, otherwise median when reported. The overall median for age across studies was calculated combining both the mean and median (where mean was not available) values of the studies. The meta-regression and subgroup analysis for age thus also involved some median values rather than means. SD: standard deviation; yrs.: years; n/r: not reported.



## Appendix 7: Citations for included studies

1. Adarkwah CC, Schwaffertz A, Labenz J, Becker A, Hirsch O. Burnout and work satisfaction in general practitioners practicing in rural areas: results from the HaMEdSi study. *Psychol Res Behav Manag* 2018; **11**: 483-94.
2. Al-Dubai SA, Ganasegeran K, Perianayagam W, Rampal KG. Emotional burnout, perceived sources of job stress, professional fulfillment, and engagement among medical residents in Malaysia. *ScientificWorldJournal* 2013; **2013**: 137620.
3. Alrawashdeh HM, Al-Tammemi AaB, Alzawahreh MK, et al. Occupational burnout and job satisfaction among physicians in times of COVID-19 crisis: a convergent parallel mixed-method study. *BMC Public Health* 2021; **21**(1): 811.
4. Anagnostopoulos F, Liolios E, Persefonis G, Slater J, Kafetsios K, Niakas D. Physician burnout and patient satisfaction with consultation in primary health care settings: evidence of relationships from a one-with-many design. *J Clin Psychol Med Settings* 2012; **19**(4): 401-10.
5. Appelbaum NP, Lee N, Amendola M, Dodson K, Kaplan B. Surgical Resident Burnout and Job Satisfaction: The Role of Workplace Climate and Perceived Support. *J Surg Res* 2019; **234**: 20-5.
6. Arora M, Diwan AD, Harris IA. Prevalence and factors of burnout among Australian orthopaedic trainees: a cross-sectional study. *J Orthop Surg (Hong Kong)* 2014; **22**(3): 374-7.
7. Asai M, Akizuki N, Fujimori M, et al. Impaired mental health among the bereaved spouses of cancer patients. *Psycho-Oncology* 2013; **22**(5): 995-1001.
8. Attenello FJ, Buchanan IA, Wen T, et al. Factors associated with burnout among US neurosurgery residents: a nationwide survey. *J Neurosurg* 2018; **129**(5): 1349-63.
9. Baer TE, Feraco AM, Tuysuzoglu Sagalowsky S, Williams D, Litman HJ, Vinci RJ. Pediatric Resident Burnout and Attitudes Toward Patients. *Pediatrics* 2017; **139**(3).
10. Baghdadi LR, Baghdadi RR, Kamal RS, et al. Physicians' job satisfaction, ethics and burnout in Makkah, Saudi Arabia. *J Pak Med Assoc* 2020; **70**(12(b)): 2383-9.
11. Bahadırılı S, Sagaltici E. Burnout, Job Satisfaction, and Psychological Symptoms Among Emergency Physicians During COVID-19 Outbreak: A Cross-Sectional Study. *Psychiatry and Clinical Psychopharmacology* 2021; **31**.
12. Balch CM, Shanafelt T. Combating stress and burnout in surgical practice: a review. *Thorac Surg Clin* 2011; **21**(3): 417-30.
13. Blanchard P, Truchot D, Albiges-Sauvin L, et al. Prevalence and causes of burnout amongst oncology residents: a comprehensive nationwide cross-sectional study. *Eur J Cancer* 2010; **46**(15): 2708-15.
14. Bourne T, Shah H, Falconieri N, et al. Burnout, well-being and defensive medical practice among obstetricians and gynaecologists in the UK: cross-sectional survey study. *BMJ Open* 2019; **9**(11): e030968.
15. Bressi C, Porcellana M, Gambini O, et al. Burnout among psychiatrists in Milan: a multicenter survey. *Psychiatr Serv* 2009; **60**(7): 985-8.
16. Brown SD, Goske MJ, Johnson CM. Beyond substance abuse: stress, burnout, and depression as causes of physician impairment and disruptive behavior. *J Am Coll Radiol* 2009; **6**(7): 479-85.

17. Brunsberg KA, Landrigan CP, Garcia BM, et al. Association of Pediatric Resident Physician Depression and Burnout With Harmful Medical Errors on Inpatient Services. *Acad Med* 2019; **94**(8): 1150-6.
18. Busis NA, Shanafelt TD, Keran CM, et al. Burnout, career satisfaction, and well-being among US neurologists in 2016. *Neurology* 2017; **88**(8): 797-808.
19. Campbell DA, Jr., Sonnad SS, Eckhauser FE, Campbell KK, Greenfield LJ. Burnout among American surgeons. *Surgery* 2001; **130**(4): 696-702; discussion -5.
20. Chen KY, Yang CM, Lien CH, et al. Burnout, job satisfaction, and medical malpractice among physicians. *Int J Med Sci* 2013; **10**(11): 1471-8.
21. Cooke GP, Doust JA, Steele MC. A survey of resilience, burnout, and tolerance of uncertainty in Australian general practice registrars. *BMC Med Educ* 2013; **13**: 2.
22. Coombs DM, Lanni M, Fosnot J, et al. Professional Burnout in US Plastic Surgery Residents: Is It a Legitimate Concern? *Plast Reconstr Surg Glob Open* 2019; **7**(8 Suppl): 129-30.
23. Coombs DM, Lanni MA, Fosnot J, et al. Professional Burnout in United States Plastic Surgery Residents: Is It a Legitimate Concern? *Aesthetic Surgery Journal* 2020; **40**(7): 802-10.
24. Cydulka RK, Korte R. Career satisfaction in emergency medicine: the ABEM Longitudinal Study of Emergency Physicians. *Ann Emerg Med* 2008; **51**(6): 714-22.e1.
25. de Oliveira GS, Jr., Chang R, Fitzgerald PC, et al. The prevalence of burnout and depression and their association with adherence to safety and practice standards: a survey of United States anesthesiology trainees. *Anesth Analg* 2013; **117**(1): 182-93.
26. Dewa CS, Jacobs P, Thanh NX, Loong D. An estimate of the cost of burnout on early retirement and reduction in clinical hours of practicing physicians in Canada. *BMC Health Services Research* 2014; **14**(1): 254.
27. Ding M, Babenko O, Koppula S, Oswald A, White J. Physicians as Teachers and Lifelong Learners. *J Contin Educ Health Prof* 2019; **39**(1): 2-6.
28. Dirvar F, Dirvar SU, Kaygusuz MA, Evren B, Öztürk İ. Effect of malpractice claims on orthopedic and traumatology physicians in Turkey: A survey study. *Acta Orthop Traumatol Turc* 2021; **55**(2): 171-6.
29. Djulbegovic M, Beckstead JW, Fraenkel L. The Patient Care Ownership Scale: Development of an Instrument to Measure Patient Care Ownership Among Internal Medicine Trainees. *J Gen Intern Med* 2019; **34**(8): 1530-7.
30. Doan-Wiggins L, Zun L, Cooper MA, Meyers DL, Chen EH. Practice satisfaction, occupational stress, and attrition of emergency physicians. Wellness Task Force, Illinois College of Emergency Physicians. *Acad Emerg Med* 1995; **2**(6): 556-63.
31. Dominguez LC, Stassen L, de Grave W, Sanabria A, Alfonso E, Dolmans D. Taking control: Is job crafting related to the intention to leave surgical training? *PLoS One* 2018; **13**(6): e0197276.
32. Duan X, Ni X, Shi L, et al. The impact of workplace violence on job satisfaction, job burnout, and turnover intention: the mediating role of social support. *Health Qual Life Outcomes* 2019; **17**(1): 93.
33. El Kettani A, Serhier Z, Othmani MB, Agoub M, Battas O. [Evaluation of burnout syndrome among doctors in training at the Ibn Rochd University Hospital, Casablanca]. *Pan Afr Med J* 2017; **27**: 243.

34. Estryng-Behar M, Doppia MA, Guetarni K, et al. Emergency physicians accumulate more stress factors than other physicians—results from the French SESMAT study. *Emerg Med J* 2011; **28**(5): 397-410.
35. Fahrenkopf AM, Sectish TC, Barger LK, et al. Rates of medication errors among depressed and burnt out residents: prospective cohort study. *BMJ* 2008; **336**(7642): 488-91.
36. Faivre G, Kielwasser H, Bourgeois M, Panouilleres M, Loisel F, Obert L. Burnout syndrome in orthopaedic and trauma surgery residents in France: A nationwide survey. *Orthop Traumatol Surg Res* 2018; **104**(8): 1291-5.
37. Freeborn DK. Satisfaction, commitment, and psychological well-being among HMO physicians. *West J Med* 2001; **174**(1): 13-8.
38. Garrouste-Orgeas M, Perrin M, Soufir L, et al. The Iatref study: medical errors are associated with symptoms of depression in ICU staff but not burnout or safety culture. *Intensive Care Med* 2015; **41**(2): 273-84.
39. Gilles I, Burnand B, Peytremann-Bridevaux I. Factors associated with healthcare professionals' intent to stay in hospital: a comparison across five occupational categories. *Int J Qual Health Care* 2014; **26**(2): 158-66.
40. Glasheen JJ, Misky GJ, Reid MB, Harrison RA, Sharpe B, Auerbach A. Career Satisfaction and Burnout in Academic Hospital Medicine. *Archives of Internal Medicine* 2011; **171**(8): 782-90.
41. Goldberg R, Boss RW, Chan L, et al. Burnout and its correlates in emergency physicians: four years' experience with a wellness booth. *Acad Emerg Med* 1996; **3**(12): 1156-64.
42. Golub JS, Johns MM, 3rd, Weiss PS, Ramesh AK, Ossoff RH. Burnout in academic faculty of otolaryngology-head and neck surgery. *Laryngoscope* 2008; **118**(11): 1951-6.
43. Golub JS, Weiss PS, Ramesh AK, Ossoff RH, Johns MM, 3rd. Burnout in residents of otolaryngology-head and neck surgery: a national inquiry into the health of residency training. *Acad Med* 2007; **82**(6): 596-601.
44. Govardhan LM, Pinelli V, Schnatz PF. Burnout, depression and job satisfaction in obstetrics and gynecology residents. *Conn Med* 2012; **76**(7): 389-95.
45. Grover S, Sahoo S, Bhalla A, Avasthi A. Psychological problems and burnout among medical professionals of a tertiary care hospital of North India: A cross-sectional study. *Indian Journal of Psychiatry* 2018; **60**(2): 175-88.
46. Gupta K, Lisker S, Rivadeneira NA, Mangurian C, Linos E, Sarkar U. Decisions and repercussions of second victim experiences for mothers in medicine (SAVE DR MoM). *BMJ Qual Saf*. 2019 Jul;28(7):564-573. doi: 10.1136/bmjqs-2018-008372. Epub 2019 Feb 4. PMID: 30718333; PMCID: PMC7173705.
47. Gyórfy Z, Dweik D, Girasek E. Workload, mental health and burnout indicators among female physicians. *Hum Resour Health* 2016; **14**: 12.
48. Gyórfy Z, Dweik D, Girasek E. Willingness to migrate—a potential effect of burnout? A survey of Hungarian physicians. *Human Resources for Health* 2018; **16**(1): 36.
49. Halbesleben JR, Rathert C. Linking physician burnout and patient outcomes: exploring the dyadic relationship between physicians and patients. *Health Care Manage Rev* 2008; **33**(1): 29-39.

50. Hamidi MS, Bohman B, Sandborg C, et al. Estimating institutional physician turnover attributable to self-reported burnout and associated financial burden: a case study. *BMC Health Services Research* 2018; **18**(1): 851.
51. Hansen RP, Vedsted P, Sokolowski I, Søndergaard J, Olesen F. General practitioner characteristics and delay in cancer diagnosis. a population-based cohort study. *BMC Family Practice* 2011; **12**(1): 100.
52. Hartwell JK. Psychological contracts: a new strategy for retaining reduced-hour physicians. *J Med Pract Manage* 2010; **25**(5): 285-97.
53. Hayashino Y, Utsugi-Ozaki M, Feldman MD, Fukuhara S. Hope modified the association between distress and incidence of self-perceived medical errors among practicing physicians: prospective cohort study. *PLoS One* 2012; **7**(4): e35585.
54. Hewitt DB, Ellis RJ, Hu YY, et al. Evaluating the Association of Multiple Burnout Definitions and Thresholds With Prevalence and Outcomes. *JAMA Surg* 2020; **155**(11): 1043-9.
55. Huang EC-H, Pu C, Huang N, Chou Y-J. Resident burnout in Taiwan Hospitals—and its relation to physician felt trust from patients. *Journal of the Formosan Medical Association* 2019; **118**(10): 1438-49.
56. Hyman SA, Shotwell MS, Michaels DR, et al. A Survey Evaluating Burnout, Health Status, Depression, Reported Alcohol and Substance Use, and Social Support of Anesthesiologists. *Anesth Analg* 2017; **125**(6): 2009-18.
57. Jager AJ, Tutty MA, Kao AC. Association Between Physician Burnout and Identification With Medicine as a Calling. *Mayo Clin Proc* 2017; **92**(3): 415-22.
58. Janko MR, Smeds MR. Burnout, depression, perceived stress, and self-efficacy in vascular surgery trainees. *J Vasc Surg* 2019; **69**(4): 1233-42.
59. Kang EK, Lihm HS, Kong EH. Association of intern and resident burnout with self-reported medical errors. *Korean J Fam Med* 2013; **34**(1): 36-42.
60. Karaoglu N, Pekcan S, Durduran Y, Mergen H, Odabasi D, Ors R. A sample of paediatric residents' loneliness-anxiety-depression-burnout and job satisfaction with probable affecting factors. *J Pak Med Assoc* 2015; **65**(2): 183-91.
61. Karayurek Y, Demirci H. Reasons for the relocation of contracted family physicians and job satisfaction. *Family Practice* 2021.
62. Kassam AF, Cortez AR, Winer LK, et al. Extinguishing burnout: National analysis of predictors and effects of burnout in abdominal transplant surgery fellows. *Am J Transplant* 2021; **21**(1): 307-13.
63. Kelker H, Yoder K, Musey P, et al. Prospective study of emergency medicine provider wellness across ten academic and community hospitals during the initial surge of the COVID-19 pandemic. *BMC Emergency Medicine* 2021; **21**(1): 36.
64. Kemper KJ, Schwartz A, Wilson PM, et al. Burnout in Pediatric Residents: Three Years of National Survey Data. *Pediatrics* 2020; **145**(1): e20191030.
65. Khalafallah AM, Lam S, Gami A, et al. Burnout and career satisfaction among attending neurosurgeons during the COVID-19 pandemic. *Clin Neurol Neurosurg* 2020; **198**: 106193.
66. Khalafallah AM, Lam S, Gami A, et al. A national survey on the impact of the COVID-19 pandemic upon burnout and career satisfaction among neurosurgery residents. *J Clin Neurosci* 2020; **80**: 137-42.

67. Khan A, Teoh KR, Islam S, Hassard J. Psychosocial work characteristics, burnout, psychological morbidity symptoms and early retirement intentions: a cross-sectional study of NHS consultants in the UK. *BMJ Open* 2018; **8**(7): e018720.
68. Khorfan R, Hu YY, Agarwal G, et al. The Role of Personal Accomplishment in General Surgery Resident Well-being. *Ann Surg* 2021; **274**(1): 12-7.
69. Kimo Takayesu J, Ramoska EA, Clark TR, et al. Factors associated with burnout during emergency medicine residency. *Acad Emerg Med* 2014; **21**(9): 1031-5.
70. Klein J, Grosse Frie K, Blum K, von dem Knesebeck O. Burnout and perceived quality of care among German clinicians in surgery. *Int J Qual Health Care* 2010; **22**(6): 525-30.
71. Koleck M, Bruchon-Schweitzer M, Thiébaud E, Dumartin N, Sifakis Y. Job stress, coping and burnout among French general practitioners. *European Review of Applied Psychology / Revue Européenne de Psychologie Appliquée* 2000; **50**(3): 309-14.
72. Kriss M, Te HS, Verna EC, VanWagner LB, Scott FI, Lai JC. National Early Career Transplant Hepatologist Survey: Compensation, Burnout, and Job Satisfaction. *Hepatology Communications* 2021; **5**(4): 701-12.
73. Kuerer HM, Eberlein TJ, Pollock RE, et al. Career satisfaction, practice patterns and burnout among surgical oncologists: report on the quality of life of members of the Society of Surgical Oncology. *Ann Surg Oncol* 2007; **14**(11): 3043-53.
74. Kuhn G, Goldberg R, Compton S. Tolerance for uncertainty, burnout, and satisfaction with the career of emergency medicine. *Ann Emerg Med* 2009; **54**(1): 106-13.e6.
75. Kumar S, Fischer J, Robinson E, Hatcher S, Bhagat RN. Burnout and job satisfaction in New Zealand psychiatrists: a national study. *Int J Soc Psychiatry* 2007; **53**(4): 306-16.
76. Kushnir T, Cohen AH. Job structure and burnout among primary care pediatricians. *Work* 2006; **27**(1): 67-74.
77. Kushnir T, Greenberg D, Madjar N, Hadari I, Yermiahu Y, Bachner YG. Is burnout associated with referral rates among primary care physicians in community clinics? *Family Practice* 2013; **31**(1): 44-50.
78. Kwah J, Weintraub J, Fallar R, Ripp J. The Effect of Burnout on Medical Errors and Professionalism in First-Year Internal Medicine Residents. *J Grad Med Educ* 2016; **8**(4): 597-600.
79. Lafreniere JP, Rios R, Packer H, Ghazarian S, Wright SM, Levine RB. Burned Out at the Bedside: Patient Perceptions of Physician Burnout in an Internal Medicine Resident Continuity Clinic. *J Gen Intern Med* 2016; **31**(2): 203-8.
80. Lall MD, Perman SM, Garg N, et al. Intention to Leave Emergency Medicine: Mid-career Women Are at Increased Risk. *West J Emerg Med* 2020; **21**(5): 1131-9.
81. Lavanchy M, Connelly I, Grzybowski S, Michalos AC, Berkowitz J, Thommasen HV. Determinants of Rural Physicians' Life and Job Satisfaction. *Social Indicators Research* 2004; **69**(1): 93-101.
82. Lemkau J, Rafferty J, Gordon R, Jr. Burnout and career-choice regret among family practice physicians in early practice. *Fam Pract Res J* 1994; **14**(3): 213-22.
83. Leung J, Rioseco P, Munro P. Stress, satisfaction and burnout amongst Australian and New Zealand radiation oncologists. *J Med Imaging Radiat Oncol* 2015; **59**(1): 115-24.
84. Levin KH, Shanafelt TD, Keran CM, et al. Burnout, career satisfaction, and well-being among US neurology residents and fellows in 2016. *Neurology* 2017; **89**(5): 492-501.
85. Li H, Zuo M, Gelb AW, et al. Chinese Anesthesiologists Have High Burnout and Low Job Satisfaction: A Cross-Sectional Survey. *Anesth Analg* 2018; **126**(3): 1004-12.

86. Linzer M, Manwell LB, Williams ES, et al. Working conditions in primary care: physician reactions and care quality. *Ann Intern Med* 2009; **151**(1): 28-36, w6-9.
87. Linzer M, Sinsky CA, Poplau S, Brown R, Williams E. Joy In Medical Practice: Clinician Satisfaction In The Healthy Work Place Trial. *Health Aff (Millwood)* 2017; **36**(10): 1808-14.
88. Loerbroks A, Glaser J, Vu-Eickmann P, Angerer P. Physician burnout, work engagement and the quality of patient care. *Occup Med (Lond)* 2017; **67**(5): 356-62.
89. Lu DW, Dresden S, McCloskey C, Branzetti J, Gisondi MA. Impact of Burnout on Self-Reported Patient Care Among Emergency Physicians. *West J Emerg Med* 2015; **16**(7): 996-1001.
90. Makara-Studzińska M, Wontorczyk A, Izydorczyk B. Stress and occupational burnout in a population of Polish doctors - Organizational-professional and non-professional-social predictors. *Ann Agric Environ Med* 2020; **27**(3): 456-68.
91. Marchalik D, C CG, F FLC, et al. Resident burnout in USA and European urology residents: an international concern. *BJU Int* 2019; **124**(2): 349-56.
92. McAbee JH, Ragel BT, McCartney S, et al. Factors associated with career satisfaction and burnout among US neurosurgeons: results of a nationwide survey. *J Neurosurg* 2015; **123**(1): 161-73.
93. McNearney TA, Hunnicutt SE, Maganti R, Rice J. What factors relate to job satisfaction among rheumatologists? *J Clin Rheumatol* 2008; **14**(3): 133-7.
94. Mehta LS, Lewis SJ, Duvernoy CS, et al. Burnout and Career Satisfaction Among U.S. Cardiologists. *J Am Coll Cardiol* 2019; **73**(25): 3345-8.
95. Messerotti A, Banchelli F, Ferrari S, et al. Investigating the association between physicians self-efficacy regarding communication skills and risk of "burnout". *Health Qual Life Outcomes* 2020; **18**(1): 271.
96. Mohammed Y, Maha. Job satisfaction among Iraqi physicians :insight from University hospital. 2018; **29**: 48-65.
97. Moreno-Jiménez B, Gálvez-Herrer M, Rodríguez-Carvajal R, Sanz Vergel AI. A study of physicians' intention to quit: the role of burnout, commitment and difficult doctor-patient interactions. *Psicothema* 2012; **24**(2): 263-70.
98. Nguyen J, Liu A, McKenney M, Liu H, Ang D, Elkbuli A. Impacts and challenges of the COVID-19 pandemic on emergency medicine physicians in the United States. *Am J Emerg Med* 2021; **48**: 38-47.
99. Nwosu ADG, Ossai EN, Mba UC, et al. Physician burnout in Nigeria: a multicentre, cross-sectional study. *BMC Health Services Research* 2020; **20**(1): 863.
100. O'Connor AB, Halvorsen AJ, Cmar JM, et al. Internal Medicine Residency Program Director Burnout and Program Director Turnover: Results of a National Survey. *Am J Med* 2019; **132**(2): 252-61.
101. O'Connor P, Lydon S, O'Dea A, et al. A longitudinal and multicentre study of burnout and error in Irish junior doctors. *Postgrad Med J* 2017; **93**(1105): 660-4.
102. Ochoa P. Impact of Burnout on Organizational Outcomes, the Influence of Legal Demands: The Case of Ecuadorian Physicians. *Front Psychol* 2018; **9**: 662-.
103. Opoku ST, Apenteng BA. Career satisfaction and burnout among Ghanaian physicians. *Int Health* 2014; **6**(1): 54-61.
104. Ožvačić Adžić Z, Katić M, Kern J, Soler JK, Cerovečki V, Polašek O. Is burnout in family physicians in Croatia related to interpersonal quality of care? *Arh Hig Rada Toksikol* 2013; **64**(2): 69-78.

105. Ozyurt A, Hayran O, Sur H. Predictors of burnout and job satisfaction among Turkish physicians. *Qjm* 2006; **99**(3): 161-9.
106. Pantenburg B, Luppia M, König HH, Riedel-Heller SG. Burnout among young physicians and its association with physicians' wishes to leave: results of a survey in Saxony, Germany. *J Occup Med Toxicol* 2016; **11**: 2.
107. Park C, Lee YJ, Hong M, et al. A Multicenter Study Investigating Empathy and Burnout Characteristics in Medical Residents with Various Specialties. *J Korean Med Sci* 2016; **31**(4): 590-7.
108. Passalacqua SA, Segrin C. The effect of resident physician stress, burnout, and empathy on patient-centered communication during the long-call shift. *Health Commun* 2012; **27**(5): 449-56.
109. Pedersen AF, Carlsen AH, Vedsted P. Association of GPs' risk attitudes, level of empathy, and burnout status with PSA testing in primary care. *Br J Gen Pract* 2015; **65**(641): e845-51.
110. Pei P, Lin G, Li G, Zhu Y, Xi X. The association between doctors' presenteeism and job burnout: a cross-sectional survey study in China. *BMC Health Services Research* 2020; **20**(1): 715.
111. Pit SW, Hansen V. Factors influencing early retirement intentions in Australian rural general practitioners. *Occup Med (Lond)* 2014; **64**(4): 297-304.
112. Pit SW, Hansen V. The relationship between lifestyle, occupational health, and work-related factors with presenteeism amongst general practitioners. *Arch Environ Occup Health* 2016; **71**(1): 49-56.
113. Prins JT, van der Heijden FM, Hoekstra-Weebers JE, et al. Burnout, engagement and resident physicians' self-reported errors. *Psychol Health Med* 2009; **14**(6): 654-66.
114. Prudenzi A, D. Graham C, Flaxman PE, O'Connor DB. Wellbeing, burnout, and safe practice among healthcare professionals: predictive influences of mindfulness, values, and self-compassion. *Psychology, Health & Medicine* 2021: 1-14.
115. Pu J, Zhou X, Zhu D, et al. Gender differences in psychological morbidity, burnout, job stress and job satisfaction among Chinese neurologists: a national cross-sectional study. *Psychol Health Med* 2017; **22**(6): 680-92.
116. Qureshi HA, Rawlani R, Mioton LM, Dumanian GA, Kim JYS, Rawlani V. Burnout phenomenon in U.S. plastic surgeons: risk factors and impact on quality of life. *Plast Reconstr Surg* 2015; **135**(2): 619-26.
117. Rabatin J, Williams E, Baier Manwell L, Schwartz MD, Brown RL, Linzer M. Predictors and Outcomes of Burnout in Primary Care Physicians. *J Prim Care Community Health* 2016; **7**(1): 41-3.
118. Rafferty JP, Lemkau JP, Purdy RR, Rudisill JR. Validity of the Maslach Burnout Inventory for family practice physicians. *J Clin Psychol* 1986; **42**(3): 488-92.
119. Rao S, Ferris TG, Hidrue MK, et al. Physician Burnout, Engagement and Career Satisfaction in a Large Academic Medical Practice. *Clin Med Res* 2020; **18**(1): 3-10.
120. Ratanawongsa N, Roter D, Beach MC, et al. Physician burnout and patient-physician communication during primary care encounters. *J Gen Intern Med* 2008; **23**(10): 1581-8.
121. Rath KS, Huffman LB, Phillips GS, Carpenter KM, Fowler JM. Burnout and associated factors among members of the Society of Gynecologic Oncology. *Am J Obstet Gynecol* 2015; **213**(6): 824.e1-9.

122. Roy A, van der Weijden T, de Vries N. Relationships of work characteristics to job satisfaction, turnover intention, and burnout among doctors in the district public-private mixed health system of Bangladesh. *BMC Health Serv Res* 2017; **17**(1): 421.
123. Ruggieri V, Zeppegno P, Gramaglia C, Gili S, Deantonio L, Krengli M. A survey of Italian radiation oncologists: job satisfaction and burnout. *Tumori* 2014; **100**(3): 307-14.
124. Sahin B, Musap lu E, Dogan B, Yildirim A, Arslan T, Sahin H. Profile differences of medical doctors from three different hospitals in Turkey concerning burnout , job satisfaction , and depression. 2019; 2019.
125. Salles A, Wright RC, Milam L, et al. Social Belonging as a Predictor of Surgical Resident Well-being and Attrition. *J Surg Educ* 2019; **76**(2): 370-7.
126. Schaufeli WB, Bakker AB, van der Heijden FMMA, Prins JT. Workaholism, burnout and well-being among junior doctors: The mediating role of role conflict. *Work & Stress* 2009; **23**(2): 155-72.
127. Shanafelt TD, Balch CM, Bechamps G, et al. Burnout and medical errors among American surgeons. *Ann Surg* 2010; **251**(6): 995-1000.
128. Shanafelt TD, Balch CM, Bechamps GJ, et al. Burnout and career satisfaction among American surgeons. *Ann Surg* 2009; **250**(3): 463-71.
129. Shanafelt TD, Bradley KA, Wipf JE, Back AL. Burnout and self-reported patient care in an internal medicine residency program. *Ann Intern Med* 2002; **136**(5): 358-67.
130. Shanafelt TD, Raymond M, Kosty M, et al. Satisfaction with work-life balance and the career and retirement plans of US oncologists. *J Clin Oncol* 2014; **32**(11): 1127-35.
131. Sinsky CA, Dyrbye LN, West CP, Satele D, Tutty M, Shanafelt TD. Professional Satisfaction and the Career Plans of US Physicians. *Mayo Clin Proc* 2017; **92**(11): 1625-35.
132. Siu C, Yuen SK, Cheung A. Burnout among public doctors in Hong Kong: cross-sectional survey. *Hong Kong Med J* 2012; **18**(3): 186-92.
133. Sliwa JA, Clark GS, Chiodo A, et al. Burnout in Diplomates of the American Board of Physical Medicine and Rehabilitation-Prevalence and Potential Drivers: A Prospective Cross-Sectional Survey. *Pm r* 2019; **11**(1): 83-9.
134. Soler J, Yaman H, Esteva M, et al. Burnout in European family doctors: The EGPRN study. *Family Practice* 2008; **25**: 245-65.
135. Sonmez LO, Gul M. Occupational burnout, job satisfaction and anxiety among emergency medicine doctors in Turkey. *Pak J Med Sci* 2021; **37**(3): 757-63.
136. Stafford L, Judd F. Mental health and occupational wellbeing of Australian gynaecologic oncologists. *Gynecologic Oncology* 2010; **116**(3): 526-32.
137. Sulaiman CFC, Henn P, Smith S, O'Tuathaigh CMP. Burnout syndrome among non-consultant hospital doctors in Ireland: Relationship with self-reported patient care. *International Journal for Quality in Health Care* 2017; **29**(5): 679-84.
138. Sun BZ, Chaitoff A, Hu B, Neuendorf K, Manne M, Rothberg MB. Empathy, burnout, and antibiotic prescribing for acute respiratory infections: a cross-sectional primary care study in the US. *Br J Gen Pract* 2017; **67**(661): e565-e71.



139. Sun T, Wang J, Zhang Se, Shi Y, Liu B, Wang X. Status, causes and consequences of physicians' self-perceived professional reputation damage in China: a cross-sectional survey. *BMC health services research* 2021; **21**(1): 344-.
140. Surgenor LJ, Spearing RL, Horn J, Beautrais AL, Mulder RT, Chen P. Burnout in hospital-based medical consultants in the New Zealand public health system. *N Z Med J* 2009; **122**(1300): 11-8.
141. Tak HJ, Curlin FA, Yoon JD. Association of Intrinsic Motivating Factors and Markers of Physician Well-Being: A National Physician Survey. *J Gen Intern Med* 2017; **32**(7): 739-46.
142. Tawfik DS, Profit J, Morgenthaler TI, et al. Physician Burnout, Well-being, and Work Unit Safety Grades in Relationship to Reported Medical Errors. *Mayo Clinic Proceedings* 2018; **93**(11): 1571-80.
143. Taycan O, Erdoğan Taycan S, Çelik C. [The impact of compulsory health service on physicians and burnout in a province in Eastern Anatolia]. *Turk Psikiyatri Derg* 2013; **24**(3): 182-91.
144. Tian L, Pu J, Liu Y, et al. Relationship between burnout and career choice regret among Chinese neurology postgraduates. *BMC Medical Education* 2019; **19**(1): 162.
145. Tokuda Y, Hayano K, Ozaki M, Bito S, Yanai H, Koizumi S. The interrelationships between working conditions, job satisfaction, burnout and mental health among hospital physicians in Japan: a path analysis. *Ind Health* 2009; **47**(2): 166-72.
146. Toral-Villanueva R, Aguilar-Madrid G, Juárez-Pérez CA. Burnout and patient care in junior doctors in Mexico City. *Occup Med (Lond)* 2009; **59**(1): 8-13.
147. Torppa MA, Kuikka L, Nevalainen M, Pitkälä KH. Emotionally exhausting factors in general practitioners' work. *Scand J Prim Health Care* 2015; **33**(3): 178-83.
148. Trockel M, Bohman B, Lesure E, et al. A Brief Instrument to Assess Both Burnout and Professional Fulfillment in Physicians: Reliability and Validity, Including Correlation with Self-Reported Medical Errors, in a Sample of Resident and Practicing Physicians. *Acad Psychiatry* 2018; **42**(1): 11-24.
149. Umene-Nakano W, Kato TA, Kikuchi S, et al. Nationwide survey of work environment, work-life balance and burnout among psychiatrists in Japan. *PLoS One* 2013; **8**(2): e55189.
150. van Wulfften Palthe OD, Neuhaus V, Janssen SJ, Guitton TG, Ring D. Among Musculoskeletal Surgeons, Job Dissatisfaction Is Associated With Burnout. *Clin Orthop Relat Res* 2016; **474**(8): 1857-63.
151. Vanhaecht K, Seys D, Schouten L, et al. Duration of second victim symptoms in the aftermath of a patient safety incident and association with the level of patient harm: a cross-sectional study in the Netherlands. *BMJ Open* 2019; **9**(7): e029923.
152. Visser MRM, Smets EMA, Oort FJ, De Haes HCJM. Stress, satisfaction and burnout among Dutch medical specialists. *CMAJ* 2003; **168**(3): 271-5.
153. Voultos P, Koungali M, Psaroulis K, Boutou AK. Burnout syndrome and its association with anxiety and fear of medical errors among intensive care unit physicians: A cross-sectional study. *Anaesth Intensive Care* 2020; **48**(2): 134-42.
154. Walocha E, Tomaszewski KA, Wilczek-Ruzyczka E, Walocha J. Empathy and burnout among physicians of different specialities. *Folia Med Cracov* 2013; **53**(2): 35-42.

155. Ward ZD, Morgan ZJ, Peterson LE. Family Physician Burnout Does Not Differ With Rurality. *The Journal of Rural Health*; **n/a**(n/a).
156. Watson A, McCoy J, Mathew J, Gundersen D, Eisenstein R. Impact of physician workload on burnout in the emergency department. *Psychology, Health & Medicine* 2018; **24**: 1-15.
157. Weigl M, Schneider A, Hoffmann F, Angerer P. Work stress, burnout, and perceived quality of care: a cross-sectional study among hospital pediatricians. *Eur J Pediatr* 2015; **174**(9): 1237-46.
158. Weigl, M., & Schneider, A. (2017). Associations of work characteristics, employee strain and self-perceived quality of care in Emergency Departments: A cross-sectional study. *International Emergency Nursing*, 30, 20-24.
159. Welle D, Trockel MT, Hamidi MS, et al. Association of Occupational Distress and Sleep-Related Impairment in Physicians With Unsolicited Patient Complaints. *Mayo Clin Proc* 2020; **95**(4): 719-26.
160. Welp A, Meier LL, Manser T. Emotional exhaustion and workload predict clinician-rated and objective patient safety. *Front Psychol* 2014; **5**: 1573.
161. Wen J, Cheng Y, Hu X, Yuan P, Hao T, Shi Y. Workload, burnout, and medical mistakes among physicians in China: A cross-sectional study. *Biosci Trends* 2016; **10**(1): 27-33.
162. Weng HC, Hung CM, Liu YT, et al. Associations between emotional intelligence and doctor burnout, job satisfaction and patient satisfaction. *Med Educ* 2011; **45**(8): 835-42.
163. West CP, Huschka MM, Novotny PJ, et al. Association of perceived medical errors with resident distress and empathy: a prospective longitudinal study. *Jama* 2006; **296**(9): 1071-8.
164. West CP, Tan AD, Habermann TM, Sloan JA, Shanafelt TD. Association of resident fatigue and distress with perceived medical errors. *Jama* 2009; **302**(12): 1294-300.
165. Whitebird RR, Solberg LI, Crain AL, et al. Clinician burnout and satisfaction with resources in caring for complex patients. *Gen Hosp Psychiatry* 2017; **44**: 91-5.
166. Willard-Grace R, Knox M, Huang B, Hammer H, Kivlahan C, Grumbach K. Burnout and Health Care Workforce Turnover. *Ann Fam Med* 2019; **17**(1): 36-41.
167. Williams ES, Manwell LB, Konrad TR, Linzer M. The relationship of organizational culture, stress, satisfaction, and burnout with physician-reported error and suboptimal patient care: results from the MEMO study. *Health Care Manage Rev* 2007; **32**(3): 203-12.
168. Williamson K, Lank PM, Cheema N, Hartman N, Lovell EO. Comparing the Maslach Burnout Inventory to Other Well-Being Instruments in Emergency Medicine Residents. *J Grad Med Educ* 2018; **10**(5): 532-6.
169. Wright JG, Khetani N, Stephens D. Burnout among faculty physicians in an academic health science centre. *Paediatr Child Health* 2011; **16**(7): 409-13.
170. Xiao Y, Wang J, Chen S, et al. Psychological distress, burnout level and job satisfaction in emergency medicine: A cross-sectional study of physicians in China. *Emerg Med Australas* 2014; **26**(6): 538-42.
171. Yost MG, Johnson JC, Johns MM, 3rd, Burchett KD. Burnout among osteopathic otolaryngology residents: identification during formative training years. *J Am Osteopath Assoc* 2014; **114**(8): 632-41.

172. Yuguero Torres O, Esquerda Aresté M, Marsal Mora JR, Soler-González J. Association between Sick Leave Prescribing Practices and Physician Burnout and Empathy. *PLoS One* 2015; **10**(7): e0133379.
173. Zhang Y, Feng X. The relationship between job satisfaction, burnout, and turnover intention among physicians from urban state-owned medical institutions in Hubei, China: a cross-sectional study. *BMC Health Serv Res* 2011; **11**: 235.
174. Zhou X, Pu J, Zhong X, et al. Burnout, psychological morbidity, job stress, and job satisfaction in Chinese neurologists. *Neurology* 2017; **88**(18): 1727-35.

**Citations for excluded studies with non-amenable data (as denoted in PRISMA flow diagram)**

1. Balch CM, Freischlag JA, Shanafelt TD. Stress and burnout among surgeons: understanding and managing the syndrome and avoiding the adverse consequences. *Arch Surg* 2009; **144**(4): 371-6.
2. Beasley BW, Kern DE, Kolodner K. Job turnover and its correlates among residency program directors in internal medicine: a three-year cohort study. *Acad Med* 2001; **76**(11): 1127-35.
3. Becker JL, Milad MP, Klock SC. Burnout, depression, and career satisfaction: cross-sectional study of obstetrics and gynecology residents. *Am J Obstet Gynecol* 2006; **195**(5): 1444-9.
4. Bertges Yost W, Eshelman A, Raoufi M, Abouljoud MS. A national study of burnout among American transplant surgeons. *Transplant Proc* 2005; **37**(2): 1399-401.
5. Block L, Wu AW, Feldman L, Yeh HC, Desai SV. Residency schedule, burnout and patient care among first-year residents. *Postgrad Med J* 2013; **89**(1055): 495-500.
6. Bourne T, De Cock B, Wynants L, et al. Doctors' perception of support and the processes involved in complaints investigations and how these relate to welfare and defensive practice: a cross-sectional survey of the UK physicians. *BMJ Open* 2017; **7**(11): e017856.
7. Bourne T, Wynants L, Peters M, et al. The impact of complaints procedures on the welfare, health and clinical practise of 7926 doctors in the UK: a cross-sectional survey. *BMJ Open* 2015; **5**(1): e006687.
8. Bovier PA, Arigoni F, Schneider M, Gallacchi MB. Relationships between work satisfaction, emotional exhaustion and mental health among Swiss primary care physicians. *Eur J Public Health* 2009; **19**(6): 611-7.
9. Coleman DM, Money SR, Meltzer AJ, et al. Vascular surgeon wellness and burnout: A report from the Society for Vascular Surgery Wellness Task Force. *Journal of Vascular Surgery* 2021; **73**(6): 1841-50.e3.

10. Dinibutun SR. Factors Associated with Burnout Among Physicians: An Evaluation During a Period of COVID-19 Pandemic. *J Healthc Leadersh* 2020; **12**: 85-94.
11. Dollarhide AW, Rutledge T, Weinger MB, et al. A Real-Time Assessment of Factors Influencing Medication Events. *Journal for Healthcare Quality* 2014; **36**(5): 5-12.
12. Dreher A, Theune M, Kersting C, Geiser F, Weltermann B. Prevalence of burnout among German general practitioners: Comparison of physicians working in solo and group practices. *PLoS One* 2019; **14**(2): e0211223.
13. Dyrbye LN, Burke SE, Hardeman RR, et al. Association of Clinical Specialty With Symptoms of Burnout and Career Choice Regret Among US Resident Physicians. *Jama* 2018; **320**(11): 1114-30.
14. Dyrbye LN, Shanafelt TD, Balch CM, Satele D, Sloan J, Freischlag J. Relationship between work-home conflicts and burnout among American surgeons: a comparison by sex. *Arch Surg* 2011; **146**(2): 211-7.
15. Dyrbye LN, Varkey P, Boone SL, Satele DV, Sloan JA, Shanafelt TD. Physician satisfaction and burnout at different career stages. *Mayo Clin Proc* 2013; **88**(12): 1358-67.
16. Eckleberry-Hunt J, Kirkpatrick H, Taku K, Hunt R. Self-Report Study of Predictors of Physician Wellness, Burnout, and Quality of Patient Care. *South Med J* 2017; **110**(4): 244-8.
17. El Kettani A, Serhier Z, Othmani MB, Agoub M, Battas O. [Evaluation of burnout syndrome among doctors in training at the Ibn Rochd University Hospital, Casablanca]. *Pan Afr Med J* 2017; **27**: 243.
18. Fargen KM, Arthur AS, Leslie-Mazwi T, et al. A survey of burnout and professional satisfaction among United States neurointerventionalists. *Journal of NeuroInterventional Surgery* 2019; **11**(11): 1100-4.
19. Gan Y, Jiang H, Li L, et al. Prevalence of burnout and associated factors among general practitioners in Hubei, China: a cross-sectional study. *BMC Public Health* 2019; **19**(1): 1607.
20. Granek L, Ben-David M, Nakash O, et al. Oncologists' negative attitudes towards expressing emotion over patient death and burnout. *Support Care Cancer* 2017; **25**(5): 1607-14.
21. Granek L, Nakash O, Cohen M, Ben-David M, Ariad S. Oncologists' communication about end of life: the relationship among secondary traumatic stress, compassion satisfaction, and approach and avoidance communication. *Psycho-Oncology* 2017; **26**(11): 1980-6.
22. Grossman Z, Chodick G, Kushnir T, Cohen HA, Chapnick G, Ashkenazi S. Burnout and intentions to quit the practice among community pediatricians: associations with specific professional activities. *Israel Journal of Health Policy Research* 2019; **8**: NA.
23. Hall LH, Johnson J, Watt I, O'Connor DB. Association of GP wellbeing and burnout with patient safety in UK primary care: a cross-sectional survey. *British Journal of General Practice* 2019; **69**(684): e507-e14.
24. Hinami K, Whelan CT, Wolosin RJ, Miller JA, Wetterneck TB. Worklife and satisfaction of hospitalists: toward flourishing careers. *J Gen Intern Med* 2012; **27**(1): 28-36.
25. Huber MT, Ham SA, Qayyum M, et al. Association between Job Factors, Burnout, and Preference for a New Job: a Nationally Representative Physician Survey. *J Gen Intern Med* 2018; **33**(6): 789-91.

26. Johns MM, 3rd, Ossoff RH. Burnout in academic chairs of otolaryngology: head and neck surgery. *Laryngoscope* 2005; **115**(11): 2056-61.
27. Kalmbach DA, Arnedt JT, Song PX, Guille C, Sen S. Sleep Disturbance and Short Sleep as Risk Factors for Depression and Perceived Medical Errors in First-Year Residents. *Sleep* 2017; **40**(3).
28. Krebs EE, Garrett JM, Konrad TR. The difficult doctor? Characteristics of physicians who report frustration with patients: an analysis of survey data. *BMC Health Serv Res* 2006; **6**: 128.
29. Kumar S, Hatcher S, Dutu G, Fischer J, Ma'u E. Stresses experienced by psychiatrists and their role in burnout: a national follow-up study. *Int J Soc Psychiatry* 2011; **57**(2): 166-79.
30. Kumar S, Sinha P, Dutu G. Being satisfied at work does affect burnout among psychiatrists: a national follow-up study from New Zealand. *Int J Soc Psychiatry* 2013; **59**(5): 460-7.
31. LaFaver K, Miyasaki JM, Keran CM, et al. Age and sex differences in burnout, career satisfaction, and well-being in US neurologists. *Neurology* 2018; **91**(20): e1928-e41.
32. Lal A, Tharyan A, Tharyan P. The prevalence, determinants and the role of empathy and religious or spiritual beliefs on job stress, job satisfaction, coping, burnout, and mental health in medical and surgical faculty of a teaching hospital: A cross-sectional survey. *Rev Med Interne* 2020; **41**(4): 232-40.
33. Lloyd S, Streiner D, Hahn E, Shannon S. Development of the emergency physician job satisfaction measurement instrument. *Am J Emerg Med* 1994; **12**(1): 1-10.
34. Mazhar SB, Gilani S, Ain QT, Khan S. High burn out among doctors working in a tertiary care hospital; a wakeup call. *J Pak Med Assoc* 2019; **69**(3): 349-54.
35. Menon NK, Shanafelt TD, Sinsky CA, et al. Association of Physician Burnout With Suicidal Ideation and Medical Errors. *JAMA Network Open* 2020; **3**(12): e2028780-e.
36. Mikalauskas A, Širvinskas E, Marchertienė I, et al. Burnout among Lithuanian cardiac surgeons and cardiac anesthesiologists. *Medicina (Kaunas)* 2012; **48**(9): 478-84.
37. Mohr D, Eaton J, Meterko M, Stolzmann K, Restuccia J. Factors associated with internal medicine physician job attitudes in the Veterans Health Administration. *BMC health services research* 2018; **18**: 244.
38. Moore LR, Ziegler C, Hessler A, Singhal D, LaFaver K. Burnout and Career Satisfaction in Women Neurologists in the United States. *J Womens Health (Larchmt)* 2019; **28**(4): 515-25.
39. Picquendar G, Guedon A, Moulinet F, Schuers M. Influence of medical shortage on GP burnout: a cross-sectional study. *Fam Pract* 2019; **36**(3): 291-6.
40. Raptis DA, Schlegel A, Tschuor C, Clavien PA. Job satisfaction among young board-certified surgeons at academic centers in Europe and North America. *Ann Surg* 2012; **256**(5): 796-803; discussion -5.
41. Shanafelt TD, Mungo M, Schmitgen J, et al. Longitudinal Study Evaluating the Association Between Physician Burnout and Changes in Professional Work Effort. *Mayo Clin Proc* 2016; **91**(4): 422-31.
42. Shanafelt TD, West C, Zhao X, et al. Relationship between increased personal well-being and enhanced empathy among internal medicine residents. *J Gen Intern Med* 2005; **20**(7): 559-64.

43. Sharma A, Sharp DM, Walker LG, Monson JR. Stress and burnout in colorectal and vascular surgical consultants working in the UK National Health Service. *Psychooncology* 2008; **17**(6): 570-6.
44. Sheno AN, Kalyanaraman M, Pillai A, Raghava PS, Day S. Burnout and Psychological Distress Among Pediatric Critical Care Physicians in the United States. *Crit Care Med* 2018; **46**(1): 116-22.
45. Stodel JM, Stewart-Smith A. The influence of burnout on skills retention of junior doctors at Red Cross War Memorial Children's Hospital: a case study. *S Afr Med J* 2011; **101**(2): 115-8.
46. Thommasen HV, Lavanchy M, Connelly I, Berkowitz J, Grzybowski S. Mental health, job satisfaction, and intention to relocate. Opinions of physicians in rural British Columbia. *Can Fam Physician* 2001; **47**: 737-44.
47. Travado L, Grassi L, Gil F, Ventura C, Martins C. Physician-patient communication among Southern European cancer physicians: the influence of psychosocial orientation and burnout. *Psychooncology* 2005; **14**(8): 661-70.
48. Trockel MT, Menon NK, Rowe SG, et al. Assessment of Physician Sleep and Wellness, Burnout, and Clinically Significant Medical Errors. *JAMA Network Open* 2020; **3**(12): e2028111-e.
49. van den Hombergh P, Künzi B, Elwyn G, et al. High workload and job stress are associated with lower practice performance in general practice: an observational study in 239 general practices in the Netherlands. *BMC Health Serv Res* 2009; **9**: 118.

## Appendix 8: Subgroup analysis of the different burnout measures used

### Breakdown of the type of burnout measures used across the 170 studies

| Burnout measure used | Number of studies (%) |
|----------------------|-----------------------|
| Full MBI             | 81 (48%)              |
| MBI abbreviated*     | 50 (29%)              |
| Copenhagen           | 5 (3%)                |
| Other*               | 34 (20%)              |

\*See full details of the measure used for each study in appendix 9.

### Subgroup meta-analysis for the measure of burnout used for outcomes job satisfaction, patient safety incidents, professionalism and turnover intention

| Outcome                  | Burnout Measure (OR (95% CI), I <sup>2</sup> )* |                                           |                                           |                                        |
|--------------------------|-------------------------------------------------|-------------------------------------------|-------------------------------------------|----------------------------------------|
|                          | Full MBI                                        | MBI abbreviated                           | Copenhagen                                | Other                                  |
| Job satisfaction         | 3.39 (2.69, 4.29),<br>I <sup>2</sup> =83%       | 4.62 (3.21, 6.65),<br>I <sup>2</sup> =99% | 2.59 (2.22, 3.01),<br>I <sup>2</sup> =95% | 4.06 (3.04, 5.43), I <sup>2</sup> =88% |
| Patient safety incidents | 2.12 (1.68, 2.67),<br>I <sup>2</sup> =96%       | 1.68 (1.16, 2.43),<br>I <sup>2</sup> =79% | 3.59 (2.92, 4.42),<br>I <sup>2</sup> =95% | 1.99 (0.85, 4.63), I <sup>2</sup> =95% |
| Professionalism          | 2.42 (1.93, 3.04),<br>I <sup>2</sup> =97%       | 2.91 (1.65, 5.13),<br>I <sup>2</sup> =87% | 1.89 (1.69, 2.12),<br>I <sup>2</sup> =43% | 1.91 (1.15, 3.18), I <sup>2</sup> =95% |
| Turnover Intention       | 2.68 (1.75, 4.11),<br>I <sup>2</sup> =65%       | 2.53 (1.39, 4.59),<br>I <sup>2</sup> =98% | 2.77 (2.25, 3.40),<br>I <sup>2</sup> =96% | 7.23 (5.93, 8.81), I <sup>2</sup> =77% |

MBI: Maslach Burnout Inventory; OR: odds ratio; CI: confidence interval.

\*All of the above ORs between the burnout measures groups were assessed for significant differences using the Ratio of Odds Ratio (ROR) statistic. Applying this approach we did not find any significant differences.

## Appendix 9: NOS Critical Appraisal and Descriptions for Measure of Wellness

| Study                | Description for Measure of wellness                                                                                      | MBI | Subgroups       | Newcastle Ottawa assessment  |             |                 |                               |                     |                       |                  |             |
|----------------------|--------------------------------------------------------------------------------------------------------------------------|-----|-----------------|------------------------------|-------------|-----------------|-------------------------------|---------------------|-----------------------|------------------|-------------|
|                      |                                                                                                                          |     |                 | Selection                    |             |                 |                               | Comparability       | Outcome               |                  | Total Score |
|                      |                                                                                                                          |     |                 | Representativeness of sample | Sample size | Non-respondents | Ascertainment of the exposure | Confounding factors | Assessment of outcome | Statistical test |             |
| Adarkwah 2018        | 22 item MBI                                                                                                              | 1   | Full MBI        | 1                            | 1           | 0               | 0                             | 0                   | 1                     | 1                | 4           |
| Al dubai 2013        | 9 item EE                                                                                                                | 1   | MBI Abbreviated | 1                            | 0           | 1               | 0                             | 1                   | 1                     | 1                | 5           |
| Alrawashdeh 2021     | 10-item Burnout Measure-Short version (BMS) by Maslach-Pines                                                             | 1   | MBI Abbreviated | 1                            | 1           | 1               | 0                             | 1                   | 1                     | 1                | 6           |
| Anagnostopoulos 2012 | Burnout measured using Maslach Burnout Inventory full 22-item version                                                    | 1   | Full MBI        | 1                            | 0           | 1               | 0                             | 1                   | 1                     | 1                | 5           |
| Appelbaum 2019       | 9 items from the MBI                                                                                                     | 1   | MBI Abbreviated | 1                            | 0           | 0               | 0                             | 1                   | 1                     | 0                | 3           |
| Arora 2014           | 22 item MBI                                                                                                              | 1   | Full MBI        | 1                            | 1           | 0               | 0                             | 0                   | 0                     | 0                | 2           |
| Asai 2013            | Burnout measured using Maslach Burnout Inventory; Emotional distress using the General health questionnaire              | 1   | Full MBI        | 1                            | 1           | 1               | 0                             | 1                   | 1                     | 1                | 6           |
| Attenello 2018       | 22 item MBI                                                                                                              | 1   | Full MBI        | 1                            | 1           | 0               | 0                             | 1                   | 1                     | 1                | 5           |
| Baer 2017            | 2-single item measure adapted from Maslach Burnout Inventory                                                             | 1   | Full MBI        | 1                            | 1           | 0               | 0                             | 1                   | 1                     | 1                | 5           |
| Baghdadi 2020        | Adapted version of the MBI                                                                                               | 1   | MBI Abbreviated | 0                            | 1           | 1               | 0                             | 0                   | 1                     | 0                | 3           |
| Bahadirli 2021       | 22 item MBI                                                                                                              | 1   | Full MBI        | 1                            | 1           | 0               | 0                             | 0                   | 1                     | 1                | 4           |
| Balch 2011           | 22-item of Maslach Burnout Inventory; Depression using the 2-item Primary Care Evaluation of Mental Disorders (PRIME MD) | 1   | Full MBI        | 1                            | 1           | 0               | 0                             | 1                   | 1                     | 1                | 5           |
| Blanchard 2010       | 22 item MBI                                                                                                              | 1   | Full MBI        | 0                            | 1           | 0               | 0                             | 1                   | 1                     | 1                | 4           |
| Bourne 2019          | 22 item MBI                                                                                                              | 1   | Full MBI        | 1                            | 1           | 0               | 0                             | 1                   | 1                     | 1                | 5           |
| Bressi 2009          | 22 item MBI                                                                                                              | 1   | Full MBI        | 1                            | 0           | 1               | 0                             | 0                   | 1                     | 1                | 4           |
| Brown 2009           | Burnout measured using Maslach Burnout Inventory;                                                                        | 1   | Full MBI        | 1                            | 0           | 0               | 1                             | 0                   | 1                     | 0                | 3           |



|                      |                                                                                                                   |   |                 |   |   |   |   |   |   |   |   |
|----------------------|-------------------------------------------------------------------------------------------------------------------|---|-----------------|---|---|---|---|---|---|---|---|
|                      | Depression/anxiety using the Depression Anxiety Stress Scale (DASS)                                               |   |                 |   |   |   |   |   |   |   |   |
| Brunsborg 2019       | burnout MBI, depression HANDS                                                                                     | 1 | Full MBI        | 1 | 1 | 1 | 1 | 0 | 1 | 1 | 6 |
| Buis 2017            | 22 item MBI                                                                                                       | 1 | Full MBI        | 1 | 1 | 0 | 0 | 1 | 1 | 1 | 5 |
| Campbell 2001        | 22 item MBI                                                                                                       | 1 | Full MBI        | 0 | 0 | 0 | 0 | 0 | 1 | 0 | 1 |
| Chen 2013            | 22 item MBI                                                                                                       | 1 | Full MBI        | 0 | 1 | 1 | 0 | 0 | 1 | 1 | 4 |
| Cooke 2013           | Burnout measured using a single item measure of MBI which was validated against the emotional exhaustion subscale | 1 | Full MBI        | 1 | 1 | 1 | 0 | 0 | 1 | 0 | 4 |
| Coombs 2019, 2020    | 22 item MBI                                                                                                       | 1 | Full MBI        | 1 | 0 | 0 | 0 | 0 | 1 | 0 | 2 |
| Cydulka 2008         | 1 question on burnout                                                                                             | 0 | Other           | 1 | 1 | 1 | 0 | 1 | 1 | 1 | 6 |
| de Oliveira 2013     | Burnout measured using MBI but shortened to 12-items                                                              | 1 | Full MBI        | 1 | 0 | 1 | 0 | 0 | 1 | 1 | 4 |
| Dewa 2014            | 9 item burnout MBI                                                                                                | 1 | MBI Abbreviated | 1 | 1 | 0 | 0 | 0 | 1 | 1 | 4 |
| Ding 2019            | 1 question on burnout                                                                                             | 0 | Other           | 1 | 0 | 0 | 0 | 0 | 1 | 0 | 2 |
| Dirvar 2021          | MBI- 22 item                                                                                                      | 1 | Full MBI        | 0 | 1 | 1 | 0 | 1 | 1 | 0 | 4 |
| Djulfbegovic 2019    | Adapted Burnout Scale used                                                                                        | 0 | MBI Abbreviated | 1 | 0 | 1 | 0 | 0 | 1 | 0 | 3 |
| Doan-Wiggans 1995    | 1 question on burnout                                                                                             | 0 | Other           | 1 | 1 | 0 | 0 | 0 | 1 | 0 | 3 |
| Dominguez 2018, 2019 | MBI 22 item                                                                                                       | 1 | Full MBI        | 1 | 1 | 0 | 0 | 0 | 1 | 0 | 3 |
| Duan 2019            | 15 items of the MBI-GS                                                                                            | 1 | MBI Abbreviated | 1 | 0 | 0 | 0 | 0 | 1 | 0 | 2 |
| Estryn-Behar 2011    | Inventory, the Maslach Burnout Inventory, Copenhagen Burnout Inventory                                            | 0 | Copenhagen      | 1 | 1 | 0 | 0 | 1 | 1 | 1 | 5 |
| Faivre 2018          | Full 22-item MBI                                                                                                  | 1 | Full MBI        | 1 | 0 | 0 | 0 | 1 | 1 | 1 | 4 |
| Fahrenkopf 2008      | Harvard national depression screening day scale + Maslach burnout inventory                                       | 1 | MBI Abbreviated | 1 | 0 | 0 | 0 | 1 | 1 | 0 | 3 |
| Freeborn 2001        | Burnout (Tedium index)                                                                                            | 0 | Other           | 1 | 1 | 0 | 0 | 0 | 1 | 0 | 3 |
| Garroute-Orgeas 2015 | Maslach Burnout Inventory (MBI), CES-Depression scale                                                             | 1 | MBI Abbreviated | 1 | 1 | 0 | 1 | 1 | 1 | 0 | 5 |
| Gilles 2014          | Copenhagen Burnout Inventory                                                                                      | 0 | Copenhagen      | 1 | 1 | 0 | 0 | 0 | 1 | 0 | 3 |

|                            |                                                                                                                                                               |   |                 |   |   |   |   |   |   |   |   |
|----------------------------|---------------------------------------------------------------------------------------------------------------------------------------------------------------|---|-----------------|---|---|---|---|---|---|---|---|
| Glasheen 2011              | n/r                                                                                                                                                           | 0 | Other           | 0 | 0 | 0 | 0 | 0 | 1 | 0 | 1 |
| Goldberg 1996              | Full 23-item MBI                                                                                                                                              | 1 | Full MBI        | 0 | 0 | 0 | 0 | 0 | 1 | 0 | 1 |
| Golub 2007                 | Full 22-item MBI-HSS                                                                                                                                          | 1 | Full MBI        | 1 | 1 | 0 | 0 | 0 | 1 | 0 | 3 |
| Golub 2008                 | MBI HSS                                                                                                                                                       | 1 | Other           | 1 | 0 | 0 | 0 | 0 | 1 | 0 | 2 |
| Govardhan 2012             | Full 22-item MBI-HSS                                                                                                                                          | 1 | Full MBI        | 1 | 0 | 0 | 0 | 0 | 1 | 0 | 2 |
| Grover 2018                | MBI and PSS                                                                                                                                                   | 1 | MBI Abbreviated | 1 | 0 | 0 | 0 | 0 | 1 | 0 | 2 |
| Halbesleben 2008           | Maslach Burnout Inventory                                                                                                                                     | 1 | MBI Abbreviated | 1 | 0 | 0 | 0 | 1 | 1 | 0 | 3 |
| Hamidi 2018                | Full 22-item MBI-HSS                                                                                                                                          | 1 | Full MBI        | 1 | 0 | 0 | 0 | 1 | 1 | 1 | 4 |
| Hansen 2011                | The Warr-Cook-Wall job satisfaction scales, the Maslach Burnout Inventory and survey items on working hours and participation in continuing medical education | 1 | MBI Abbreviated | 1 | 0 | 0 | 1 | 1 | 1 | 0 | 4 |
| Hartwell 2010              | 16 items of the MBI modified by Barnett                                                                                                                       | 1 | MBI Abbreviated | 1 | 0 | 0 | 0 | 1 | 1 | 0 | 3 |
| Hayashino 2012             | HOPE scale + Maslach Burnout Inventory + WHO depression index                                                                                                 | 1 | MBI Abbreviated | 1 | 1 | 0 | 0 | 1 | 1 | 0 | 4 |
| Hewitt 2020                | Modified abbreviated MBI-HSS                                                                                                                                  | 1 | MBI Abbreviated | 1 | 1 | 0 | 0 | 1 | 1 | 0 | 4 |
| Huang 2019                 | Chinese version of Copenhagen burnout inventory                                                                                                               | 0 | Copenhagen      | 1 | 1 | 0 | 0 | 0 | 1 | 1 | 4 |
| Hyman 2017                 | Full 22-item MBI-HSS                                                                                                                                          | 1 | Full MBI        | 0 | 0 | 0 | 0 | 0 | 1 | 0 | 1 |
| Jager 2017                 | Full 22-item MBI                                                                                                                                              | 1 | Full MBI        | 1 | 1 | 1 | 0 | 1 | 1 | 1 | 6 |
| Janko 2019                 | Oldenburg burnout inventory                                                                                                                                   | 0 | Other           | 1 | 0 | 0 | 0 | 0 | 1 | 1 | 3 |
| Kang 2013                  | Maslach Burnout Inventory; Two item measure of depression                                                                                                     | 1 | MBI Abbreviated | 0 | 0 | 0 | 0 | 0 | 1 | 1 | 2 |
| Karaoglu 2015              | Full 22-item MBI                                                                                                                                              | 1 | Full MBI        | 0 | 0 | 0 | 0 | 0 | 1 | 0 | 1 |
| Karayurek and Demirci 2021 | MBI 22 item (Turkish adaption)                                                                                                                                | 1 | Full MBI        | 1 | 1 | 0 | 0 | 0 | 1 | 0 | 3 |
| Kassam 2021                | Full 22-item MBI                                                                                                                                              | 1 | Full MBI        | 1 | 0 | 0 | 0 | 0 | 1 | 0 | 2 |
| Kelker 2021                | Wellbeing index; physician work life study item; Brief resilience scale (BRS)                                                                                 | 0 | Other           | 1 | 0 | 0 | 0 | 1 | 1 | 1 | 4 |
| Kemper 2020                | Full 22-item MBI-HSS                                                                                                                                          | 1 | Full MBI        | 1 | 1 | 1 | 0 | 1 | 1 | 1 | 6 |

|                    |                                                                                                                                                                                                                                                                                                                                                                                                             |   |                 |   |   |   |   |   |   |   |   |
|--------------------|-------------------------------------------------------------------------------------------------------------------------------------------------------------------------------------------------------------------------------------------------------------------------------------------------------------------------------------------------------------------------------------------------------------|---|-----------------|---|---|---|---|---|---|---|---|
| Khalafallah 2020a  | 9-item abbreviated measure of the MBI contains all three subscales. Two burnout indexes were created for the purposes of analysis: one named 'burnout' where participants scored as high on either EE or DP; one named 'career satisfaction' which reflected PA scores.                                                                                                                                     | 1 | MBI Abbreviated | 1 | 0 | 0 | 0 | 1 | 1 | 1 | 4 |
| Khan 2018          | The Maslach Burnout Inventory was used to measure emotional exhaustion (nine items) and depersonalisation (five items). Scores on the two measures were combined to stratify participants as 'high' and 'low' burnout. Depression and anxiety were measured using the State Trait Personality Inventory. These scales were also stratified to class participants as 'high' or 'low' depression and anxiety. | 1 | MBI Abbreviated | 0 | 1 | 0 | 0 | 1 | 1 | 1 | 4 |
| Khorfan 2021       | abbreviated Maslach Burnout Inventory includes three questions for each of the three subscales (emotional exhaustion, depersonalization, and personal accomplishment) and has been shown to be a valid and reliable screening tool for burnout                                                                                                                                                              | 1 | Full MBI        | 1 | 1 | 1 | 0 | 1 | 1 | 1 | 6 |
| Kimo Takayesu 2014 | The 22-item version of the Maslach Burnout Inventory was used to measure exhaustion,                                                                                                                                                                                                                                                                                                                        | 1 | Full MBI        | 1 | 0 | 1 | 0 | 0 | 1 | 0 | 3 |

|             |                                                                                                                                                                                                                                                                                                                                                                                                                                               |   |                 |   |   |   |   |   |   |   |   |
|-------------|-----------------------------------------------------------------------------------------------------------------------------------------------------------------------------------------------------------------------------------------------------------------------------------------------------------------------------------------------------------------------------------------------------------------------------------------------|---|-----------------|---|---|---|---|---|---|---|---|
|             | depersonalisation, and personal accomplishment. Participants were categorised into 'high/low/moderate' for each subscale and allocated an overall score on burnout as 'high' or 'low'.                                                                                                                                                                                                                                                        |   |                 |   |   |   |   |   |   |   |   |
| Klein 2010  | Copenhagen Burnout Inventory                                                                                                                                                                                                                                                                                                                                                                                                                  | 0 | Copenhagen      | 1 | 1 | 0 | 0 | 1 | 1 | 0 | 4 |
| Koleck 2000 | The French translation of the 22-item Maslach Burnout Inventory was used. Unclear how closely this maps onto the original MBI as factor analysis was conducted to produce three factors of emotional exhaustion, personal accomplishment and distance towards others.                                                                                                                                                                         | 1 | Full MBI        | 0 | 0 | 0 | 0 | 0 | 1 | 0 | 1 |
| Kriss 2021  | Single item from the MBI-EE                                                                                                                                                                                                                                                                                                                                                                                                                   | 1 | MBI Abbreviated | 1 | 0 | 0 | 0 | 1 | 1 | 0 | 3 |
| Kuerer 2007 | Burnout was measured using the 22-item Maslach burnout inventory, which captured all three domains of burnout. Participants were categorised as 'low', 'moderate' or 'high' for each of the subscale scores and were assigned an overall low/high burnout categorisation based on whether they were high on either/both exhaustion and depersonalisation subscales. Symptoms of depression were measured using the Primary Care Evaluation of | 1 | Full MBI        | 1 | 1 | 0 | 0 | 1 | 1 | 1 | 5 |

|              |                                                                                                                                                                                                                                                                                                                      |   |          |   |   |   |   |   |   |   |   |
|--------------|----------------------------------------------------------------------------------------------------------------------------------------------------------------------------------------------------------------------------------------------------------------------------------------------------------------------|---|----------|---|---|---|---|---|---|---|---|
|              | Mental Disorders a two-item standardized depression-screening tool. Mental and physical Quality of Life was measured using the Medical Outcomes Study Short Form.                                                                                                                                                    |   |          |   |   |   |   |   |   |   |   |
| Kuhn 2009    | The 22-item Maslach Burnout Inventory was used to measure all 3 domains of burnout. Participants were categorised as low, moderate, or high on each subscale. "Career burnout" was created as a dichotomous yes/no variables based on whether respondents scored in the highest category for any of the 3 subscales. | 1 | Full MBI | 1 | 0 | 0 | 0 | 1 | 1 | 0 | 3 |
| Kumar 2007   | The 22-item Maslach Burnout Inventory was used to measure all 3 domains of burnout. Participants were categorised as low, moderate or high on each subscale.                                                                                                                                                         | 1 | Full MBI | 1 | 0 | 0 | 0 | 0 | 1 | 1 | 3 |
| Gupta 2018   | Self-reported burnout using a single item from the widely used Mini Z Burnout Survey which is validated against MBI                                                                                                                                                                                                  | 1 | Other    | 0 | 1 | 0 | 0 | 0 | 1 | 1 | 3 |
| Kushnir 2006 | Burnout was measured using a scale by Kushnir and Melamed. This measure views burnout as comprising of emotional exhaustion, physical fatigue, and cognitive weariness. It includes four parts: emotional and                                                                                                        | 0 | Other    | 0 | 0 | 0 | 0 | 0 | 1 | 0 | 1 |

|                 |                                                                                                                                                                                                                                                                                                                                                                         |   |                 |   |   |   |   |   |   |   |   |
|-----------------|-------------------------------------------------------------------------------------------------------------------------------------------------------------------------------------------------------------------------------------------------------------------------------------------------------------------------------------------------------------------------|---|-----------------|---|---|---|---|---|---|---|---|
|                 | physical exhaustion, listlessness, tension, and cognitive weariness. The measure used was the total of the points in all four sub-scales divided by the total number of items.                                                                                                                                                                                          |   |                 |   |   |   |   |   |   |   |   |
| Kushnir 2014    | The 22-item Maslach Burnout Inventory was used to measure all 3 domains of burnout. Participants were categorised as low, moderate or high on each subscale. Participants were also given an overall burnout score based on the average of the responses to the EE and DE scales and these two subscales were used to give an overall categorisation as 'high burnout'. | 1 | Full MBI        | 1 | 0 | 1 | 0 | 0 | 1 | 0 | 3 |
| Kwah 2017       | 22-item Maslach Burnout Inventory                                                                                                                                                                                                                                                                                                                                       | 1 | MBI Abbreviated | 1 | 0 | 1 | 0 | 0 | 1 | 0 | 3 |
| Lafreniere 2016 | Maslach burnout inventory (EE and DP components), 4 screening tests for depression and anxiety                                                                                                                                                                                                                                                                          | 1 | MBI Abbreviated | 1 | 1 | 1 | 0 | 1 | 1 | 1 | 6 |
| Lall 2020       | Not MBI, adapted questionnaire used                                                                                                                                                                                                                                                                                                                                     | 0 | Other           | 1 | 1 | 1 | 0 | 1 | 1 | 1 | 6 |
| Lavanchy 2004   | Maslach Burnout Inventory used to measure burnout; Beck Depression Inventory used to measure depression                                                                                                                                                                                                                                                                 | 1 | MBI Abbreviated | 1 | 0 | 1 | 0 | 1 | 1 | 0 | 4 |
| Lemkau 1994     | 25-item Maslach Burnout Inventory was used to measure all three dimensions of burnout. Participants were categorized into 'low',                                                                                                                                                                                                                                        | 1 | Full MBI        | 1 | 0 | 1 | 0 | 0 | 1 | 0 | 3 |

|                        |                                                                                                                                                                                                                                                                  |   |                 |   |   |   |   |   |   |   |   |
|------------------------|------------------------------------------------------------------------------------------------------------------------------------------------------------------------------------------------------------------------------------------------------------------|---|-----------------|---|---|---|---|---|---|---|---|
|                        | 'moderate' and 'high' for each subscale.                                                                                                                                                                                                                         |   |                 |   |   |   |   |   |   |   |   |
| Leung 2014             | The 22-item Maslach Burnout Inventory was used to measure all 3 domains of burnout. Participants were categorised as low, moderate and high on each subscale.                                                                                                    | 1 | Full MBI        | 1 | 0 | 1 | 0 | 0 | 1 | 0 | 3 |
| Levin 2017             | The 22-item Maslach Burnout Inventory was used to measure all 3 domains of burnout. Participants were categorised as low, moderate, and high on each subscale. High scores on either EE or DP were indicative of burnout. Overall quality of life also measured. | 1 | Full MBI        | 1 | 0 | 0 | 0 | 1 | 1 | 1 | 4 |
| Li 2018                | Chinese version of the 22-item Maslach Burnout Inventory-Human Service Survey. Participants were categorised as low, moderate, and high on each subscale. High scores on either EE or DP were indicative of burnout.                                             | 1 | Full MBI        | 1 | 1 | 1 | 0 | 0 | 1 | 1 | 5 |
| Linzer 2009            | Physician burnout (Rohland et al. 2004); Physician job stress scale                                                                                                                                                                                              | 0 | Other           | 1 | 0 | 0 | 0 | 1 | 1 | 0 | 3 |
| Linzer 2017            | Single item Burnout measure from Physician Work life study                                                                                                                                                                                                       | 0 | Other           | 1 | 0 | 0 | 0 | 1 | 1 | 1 | 4 |
| Loerbroks 2017         | 6-item version of the MBI measuring emotional exhaustion and depersonalisation                                                                                                                                                                                   | 1 | MBI Abbreviated | 1 | 1 | 1 | 0 | 1 | 1 | 0 | 5 |
| Lu 2015                | Maslach Burnout Inventory                                                                                                                                                                                                                                        | 1 | MBI Abbreviated | 0 | 0 | 0 | 0 | 0 | 1 | 0 | 1 |
| Makara-Studzinska 2020 | Link Burnout Questionnaire (LBQ) was                                                                                                                                                                                                                             | 0 | MBI Abbreviated | 1 | 0 | 0 | 0 | 1 | 1 | 1 | 4 |

|                |                                                                                                                                                                                                                                                                                                                                                                                                                                                                                                                                                                                                                                                                                                                                                                        |   |       |   |   |   |   |   |   |   |   |
|----------------|------------------------------------------------------------------------------------------------------------------------------------------------------------------------------------------------------------------------------------------------------------------------------------------------------------------------------------------------------------------------------------------------------------------------------------------------------------------------------------------------------------------------------------------------------------------------------------------------------------------------------------------------------------------------------------------------------------------------------------------------------------------------|---|-------|---|---|---|---|---|---|---|---|
|                | <p>used to measure the variable of burnout, and the Perceived Stress Scale (PSS-10) was used to measure the variable describing the current stress level. The LBQ questionnaire is an adaptation of a 24-item tool by Massimo Santinello, developed by Jaworowska [41]. The examined person uses a 6-point scale to assess feelings related to their professional work. Each item is scored on a 6-point Likert scale ranging from 1 (never) – 6 (very often)</p> <p>The tool examines four domains: psychophysical exhaustion (Exhaustion-Energy), involvement in relationships with patients (Lack of Commitment – Commitment), effectiveness in performed work (Lack of Efficacy – Effectiveness) and existential expectations (Disappointment – Satisfaction).</p> |   |       |   |   |   |   |   |   |   |   |
| Marchalik 2019 | <p>Burnout measured through the validated two single-item measures of the Maslach Burnout Inventory (MBI). Burnout was assessed as a binary variable with those reporting 'once a week' or 'more', on either the emotional exhaustion or depersonalisation domains considered 'burnt-out'. Quality of life</p>                                                                                                                                                                                                                                                                                                                                                                                                                                                         | 1 | Other | 1 | 0 | 0 | 0 | 0 | 1 | 1 | 3 |



|                     |                                                                                                                                                                                 |   |                 |   |   |   |   |   |   |   |   |
|---------------------|---------------------------------------------------------------------------------------------------------------------------------------------------------------------------------|---|-----------------|---|---|---|---|---|---|---|---|
|                     | (QoL) was also measured via linear analogue self-assessment                                                                                                                     |   |                 |   |   |   |   |   |   |   |   |
| McAbee 2015         | 22-item Maslach burnout inventory.                                                                                                                                              | 1 | Full MBI        | 1 | 0 | 0 | 0 | 1 | 1 | 1 | 4 |
| McNearney 2008      | Burnout measured via two items derived from the MBI: "" "I feel emotionally drained by my work," and "I feel I am positively influencing other peoples' lives through my work." | 1 | Other           | 1 | 1 | 0 | 0 | 1 | 1 | 1 | 5 |
| Mehta 2019          | Emotional exhaustion component of burnout measured via a single item                                                                                                            | 0 | MBI Abbreviated | 0 | 0 | 0 | 0 | 1 | 1 | 1 | 3 |
| Messerotti 2020     | Maslach burnout inventory 22 items                                                                                                                                              | 1 | Full MBI        | 0 | 1 | 1 | 0 | 0 | 1 | 1 | 4 |
| Mohammed 2018       | 22-item MBI used to measure all three subscales of burnout. Burnout defined as high scores on the EE and DP combined with low scores on PA.                                     | 1 | Full MBI        | 1 | 1 | 1 | 0 | 0 | 1 | 1 | 5 |
| Moreno-Jimenez 2012 | Physician Burnout Questionnaire (PBQ) (Moreno-Jiménez, et al., 2006)                                                                                                            | 0 | Other           | 1 | 1 | 0 | 0 | 0 | 1 | 1 | 4 |
| Nguyen 2021         | Adapted version of the MBI                                                                                                                                                      | 1 | MBI Abbreviated | 1 | 0 | 0 | 0 | 0 | 1 | 1 | 3 |
| Nwosu 2020          | Oldenburg burnout inventory                                                                                                                                                     | 0 | Other           | 1 | 1 | 1 | 1 | 1 | 1 | 1 | 7 |
| Ochoa 2018          | Spanish adaptation of the Maslach Burnout Inventory (MBI) developed by Bresó et al. (2007)                                                                                      | 0 | MBI Abbreviated | 0 | 0 | 0 | 0 | 0 | 0 | 0 | 0 |
| O'Connor 2017       | Maslach burnout inventory                                                                                                                                                       | 1 | MBI Abbreviated | 1 | 1 | 1 | 0 | 1 | 1 | 1 | 6 |
| O'Connor 2019       | Two questions from the Maslach Burnout Inventory: 1 "How often do you feel burned out from work?" (Emotional exhaustion) and "How                                               | 0 | Other           | 1 | 1 | 1 | 0 | 1 | 1 | 1 | 6 |

|                    |                                                                                                                            |   |                 |   |   |   |   |   |   |   |   |
|--------------------|----------------------------------------------------------------------------------------------------------------------------|---|-----------------|---|---|---|---|---|---|---|---|
|                    | often do you feel you've become more callous toward people since you took this job?" (depersonalization)                   |   |                 |   |   |   |   |   |   |   |   |
| Opoku 2014         | the 9-item Abbreviated Maslach's Burnout Inventory in its entirety                                                         | 1 | MBI Abbreviated | 1 | 1 | 0 | 0 | 1 | 1 | 1 | 5 |
| Ozvacic Adzic 2012 | Maslach Burnout Inventory                                                                                                  | 1 | MBI Abbreviated | 1 | 1 | 0 | 0 | 1 | 1 | 1 | 5 |
| Ozyurt 2006        | Turkish version of the Maslach Burnout Inventory (MBI).                                                                    | 1 | MBI Abbreviated | 1 | 1 | 1 | 0 | 1 | 1 | 1 | 6 |
| Pantenburg 2016    | German version of the Maslach Burnout Inventory - Human Services Survey (MBI)                                              | 1 | MBI Abbreviated | 1 | 1 | 0 | 0 | 1 | 1 | 1 | 5 |
| Park 2016          | Maslach burnout inventory                                                                                                  | 1 | Full MBI        | 1 | 1 | 0 | 0 | 1 | 1 | 1 | 5 |
| Passalacqua 2012   | Maslach Burnout Inventory; Perceived Stress Scale                                                                          | 1 | MBI Abbreviated | 1 | 1 | 0 | 0 | 0 | 1 | 1 | 4 |
| Pedersen 2016      | anxiety caused by uncertainty, concern about bad outcomes, Maslach burnout inventory                                       | 1 | MBI Abbreviated | 1 | 1 | 1 | 0 | 1 | 1 | 1 | 6 |
| Pei 2020           | The Chinese version of the 15-item Maslach Burnout Service Inventory (MBI-GS) with 1 of the 5 "cynicism" questions deleted | 1 | MBI Abbreviated | 1 | 0 | 0 | 0 | 1 | 1 | 1 | 4 |
| Pit 2014, 2016     | MBI shortened                                                                                                              | 1 | MBI Abbreviated | 1 | 1 | 0 | 0 | 1 | 1 | 1 | 5 |
| Prins 2009         | Utrecht Burn-Out Scale (UBOS-C/Maslach Burnout Inventory for Health and Social Services)                                   | 1 | Other           | 1 | 1 | 0 | 0 | 1 | 1 | 1 | 5 |
| Prudenzi 2021      | Shirom melamed burnout measure and GHQ12                                                                                   | 0 | Other           | 0 | 1 | 0 | 0 | 0 | 1 | 1 | 3 |
| Pu 2017            | Maslach Burnout Inventory (MBI) to measure burnout                                                                         | 1 | MBI Abbreviated | 1 | 1 | 0 | 0 | 1 | 1 | 1 | 5 |

|                   |                                                                                                                                                                                                 |   |                 |   |   |   |   |   |   |   |   |
|-------------------|-------------------------------------------------------------------------------------------------------------------------------------------------------------------------------------------------|---|-----------------|---|---|---|---|---|---|---|---|
|                   | (Maslach, Jackson, & Leiter, 1986)                                                                                                                                                              |   |                 |   |   |   |   |   |   |   |   |
| Qureshi 2015      | Maslach Burnout Inventory                                                                                                                                                                       | 1 | MBI Abbreviated | 1 | 1 | 0 | 0 | 1 | 1 | 1 | 5 |
| Rabatin 2016      | Single question that correlates with the Maslach Burnout Inventory emotional exhaustion scale taken from the MEMO (Minimizing Error, Maximizing outcome)                                        | 1 | Other           | 0 | 1 | 0 | 0 | 1 | 1 | 1 | 4 |
| Rafferty 1986     | The Maslach Burnout Inventory (MBI)                                                                                                                                                             | 0 | Full MBI        | 1 | 0 | 0 | 0 | 1 | 1 | 1 | 4 |
| Rao 2020          | MBI-GS % & Mass Survey 2017 scales: he 2017 four domains (1) career and compensation satisfaction; (2) well-being; (3) administrative workload; and (4) leadership and diversity. <sup>24</sup> | 1 | MBI Abbreviated | 1 | 1 | 1 | 0 | 1 | 1 | 1 | 6 |
| Ratanawongsa 2008 | six-item scale previously derived from the Maslach Burnout Inventory (MBI)                                                                                                                      | 1 | MBI Abbreviated | 0 | 0 | 0 | 0 | 1 | 1 | 1 | 3 |
| Rath 2015         | MBI & Medical Outcomes Study Short Form (Sf-12) for physical and mental and QoL & Depression screened using 2-item PRIME MD/PHQ2 & Alcohol abuse was evaluated using the CAGE                   | 1 | MBI Abbreviated | 0 | 1 | 0 | 0 | 0 | 1 | 1 | 3 |
| Ripp 2010a        | Maslach Burnout Inventory                                                                                                                                                                       | 1 | Full MBI        | 1 | 1 | 0 | 1 | 0 | 0 | 1 | 4 |
| Roy 2017          | Global satisfaction scale of Lichtenstein; turnover intention (using the scale described by Houkes et al. & burnout (using the inventory of West et al.                                         | 0 | Other           | 1 | 1 | 1 | 0 | 1 | 1 | 1 | 6 |
| Ruggieri 2014     | Job Satisfaction Scale (JSS) and the Link Burnout Questionnaire (LBQ).                                                                                                                          | 0 | Other           | 0 | 0 | 0 | 0 | 0 | 1 | 0 | 1 |

|                |                                                                                                                                                                                                                                                                                          |   |                 |   |   |   |   |   |   |   |   |
|----------------|------------------------------------------------------------------------------------------------------------------------------------------------------------------------------------------------------------------------------------------------------------------------------------------|---|-----------------|---|---|---|---|---|---|---|---|
| Sahin 2019     | Minnesota Satisfaction-IWS \ & MBI & Beck Depression Score & ach Personal Accomplishment Score (MPAS). Results: Mean ( $\pm$ SD) Total work satisfaction score w                                                                                                                         | 1 | MBI Abbreviated | 1 | 1 | 1 | 0 | 1 | 1 | 1 | 6 |
| Salles 2019    | Social belonging (a 10-item scale adapted from previous studies), well-being (the Dupuy Psychological General Well-Being Scale, Beck Depression Inventory Short Form, and Maslach Burnout Inventory), and risk of attrition (indicated by frequency of thoughts of leaving the program). | 1 | MBI Abbreviated | 0 | 0 | 1 | 0 | 1 | 1 | 1 | 4 |
| Schaufeli 2009 | Workaholism - 10-item DUWAS (Dutch Workaholism Scale; Schaufeli et al.; & Work demands via 3 scales & Role Conflict & Burnout via Dutch version of MBI-HSS & Perceived Happiness/Health/Well-being via scales                                                                            | 1 | Other           | 1 | 1 | 0 | 0 | 0 | 1 | 1 | 4 |
| Shanafelt 2002 | Maslach Burnout Inventory                                                                                                                                                                                                                                                                | 1 | Full MBI        | 1 | 1 | 1 | 0 | 1 | 1 | 1 | 6 |
| Shanafelt 2009 | MBI-22 & satisfaction survey - effort % to work and what was meaningful via survey                                                                                                                                                                                                       | 1 | Full MBI        | 1 | 1 | 0 | 0 | 1 | 1 | 1 | 5 |
| Shanafelt 2010 | Maslach Burnout Inventory                                                                                                                                                                                                                                                                | 1 | Full MBI        | 1 | 1 | 0 | 0 | 1 | 1 | 1 | 5 |
| Shanafelt 2014 | MBI-22 & satisfaction survey                                                                                                                                                                                                                                                             | 1 | Full MBI        | 1 | 1 | 0 | 0 | 1 | 1 | 1 | 5 |
| Sinsky 2017    | Full 22-item MBI                                                                                                                                                                                                                                                                         | 1 | Full MBI        | 1 | 1 | 0 | 0 | 1 | 1 | 1 | 5 |
| Siu 2012       | Full 22-item MBI                                                                                                                                                                                                                                                                         | 1 | Full MBI        | 1 | 0 | 0 | 0 | 1 | 1 | 1 | 4 |
| Sliwa 2019     | Mini-Z Burnout Survey                                                                                                                                                                                                                                                                    | 0 | Other           | 1 | 1 | 0 | 0 | 0 | 1 | 1 | 4 |
| Soler 2008     | Full 22-item MBI                                                                                                                                                                                                                                                                         | 1 | Full MBI        | 1 | 1 | 0 | 0 | 1 | 1 | 1 | 5 |

|                       |                                                                                                                                                                                                                                                                           |   |                 |   |   |   |   |   |   |   |   |
|-----------------------|---------------------------------------------------------------------------------------------------------------------------------------------------------------------------------------------------------------------------------------------------------------------------|---|-----------------|---|---|---|---|---|---|---|---|
| Sonmez 2021           | Maslach burnout inventory, state trait anxiety inventory                                                                                                                                                                                                                  | 1 | MBI Abbreviated | 1 | 0 | 0 | 0 | 1 | 1 | 0 | 3 |
| Stafford 2010         | Full 22-item MBI; GHQ (12-item); AUDIT                                                                                                                                                                                                                                    | 1 | Full MBI        | 1 | 0 | 0 | 0 | 0 | 1 | 0 | 2 |
| Sulaiman 2017         | Full 22-item MBI                                                                                                                                                                                                                                                          | 1 | Full MBI        | 1 | 1 | 1 | 0 | 0 | 1 | 0 | 4 |
| Sun 2017              | Full 22-item MBI                                                                                                                                                                                                                                                          | 1 | Full MBI        | 1 | 1 | 0 | 0 | 0 | 0 | 1 | 3 |
| Sun 2021              | single item, no validated measures included professional reputation, perceived stress, burnout, withdrawal behaviour (defensive- medicine”, “turnover intention”, and “participants’ attitudes toward the idea of their offspring becoming a physician) reputation damage | 1 | Other           | 0 | 1 | 0 | 0 | 0 | 0 | 1 | 2 |
| Surgenor 2009         | Full 22-item MBI                                                                                                                                                                                                                                                          | 1 | Full MBI        | 1 | 1 | 0 | 0 | 0 | 1 | 1 | 4 |
| Tak 2017              | 2-item MBI                                                                                                                                                                                                                                                                | 1 | Other           | 1 | 1 | 1 | 0 | 1 | 1 | 1 | 6 |
| Tawfik 2018           | Full 22-item MBI                                                                                                                                                                                                                                                          | 1 | Full MBI        | 1 | 1 | 1 | 0 | 1 | 1 | 1 | 6 |
| Taycan 2012           | Full 22-item MBI; GHQ (12-item); Beck Depression Inventory (21-item); Pro-QOL)                                                                                                                                                                                            | 1 | Full MBI        | 1 | 0 | 0 | 0 | 1 | 1 | 1 | 4 |
| Tian 2019             | Full 22-item MB                                                                                                                                                                                                                                                           | 1 | Full MBI        | 0 | 1 | 0 | 0 | 1 | 1 | 1 | 4 |
| Tokuda 2009           | Full MBI; GHQ-12; Hospital Physicians Satisfaction Scale)                                                                                                                                                                                                                 | 1 | Full MBI        | 1 | 0 | 0 | 0 | 1 | 1 | 1 | 4 |
| Toral-Villanueva 2009 | Maslach Burnout Inventory                                                                                                                                                                                                                                                 | 1 | Full MBI        | 1 | 1 | 1 | 0 | 1 | 1 | 1 | 6 |
| Torppa 2015           | Full 22-item MBI                                                                                                                                                                                                                                                          | 1 | Full MBI        | 0 | 1 | 1 | 0 | 1 | 1 | 1 | 5 |
| Torres 2015           | Maslach Burnout Inventory                                                                                                                                                                                                                                                 | 1 | Full MBI        | 0 | 0 | 1 | 1 | 1 | 1 | 1 | 5 |
| Trockel 2018          | Full 22-item MBI; Abbreviated 2-item MBI; Self-defined single item                                                                                                                                                                                                        | 1 | Full MBI        | 0 | 1 | 0 | 0 | 0 | 1 | 1 | 3 |
| Umene-Nakano 2013     | full 22-item MBI; Work-life balance satisfaction - 1 item                                                                                                                                                                                                                 | 1 | Full MBI        | 1 | 1 | 1 | 1 | 1 | 1 | 1 | 7 |
| Vanhaecht 2019        | One symptom/item for stress as part of an 11-item questionnaire                                                                                                                                                                                                           | 0 | MBI Abbreviated | 1 | 1 | 0 | 1 | 0 | 1 | 1 | 5 |

|                        |                                                                                     |   |                 |   |   |   |   |   |   |   |   |
|------------------------|-------------------------------------------------------------------------------------|---|-----------------|---|---|---|---|---|---|---|---|
|                        | developed based on the literature                                                   |   |                 |   |   |   |   |   |   |   |   |
| vanWulfftenPalthe 2016 | Global Job Satisfaction instrument, Shirom-Malamed Burnout Measure                  | 0 | Other           | 1 | 1 | 0 | 0 | 1 | 1 | 1 | 5 |
| Visser 2003            | Consultants' Mental Health Questionnaire                                            | 0 | Other           | 1 | 1 | 1 | 1 | 1 | 1 | 1 | 7 |
| Voultzos 2020          | MBI-22; STAI Form Y-1-20                                                            | 1 | Full MBI        | 1 | 0 | 1 | 1 | 1 | 1 | 1 | 6 |
| Walocha 2013           | Maslach burnout inventory                                                           | 1 | Full MBI        | 0 | 0 | 0 | 0 | 0 | 1 | 1 | 2 |
| Ward 2020              | MBI 2-item; Mini-Z survey                                                           | 1 | Other           | 1 | 1 | 1 | 1 | 1 | 1 | 1 | 7 |
| Watson 2018            | Full 22-item MBI                                                                    | 1 | Full MBI        | 0 | 0 | 0 | 1 | 1 | 1 | 1 | 4 |
| Weigl 2015             | Maslach Burnout Inventory                                                           | 1 | Full MBI        | 0 | 0 | 1 | 1 | 1 | 1 | 1 | 5 |
| Weigl & Schneider 2017 | German version of the Maslach Burnout Inventory - Human Services Survey (MBI)       | 1 | MBI Abbreviated | 0 | 1 | 1 | 0 | 0 | 1 | 1 | 4 |
| Welle 2020             | Stanford Professional Fulfilment Index; Short Form-12 (SF-12)                       | 1 | Other           | 1 | 1 | 0 | 1 | 1 | 1 | 1 | 6 |
| Welp 2014              | Maslach Burnout Inventory                                                           | 1 | Full MBI        | 1 | 1 | 0 | 1 | 1 | 1 | 1 | 6 |
| Wen 2016               | Maslach burnout inventory                                                           | 1 | Full MBI        | 1 | 1 | 1 | 1 | 1 | 1 | 1 | 7 |
| Weng 2011              | MBI-22 item                                                                         | 1 | Full MBI        | 0 | 0 | 0 | 0 | 1 | 1 | 0 | 2 |
| West 2006              | Maslach Burnout Inventory                                                           | 1 | Full MBI        | 1 | 1 | 1 | 1 | 1 | 1 | 1 | 7 |
| West 2009              | Maslach Burnout Inventory; 2-question approach for depression                       | 1 | Full MBI        | 1 | 1 | 1 | 1 | 1 | 1 | 1 | 7 |
| Whitebird 2017         | A single item from the Minimizing Error, Maximizing Outcomes (MEMO) provider survey | 0 | Other           | 1 | 1 | 0 | 1 | 0 | 1 | 1 | 5 |
| Willard-Grace 2019     | MBI- 10 item                                                                        | 1 | MBI Abbreviated | 1 | 1 | 1 | 1 | 1 | 1 | 1 | 7 |
| Williams 2007          | One item burnout inventory (Bachman & Freeborn, 1999);                              | 0 | Other           | 1 | 0 | 1 | 1 | 1 | 1 | 1 | 6 |
| Williamson 2018        | MBI - 22 item; PRIME-MD PHQ-2; Y/N Do you have depression; positive work-           | 1 | Full MBI        | 0 | 1 | 1 | 1 | 0 | 1 | 1 | 5 |

|             |                                                                                                                                 |   |                 |   |   |   |   |   |   |   |   |
|-------------|---------------------------------------------------------------------------------------------------------------------------------|---|-----------------|---|---|---|---|---|---|---|---|
|             | life balance 2 item (Shanafelt).                                                                                                |   |                 |   |   |   |   |   |   |   |   |
| Wright 2011 | Copenhagen Burnout Inventory (CBI) - 19 item                                                                                    | 0 | Copenhagen      | 0 | 1 | 1 | 0 | 1 | 1 | 1 | 5 |
| Xiao 2014   | Hospital Anxiety and Depression Scale (HADS), Maslach Burnout Inventory-General Survey and Minnesota Satisfaction Questionnaire | 1 | MBI Abbreviated | 0 | 1 | 1 | 0 | 0 | 1 | 1 | 4 |
| Yost 2014   | MBI-22 item                                                                                                                     | 1 | Full MBI        | 1 | 1 | 0 | 0 | 1 | 1 | 1 | 5 |
| Zhang 2011  | Chinese Maslach Burnout Inventory (CMBI) - 15 item; Chinese Physicians' Job Satisfaction Questionnaire (CPJSQ) - 62 items       | 1 | MBI Abbreviated | 0 | 1 | 0 | 0 | 0 | 1 | 1 | 3 |
| Zhou 2017   | MBI-22 item; GHQ-12; Consultants' Mental Health Questionnaire                                                                   | 1 | Full MBI        | 0 | 1 | 0 | 1 | 1 | 1 | 1 | 5 |

# Appendix 10: Forest Plots of All Outcomes with Odd Ratio

## Career Choice Regret

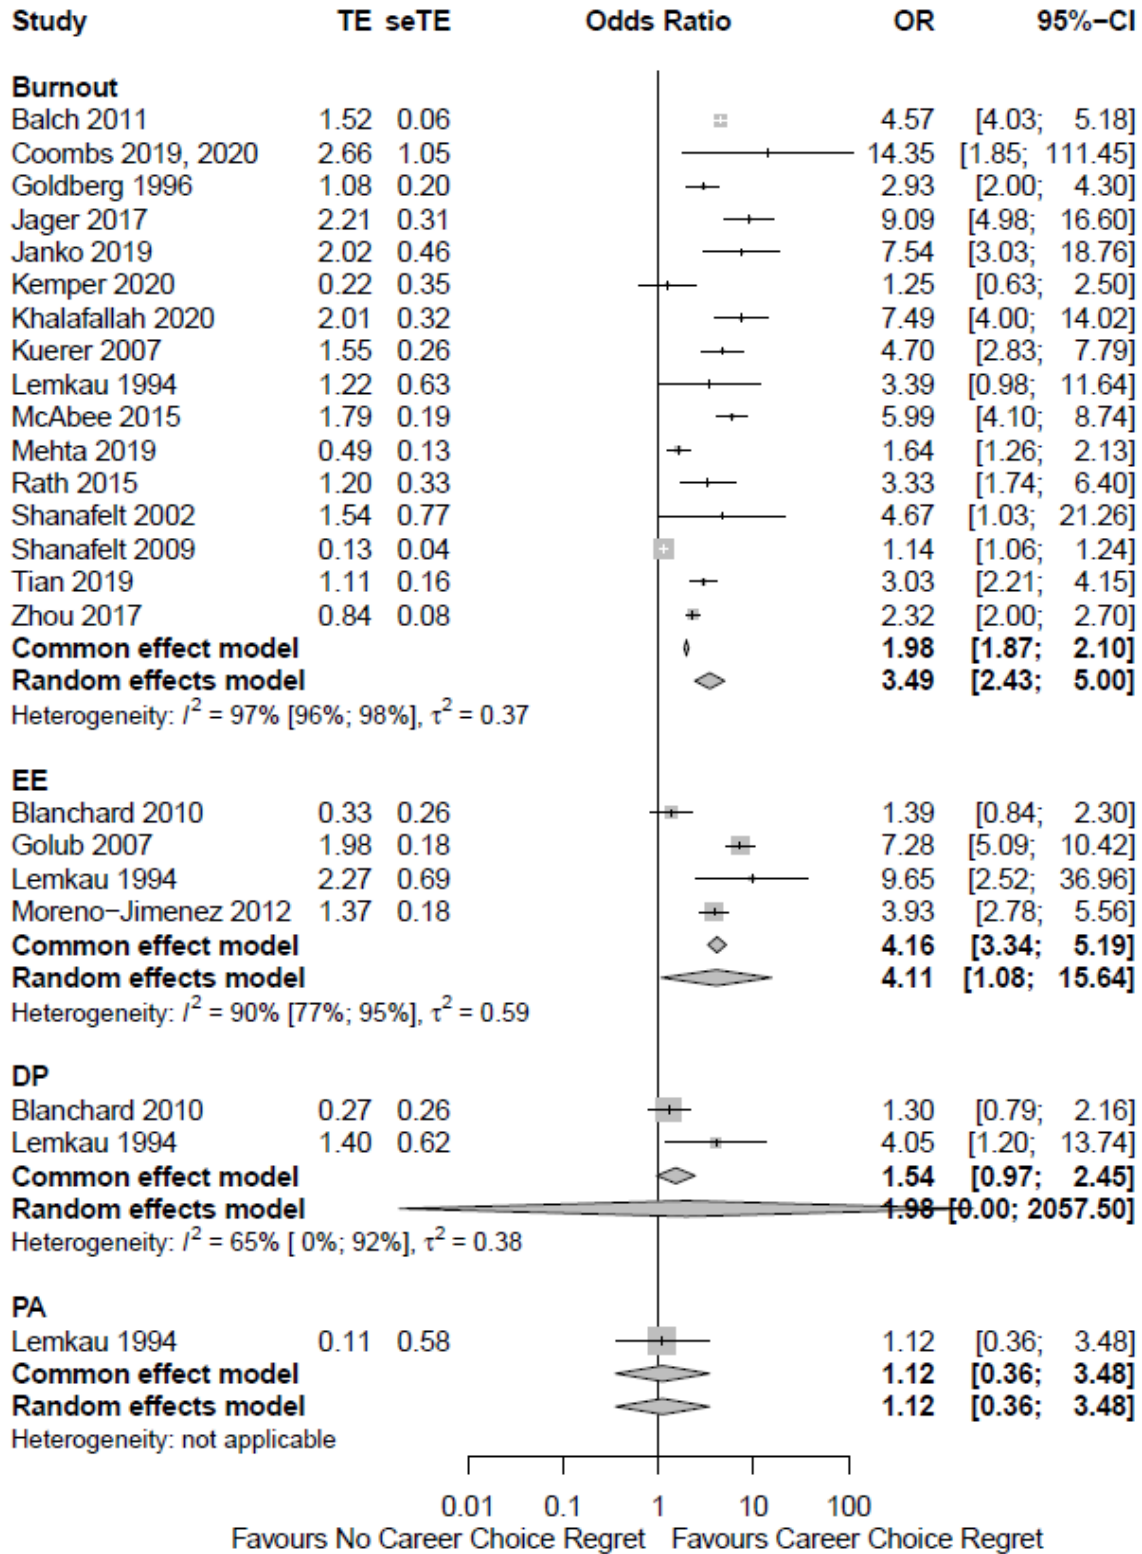

TE: Log odds ratio; seTE: standard error of log odds ratio; OR: odds ratio; CI: confidence interval; EE: emotional exhaustion; DP: depersonalisation; PA: Personal accomplishment.



**Career Development**

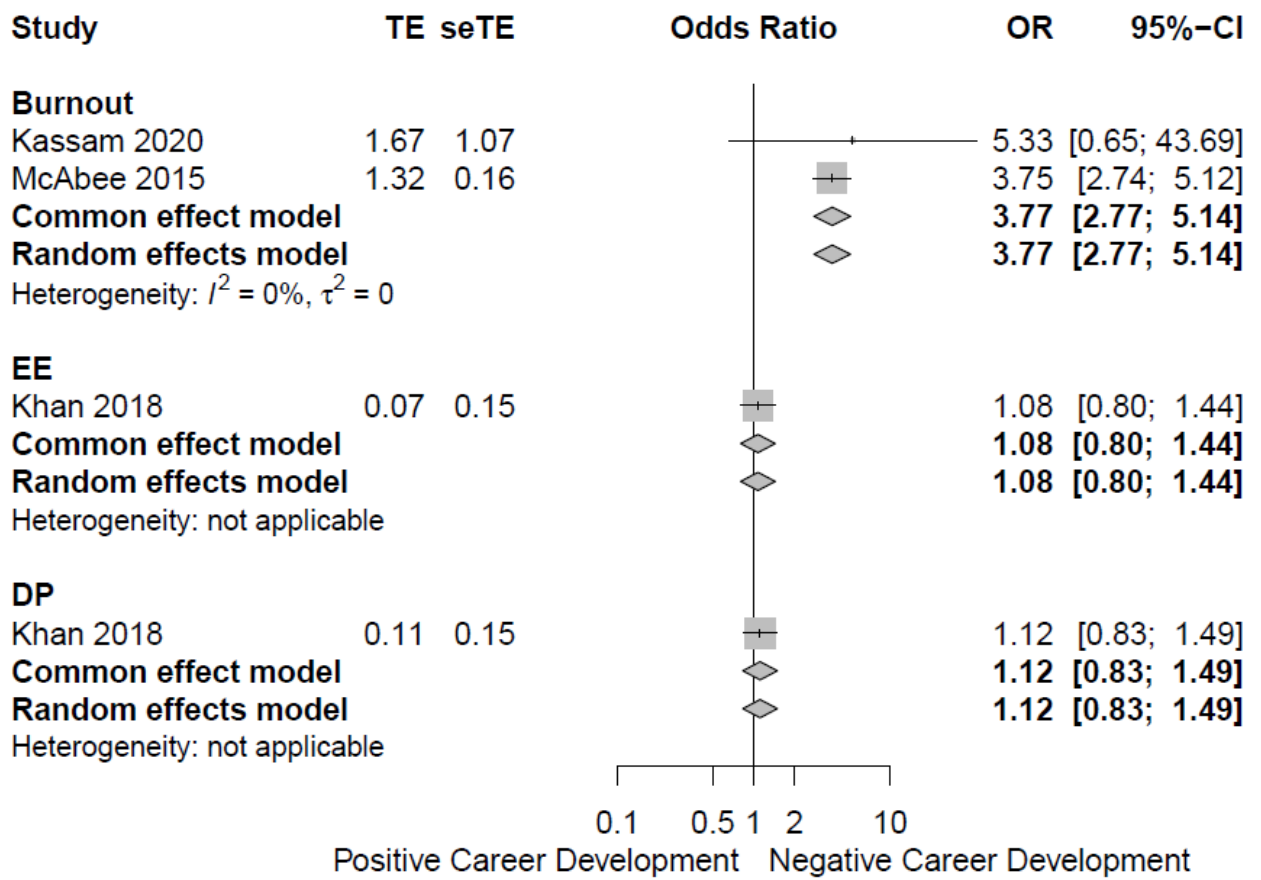

# Job Satisfaction

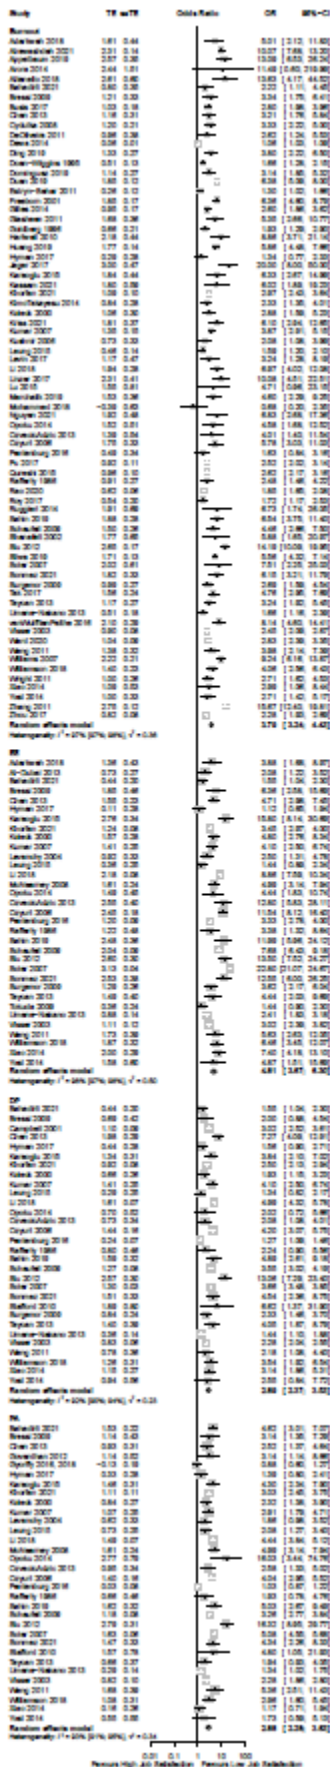

## Patient Satisfaction

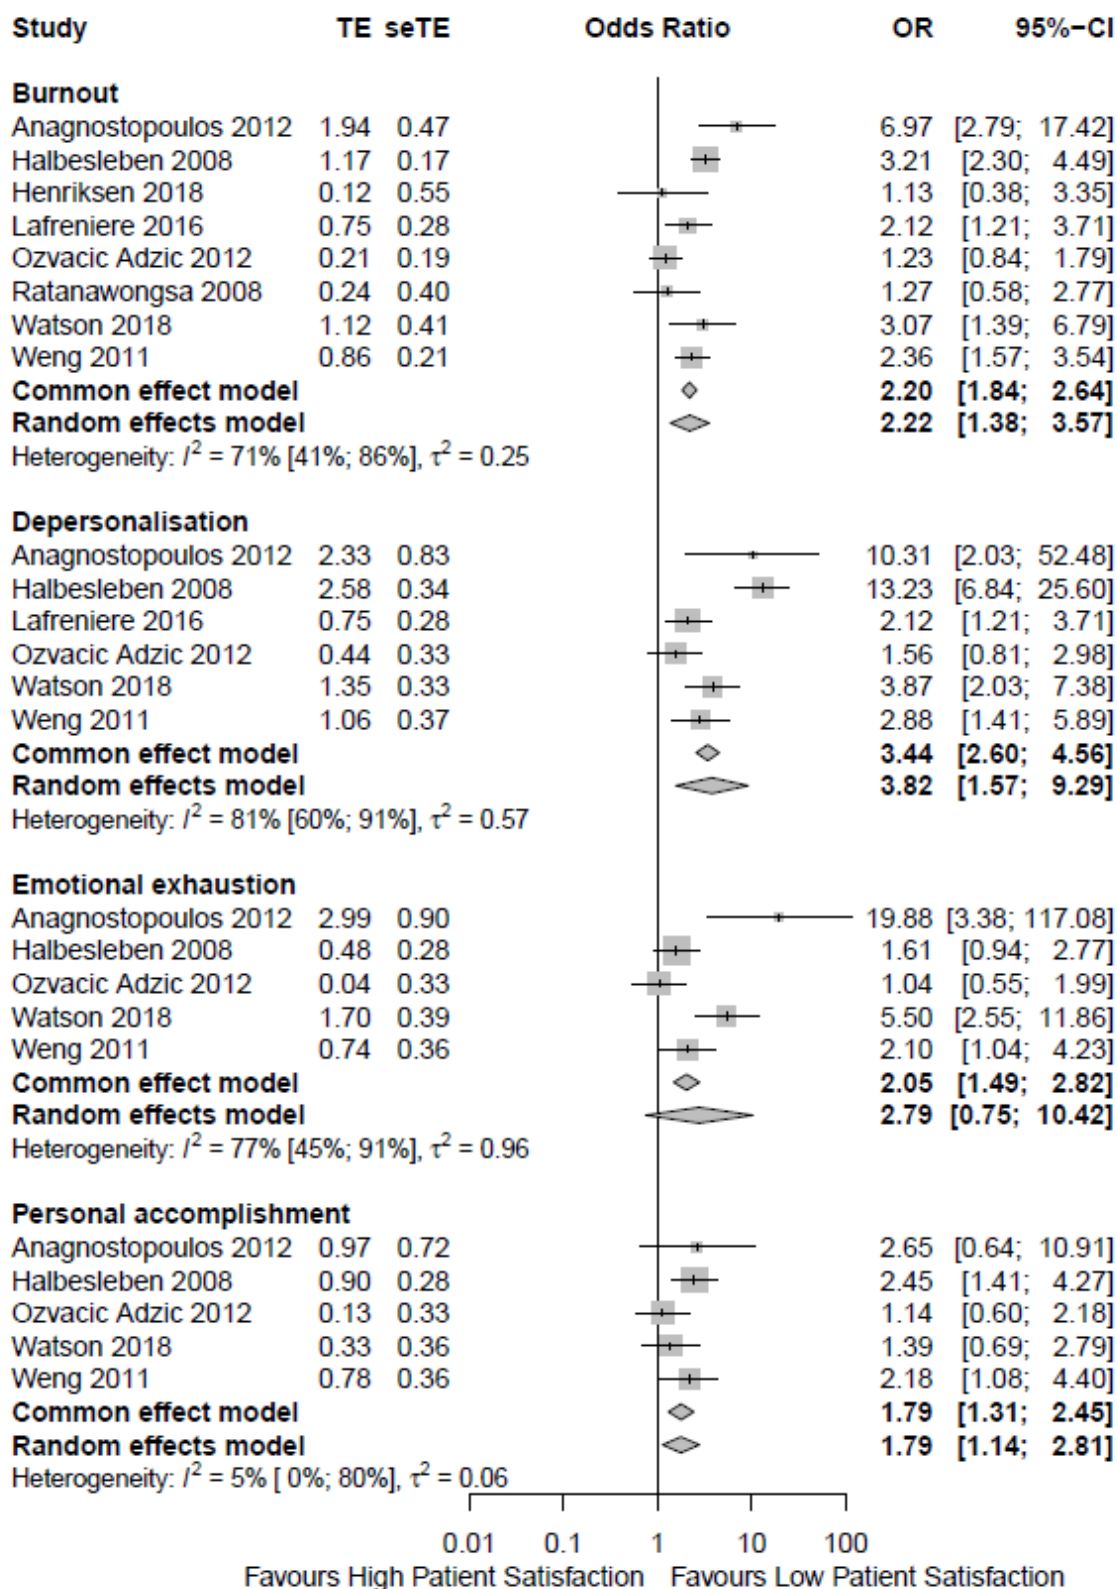

## Productivity

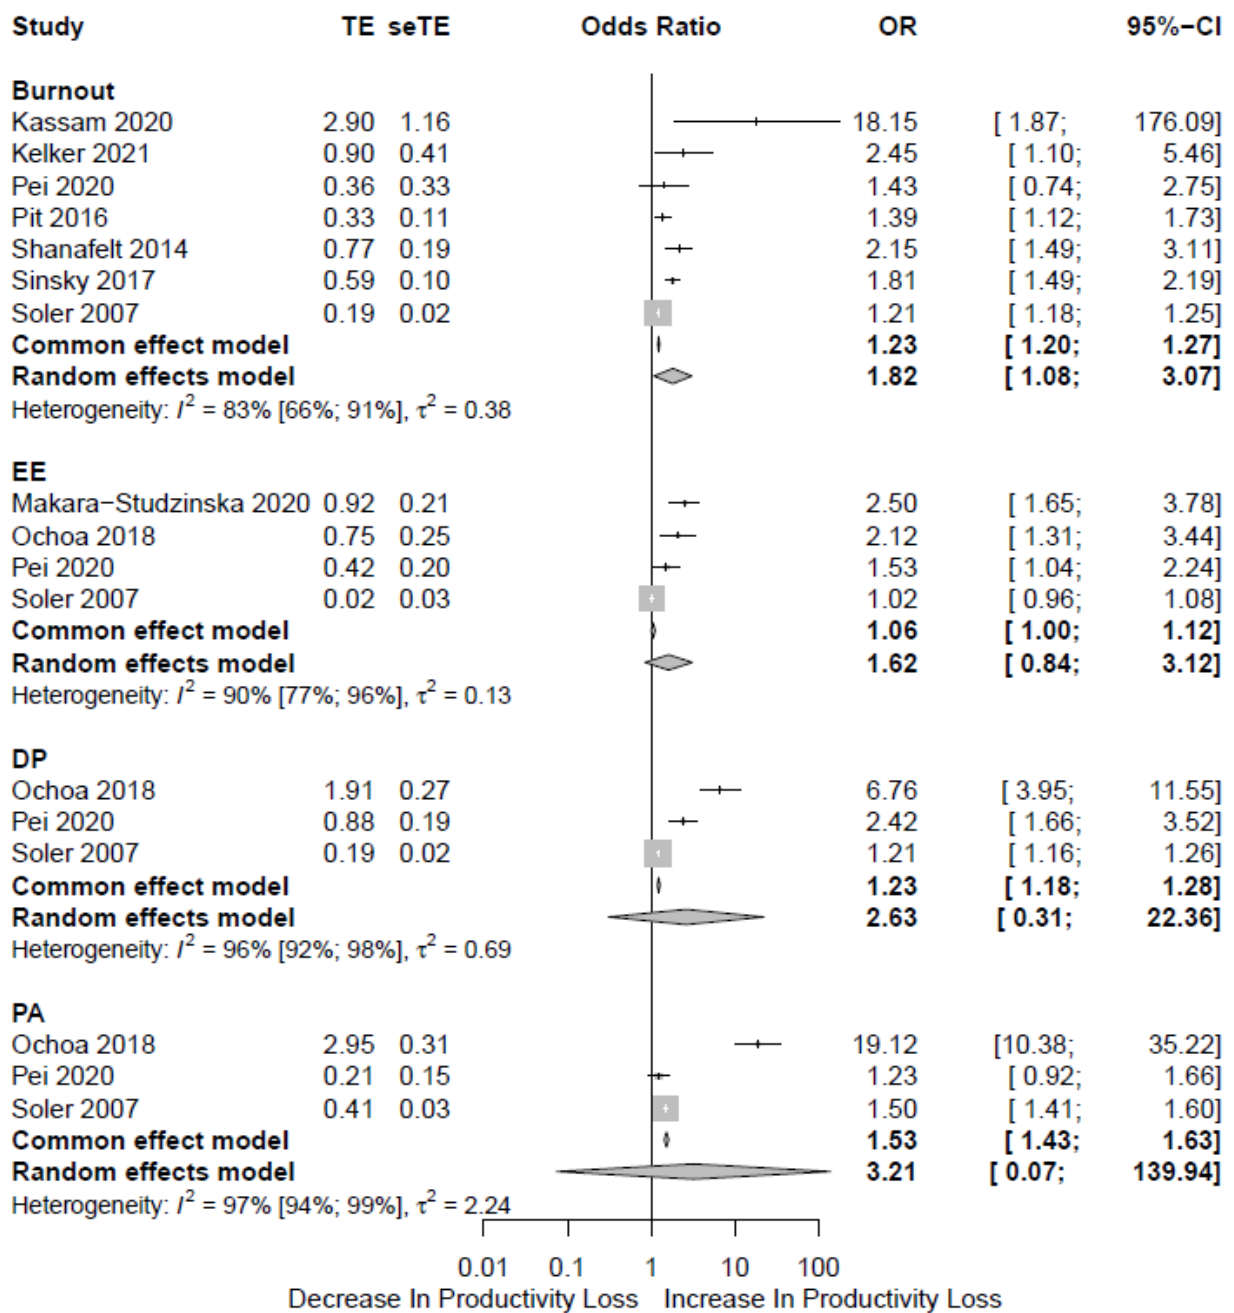

# Professionalism

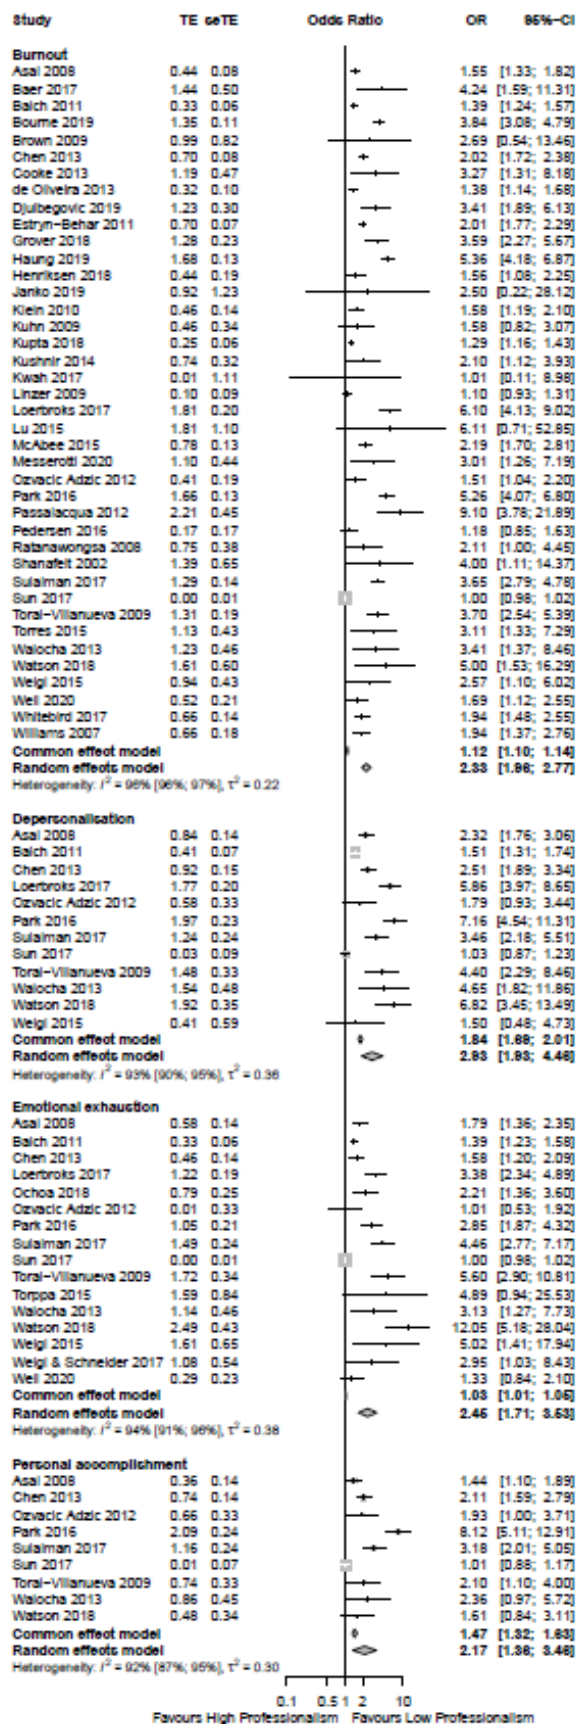

**Sensitivity analysis for professionalism after removing 'Welle 2020' due to their use of the 1-point % change in results.**

|                | <b>K</b> | <b>OR</b> | <b>95% CI</b> | <b>I<sup>2</sup> (95% CI)</b> |
|----------------|----------|-----------|---------------|-------------------------------|
| <b>Burnout</b> | 39       | 2.35      | 1.97 to 2.81  | 96 (96 to 97) %               |
| <b>EE</b>      | 15       | 2.57      | 1.76 to 3.75  | 94 (92 to 96) %               |
| <b>DP</b>      | 12       | 2.93      | 1.93 to 4.46  | 93 (90 to 95) %               |
| <b>PA</b>      | 9        | 2.17      | 1.36 to 3.46  | 92 (87 to 95) %               |

## Appendix 11: Outcomes analysed using SMD

| Burnout & sub-measure                   | No. of studies (No. of physicians) | SMD         | 95% CI [95% PI]                     |
|-----------------------------------------|------------------------------------|-------------|-------------------------------------|
| <b>Career Engagement of Physicians</b>  |                                    |             |                                     |
| <b>Career Choice Regret<sup>‡</sup></b> |                                    |             |                                     |
| Burnout                                 | 16 (33,871)                        | <b>0.69</b> | <b>0.49 to 0.89</b> [-0.06 to 1.43] |
| EE*                                     | 4 (2,014)                          | <b>0.79</b> | <b>0.66 to 0.91</b>                 |
| DP*                                     | 2 (274)                            | 0.24        | -0.02 to 0.49                       |
| PA*                                     | 1 (147)                            | 0.06        | -0.57 to 0.69                       |
| <b>Career Development</b>               |                                    |             |                                     |
| Burnout*                                | 2 (3411)                           | 0.73        | -0.27 to 2.08                       |
| EE*                                     | 1 (593)                            | 0.04        | -0.12 to 0.20                       |
| DP*                                     | 1 (593)                            | 0.06        | -0.10 to 0.22                       |
| PA                                      | No data                            | NA          | NA                                  |
| <b>Job Satisfaction<sup>‡</sup></b>     |                                    |             |                                     |
| Burnout                                 | 73 (146,980)                       | <b>0.73</b> | <b>0.65 to 0.82</b> [0.07 to 1.40]  |
| EE                                      | 33 (22,699)                        | <b>0.87</b> | <b>0.72 to 1.02</b> [0.06 to 1.68]  |
| DP                                      | 30 (22,002)                        | <b>0.59</b> | <b>0.47 to 0.70</b> [0.04 to 1.13]  |
| PA                                      | 32 (27,374)                        | <b>0.58</b> | <b>0.46 to 0.71</b> [-0.09 to 1.25] |
| <b>Productivity Loss</b>                |                                    |             |                                     |
| Burnout                                 | 7 (9,581)                          | <b>0.33</b> | <b>0.04 to 0.62</b>                 |
| EE*                                     | 4 (3,421)                          | 0.03        | 0.00 to 0.06                        |
| DP*                                     | 3 (2,969)                          | <b>0.11</b> | <b>0.09 to 0.14</b>                 |
| PA*                                     | 3 (2,969)                          | <b>0.23</b> | <b>0.20 to 0.27</b>                 |
| <b>Turnover Intention</b>               |                                    |             |                                     |
| Burnout                                 | 25 (32,271)                        | <b>0.62</b> | <b>0.46 to 0.79</b> [-0.19 to 1.44] |
| EE                                      | 16 (23,625)                        | <b>0.57</b> | <b>0.32 to 0.82</b> [-0.43 to 1.57] |
| DP                                      | 11 (23,257)                        | <b>0.33</b> | <b>0.13 to 0.53</b> [-0.35 to 1.01] |
| PA                                      | 5 (11,028)                         | 0.14        | -0.01 to 0.28                       |
| <b>Quality of Patient Care</b>          |                                    |             |                                     |
| <b>Professionalism</b>                  |                                    |             |                                     |
| Burnout                                 | 40 (32,321)                        | <b>0.47</b> | <b>0.37 to 0.56</b> [-0.07 to 1.00] |
| EE                                      | 16 (11,861)                        | <b>0.49</b> | <b>0.29 to 0.69</b> [-0.26 to 1.25] |
| DP                                      | 12 (10,488)                        | <b>0.59</b> | <b>0.36 to 0.82</b> [-0.18 to 1.37] |
| PA                                      | 9 (2,992)                          | <b>0.43</b> | <b>0.17 to 0.68</b>                 |
| <b>Patient Safety Incidents</b>         |                                    |             |                                     |
| Burnout                                 | 35 (41,059)                        | <b>0.39</b> | <b>0.29 to 0.49</b> [-0.19 to 0.97] |
| EE                                      | 17 (20,213)                        | <b>0.42</b> | <b>0.33 to 0.51</b> [0.10 to 0.75]  |
| DP                                      | 14 (19,616)                        | <b>0.49</b> | <b>0.34 to 0.65</b> [-0.04 to 1.03] |
| PA                                      | 14 (19,616)                        | <b>0.21</b> | <b>0.10 to 0.32</b> [-0.14 to 0.56] |
| <b>Patient Satisfaction</b>             |                                    |             |                                     |
| Burnout                                 | 8 (1,002)                          | <b>0.44</b> | <b>0.18 to 0.70</b>                 |
| EE                                      | 5 (527)                            | 0.57        | -0.16 to 1.29                       |
| DP                                      | 6 (571)                            | <b>0.74</b> | <b>0.25 to 1.23</b>                 |

|    |         |             |                     |
|----|---------|-------------|---------------------|
| PA | 5 (527) | <b>0.32</b> | <b>0.07 to 0.57</b> |
|----|---------|-------------|---------------------|

SMD: standardised difference; EE: emotional exhaustion; DP: depersonalisation; PA: personal accomplishment; CI: confidence interval; PI: prediction interval. \*Analysed with fixed effects due to the varied sample sizes involved and with the being less than 5 studies.

See forest plots below for each outcome pooling with SMD.



## Career Choice Regret

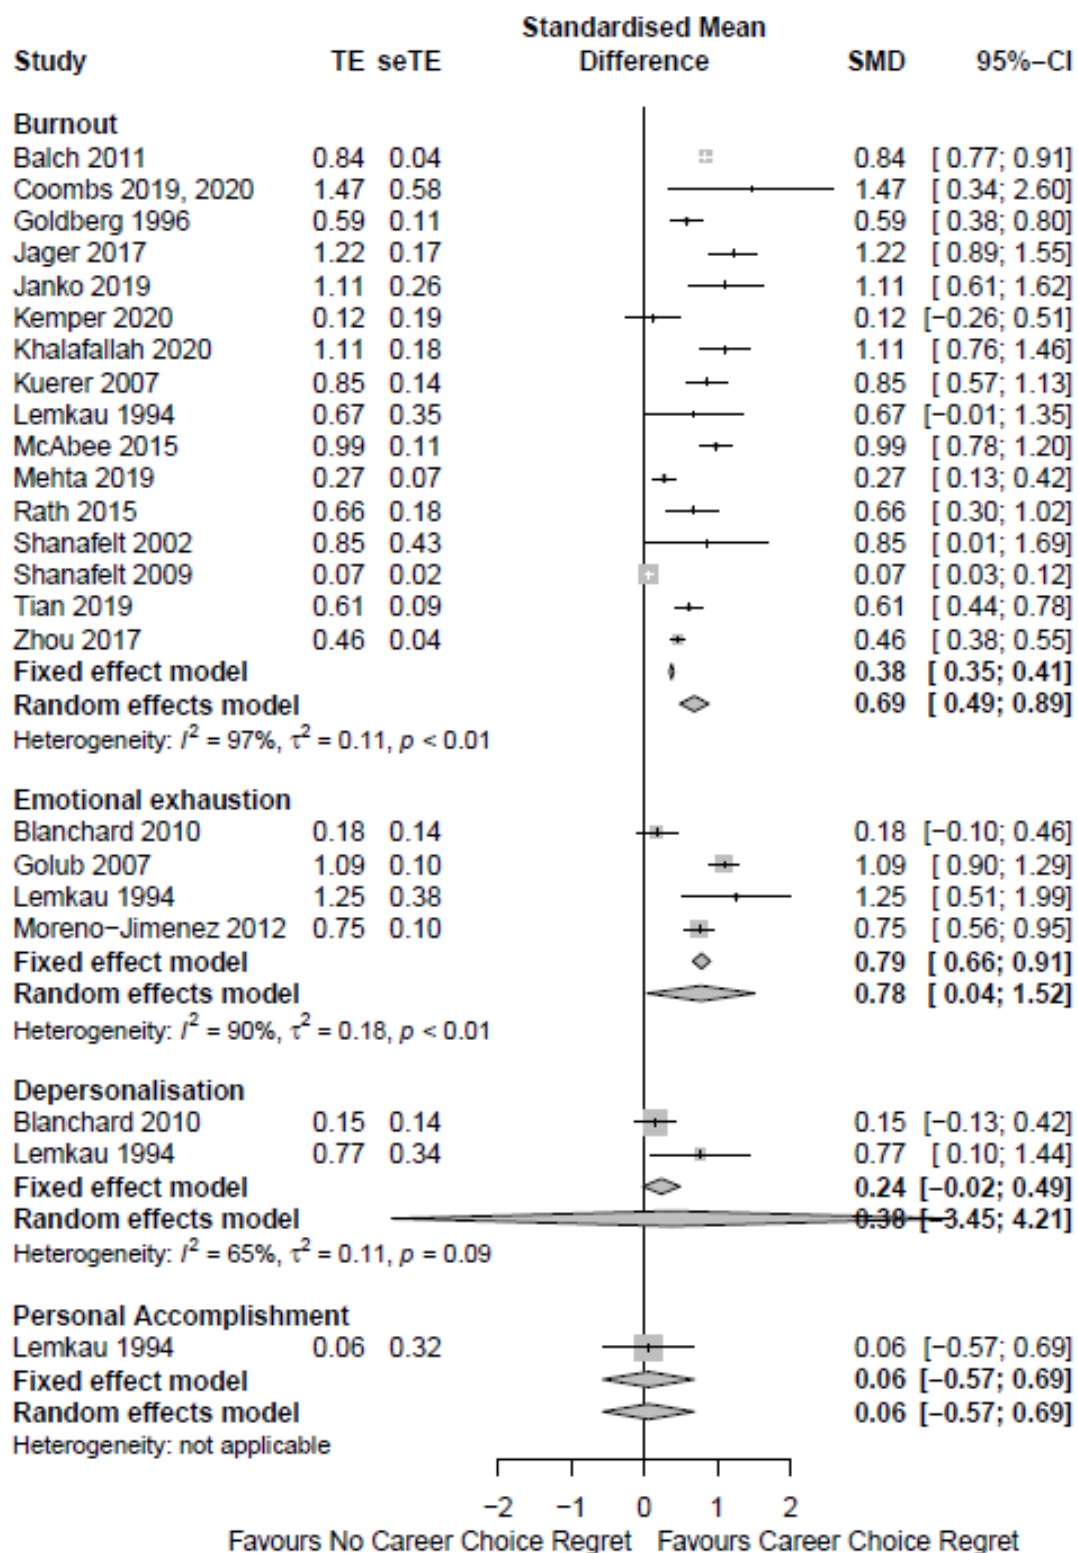

## Career Development

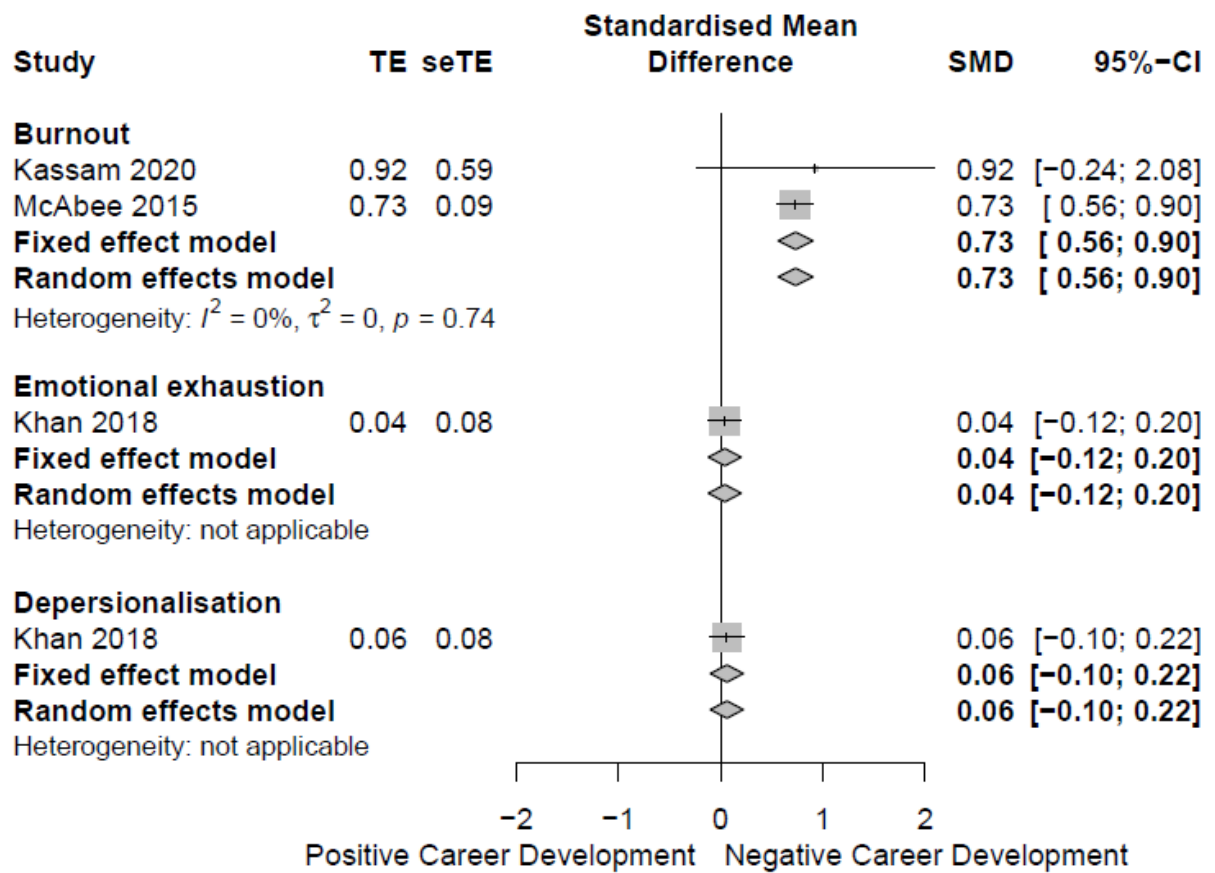

# Job Satisfaction

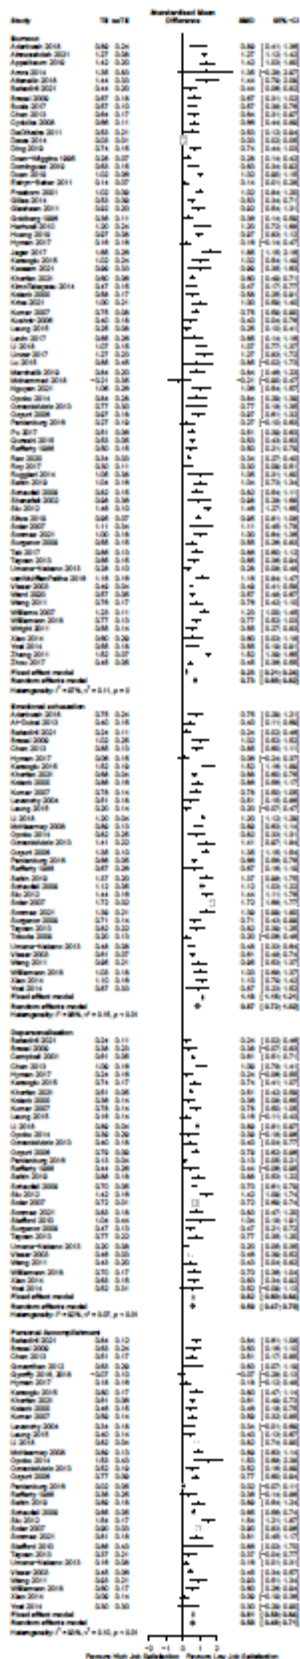

# Patient safety incidents

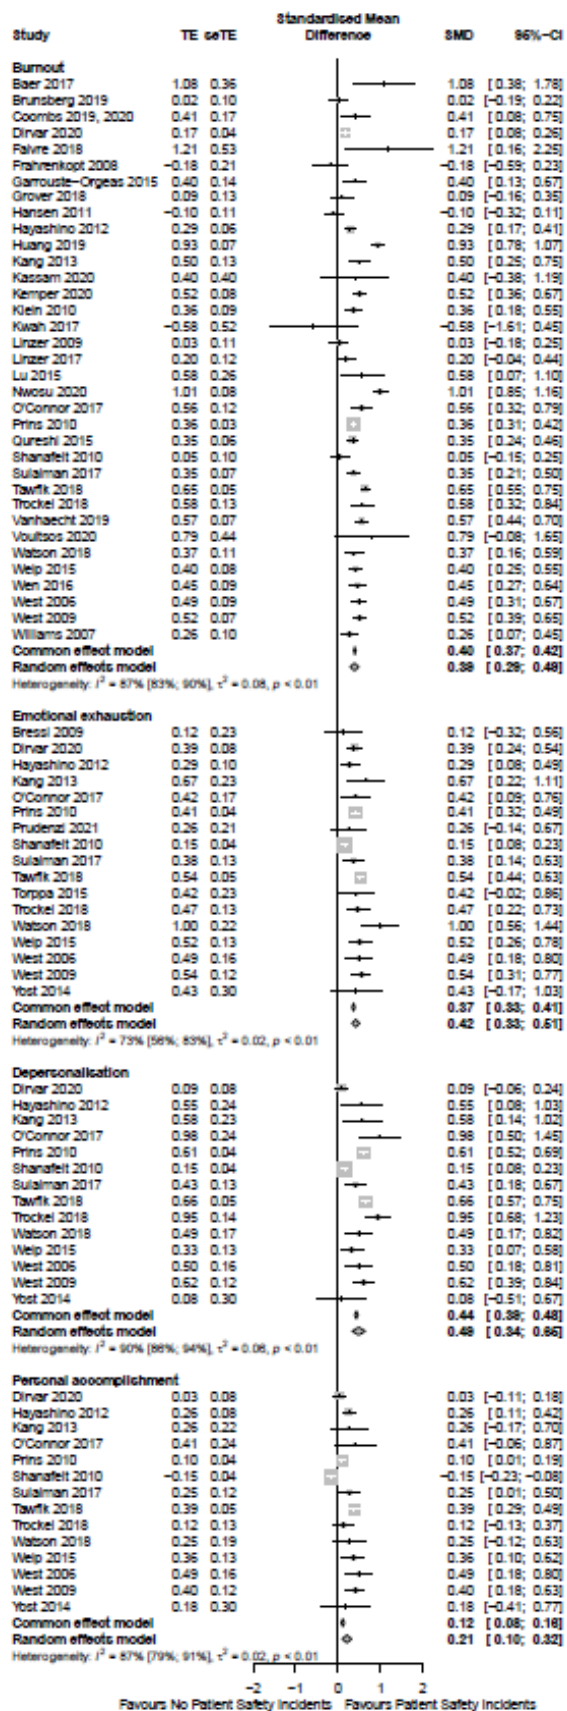

**Patient satisfaction**

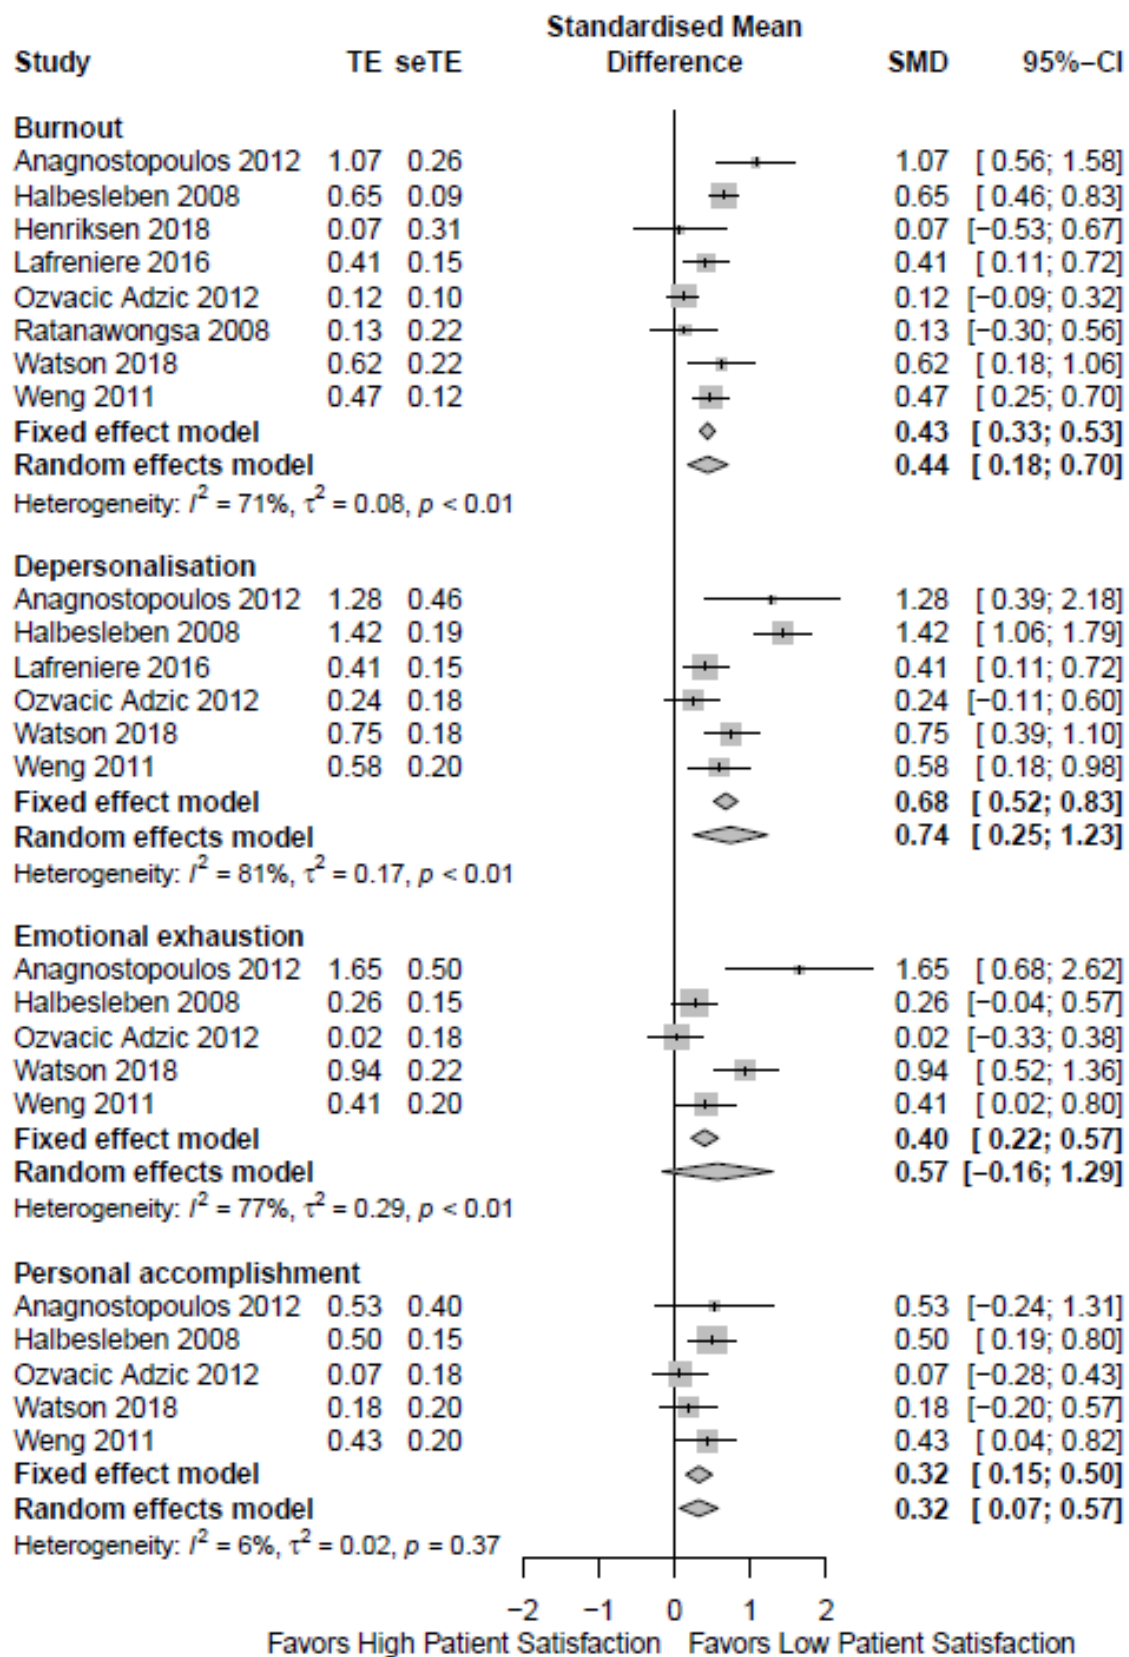

## Productivity

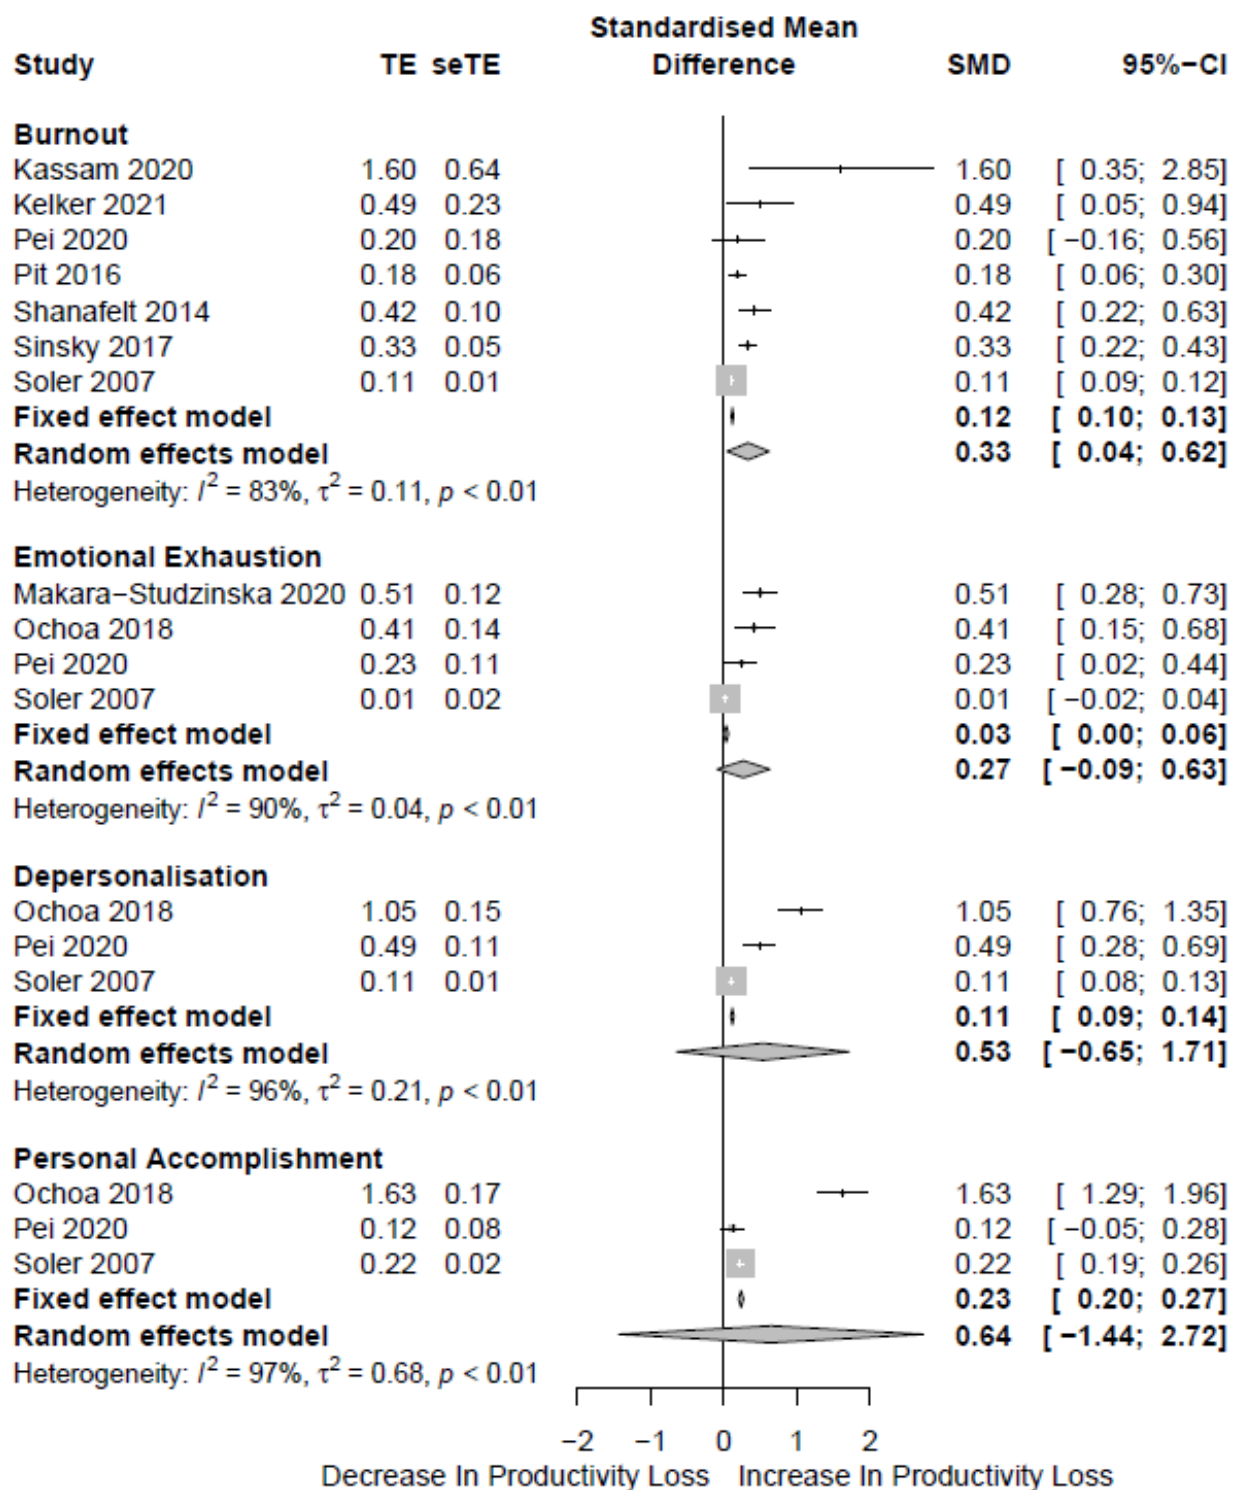

# Professionalism

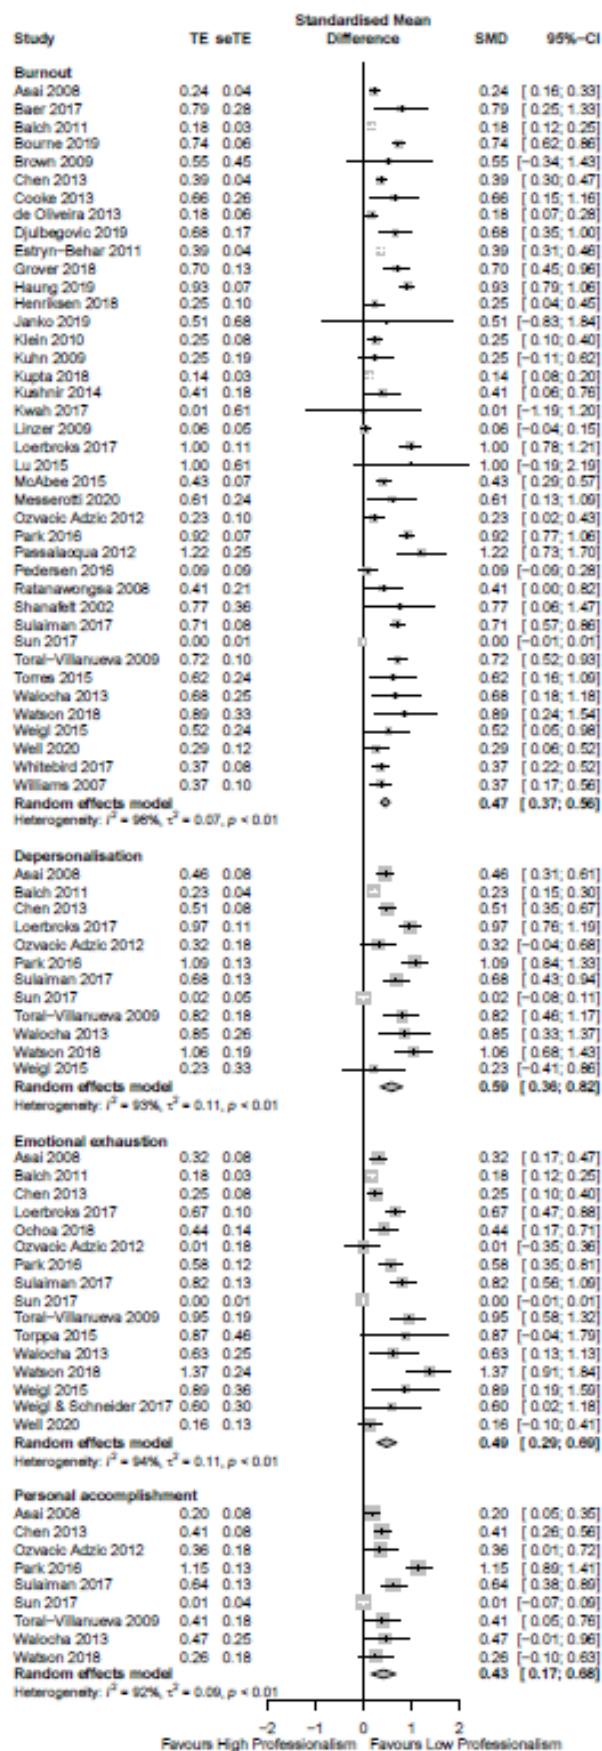

## Turnover Intention

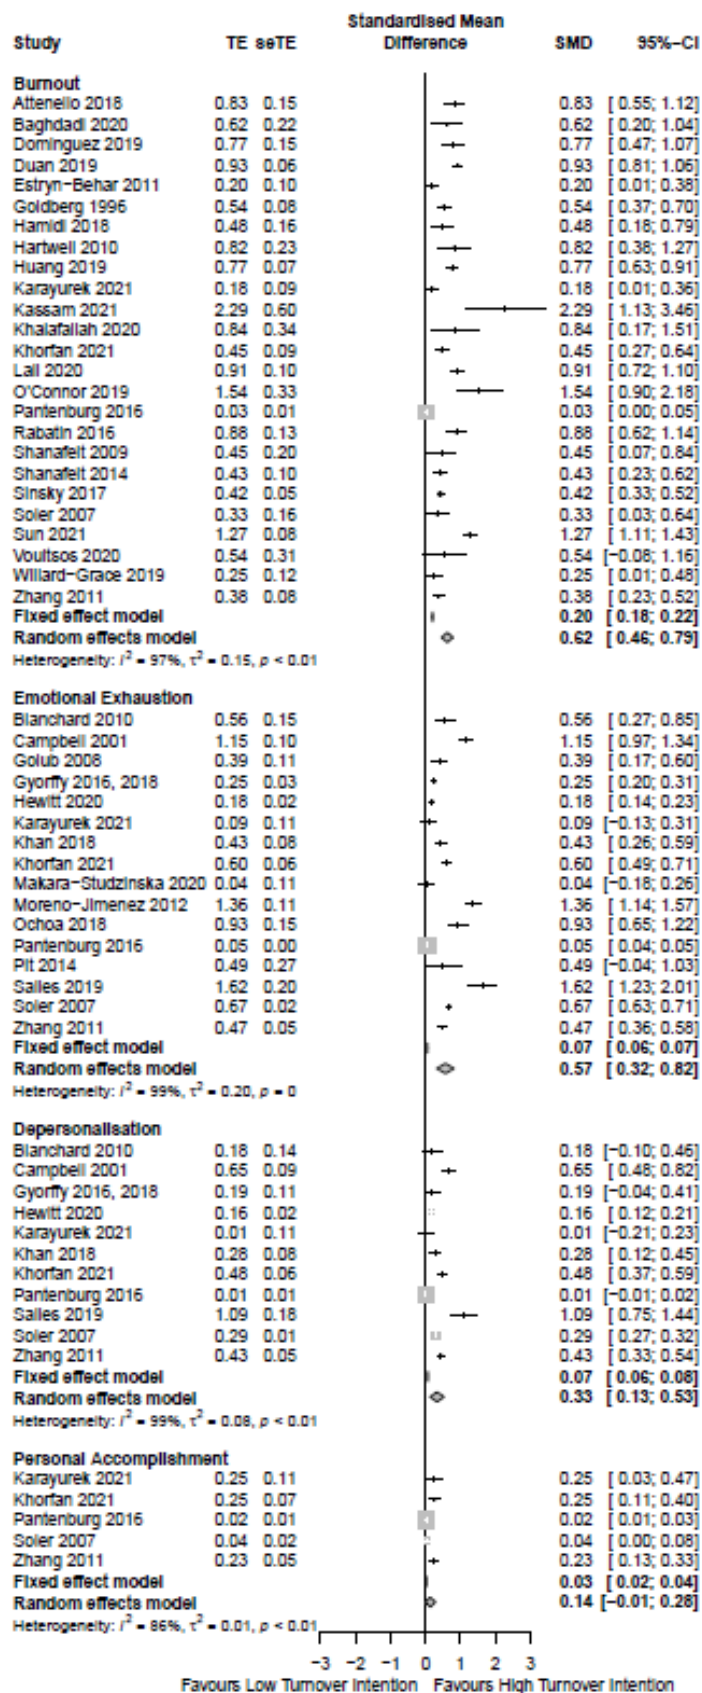



## Appendix 12: Meta-Regressions

Meta-regressions were only done for those involving 10 or more studies. Variables from univariable regressions were included in the multivariable regressions when  $p < 0.10$ .

### Career choice regret:

#### Univariable and multivariable meta-regression analysis for association of physician burnout and career choice regret

| Variable                           | No. of studies | Univariable |             |         | Multivariable <sup>β</sup> |        |         |
|------------------------------------|----------------|-------------|-------------|---------|----------------------------|--------|---------|
|                                    |                | OR          | 95% CI      | P-value | OR                         | 95% CI | P-value |
| <b>Burnout</b>                     |                |             |             |         |                            |        |         |
| <i>Region:</i>                     |                |             |             |         |                            |        |         |
| - US                               | 13             | 1           | -           | -       | 1                          | -      | -       |
| - UK/EU                            | 0              | NA          | NA          | NA      | NA                         | NA     | NA      |
| - Commonwealth                     | 1              | 0.93        | 0.16, 5.22  | 0.925   | NA                         | NA     | NA      |
| - Southeast Asia/Other             | 2              | 0.73        | 0.25, 2.11  | 0.530   | NA                         | NA     | NA      |
| <i>Setting:</i>                    |                |             |             |         |                            |        |         |
| - Primary Care                     | 1              | 1           | -           | -       | 1                          | -      | -       |
| - Hospital                         | 12             | 1.08        | 0.14, 8.70  | 0.934   | NA                         | NA     | NA      |
| - Mixed                            | 3              | 0.75        | 0.08, 6.68  | 0.780   | NA                         | NA     | NA      |
| <i>Design:</i>                     |                |             |             |         |                            |        |         |
| - Cross-sectional                  | 16             | 1           | -           | -       | 1                          | -      | -       |
| - Prospective cohort/Longitudinal  | 0              | NA          | NA          | NA      | NA                         | NA     | NA      |
| <i>Age:</i>                        |                |             |             |         |                            |        |         |
| - 31 to ≤ 50 yrs.                  | 6              | 1           | -           | -       | 1                          | -      | -       |
| - 20 to ≤ 30 yrs.                  | 2              | 0.87        | 0.75, 5.30  | 0.834   | NA                         | NA     | NA      |
| - > 50 yrs.                        | 3              | 0.81        | 0.21, 3.67  | 0.600   | NA                         | NA     | NA      |
| <i>Gender:</i>                     |                |             |             |         |                            |        |         |
| - Females                          | 4              | 1           | -           | -       | 1                          | -      | -       |
| - Males                            | 12             | 1.56        | 0.67, 3.62  | 0.273   | NA                         | NA     | NA      |
| - Mixed                            | 0              | NA          | NA          | NA      | NA                         | NA     | NA      |
| <i>Speciality of professional:</i> |                |             |             |         |                            |        |         |
| - Internal medicine/Physician      | 1              | 1           | -           | -       | 1                          | -      | -       |
| - GP                               | 0              | NA          | NA          | NA      | NA                         | NA     | NA      |
| - Surgery/Neurosurgery             | 6              | 1.77        | 0.07, 11.47 | 0.560   | NA                         | NA     | NA      |

|                               |    |      |             |              |    |    |    |
|-------------------------------|----|------|-------------|--------------|----|----|----|
| - Emergency medicine & ICU    | 1  | 2.89 | 0.97, 14.89 | <b>0.098</b> | NA | NA | NA |
| - Cancer                      | 1  | 0.98 | 0.06, 30.71 | 0.990        | NA | NA | NA |
| - Interns/Residents           | 1  | 1.38 | 0.02, 5.69  | 0.813        | NA | NA | NA |
| - Paediatrics                 | 1  | 0.37 | 0.07, 6.97  | 0.418        | NA | NA | NA |
| - Psychiatry                  | 0  | NA   | NA          | NA           | NA | NA | NA |
| - Mixed                       | 2  | 0.68 | 0.08, 6.92  | 0.710        | NA | NA | NA |
| - Neurology                   | 2  | 2.52 | 0.82, 7.80  | <b>0.095</b> | NA | NA | NA |
| - Other                       | 1  | 0.48 | 0.04, 6.03  | 0.518        | NA | NA | NA |
| <i>Working Experience:</i>    |    |      |             |              |    |    |    |
| - Experienced (> 6 yrs.)      | 6  | 1    | -           | -            | 1  | -  | -  |
| - Resident (≤ 6 yrs.)         | 4  | 0.67 | 0.23, 1.91  | 0.419        | NA | NA | NA |
| - Mixture                     | 5  | 0.43 | 0.22, 1.09  | 0.173        | NA | NA | NA |
| <i>Burnout measure:</i>       |    |      |             |              |    |    |    |
| - Burnout (MBI)               | 15 | 1    | -           | -            | 1  | -  | -  |
| - Mixed/other                 | 1  | 0.43 | 0.07, 2.58  | 0.328        | NA | NA | NA |
| <b>NOS Quality assessment</b> |    |      |             |              |    |    |    |
| <i>Risk of Bias:</i>          |    |      |             |              |    |    |    |
| - Low                         | 8  | 1    | -           | -            | 1  | -  | -  |
| - Medium                      | 4  | 0.47 | 0.15, 3.71  | 0.331        | NA | NA | NA |
| - High                        | 4  | 0.87 | 0.32, 2.71  | 0.489        | NA | NA | NA |
| <b>Model fit indices</b>      |    |      |             |              | NA |    |    |

NA=not applicable; <sup>†</sup>Only variables with a P ≤ 0.10 were add to the multivariable model.

**Job Satisfaction:**

**Univariable and multivariable meta-regression analysis for association of physician burnout and Job Satisfaction**

| Variable                           | No. | Univariable |            |              | Multivariable |             |              |
|------------------------------------|-----|-------------|------------|--------------|---------------|-------------|--------------|
|                                    |     | OR          | 95% CI     | P-value      | OR            | 95% CI      | P-value      |
| <b>Burnout</b>                     |     |             |            |              |               |             |              |
| <i>Region:</i>                     |     |             |            |              |               |             |              |
| - US                               | 30  | 1           | -          | -            | 1             | -           | -            |
| - UK/EU                            | 18  | 0.82        | 0.44, 1.52 | 0.518        | NA            | NA          | NA           |
| - Commonwealth                     | 7   | 1.34        | 0.56, 3.16 | 0.513        | NA            | NA          | NA           |
| - Southeast Asia/Other             | 18  | 0.62        | 0.34, 1.12 | 0.110        | NA            | NA          | NA           |
| <i>Setting:</i>                    |     |             |            |              |               |             |              |
| - Primary Care                     | 11  | 1           | -          | -            | 1             | -           | -            |
| - Hospital                         | 40  | 1.88        | 0.91, 3.86 | <b>0.086</b> | 1.11          | 0.43, 2.83  | 0.842        |
| - Mixed                            | 22  | 2.12        | 0.96, 4.62 | <b>0.061</b> | 1.54          | 0.54, 4.35  | 0.419        |
| <i>Design:</i>                     |     |             |            |              |               |             |              |
| - Cross-sectional                  | 70  | 1           | -          | -            | 1             | -           | -            |
| - Prospective cohort/Longitudinal  | 3   | 1.03        | 0.31, 3.46 | 0.955        | NA            | NA          | NA           |
| <i>Age:</i>                        |     |             |            |              |               |             |              |
| - 31 to ≤ 50 yrs.                  | 11  | 1           | -          | -            | 1             | -           | -            |
| - 20 to ≤ 30 yrs.                  | 43  | 1.03        | 0.50, 2.12 | 0.946        | 1.09          | 0.52, 2.29  | 0.809        |
| - > 50 yrs.                        | 7   | 2.41        | 1.02, 5.64 | <b>0.044</b> | 0.66          | 0.27, 1.63  | 0.371        |
| <i>Gender:</i>                     |     |             |            |              |               |             |              |
| - Females                          | 16  | 1           | -          | -            | 1             | -           | -            |
| - Males                            | 56  | 0.67        | 0.38, 1.20 | 0.172        | 0.78          | 0.37, 1.63  | 0.513        |
| - Mixed                            | 1   | 0.02        | 0.01, 0.24 | <b>0.003</b> | 0.03          | 0.02, 0.38  | <b>0.007</b> |
| <i>Speciality of professional:</i> |     |             |            |              |               |             |              |
| - Internal medicine/Physician      | 15  | 1           | -          | -            | 1             | -           | -            |
| - GP                               | 2   | 0.16        | 0.03, 0.88 | <b>0.036</b> | 0.23          | 0.04, 1.26  | 0.107        |
| - Surgery/Neurosurgery             | 11  | 0.77        | 0.34, 1.77 | 0.531        | 0.86          | 0.33, 2.25  | 0.754        |
| - Emergency medicine & ICU         | 11  | 2.16        | 0.98, 4.76 | <b>0.056</b> | 1.95          | 0.80, 4.76  | 0.138        |
| - Cancer                           | 2   | 2.03        | 0.42, 9.68 | 0.372        | 2.14          | 0.44, 10.38 | 0.343        |
| - Interns/Residents                | 2   | 1.21        | 0.24, 6.11 | 0.813        | 0.72          | 0.12, 4.14  | 0.711        |
| - Paediatrics                      | 3   | 1.80        | 0.52, 6.36 | 0.350        | 1.48          | 0.41, 5.37  | 0.548        |
| - Psychiatry                       | 3   | 2.18        | 0.64, 7.54 | 0.209        | 2.16          | 0.59, 7.77  | 0.244        |
| - Mixed                            | 15  | 1.07        | 0.54, 2.12 | 0.835        | 0.91          | 0.39, 2.14  | 0.837        |
| - Neurology                        | 5   | 2.20        | 0.81, 5.99 | 0.119        | 1.84          | 0.55, 6.11  | 0.317        |
| - Other                            | 4   | 1.97        | 0.64, 6.17 | 0.234        | 1.65          | 0.51, 5.31  | 0.402        |

|                                    |    |       |              |       |                                  |    |    |
|------------------------------------|----|-------|--------------|-------|----------------------------------|----|----|
| <i>Working Experience:</i>         |    |       |              |       |                                  |    |    |
| - Experienced (> 6 yrs.)           | 25 | 1     | -            | -     | 1                                | -  | -  |
| - Resident (≤ 6 yrs.)              | 13 | 1.08  | 0.50, 2.36   | 0.846 | NA                               | NA | NA |
| - Mixture                          | 26 | 1.04  | 0.57, 1.90   | 0.900 | NA                               | NA | NA |
| <i>Burnout measure:</i>            |    |       |              |       |                                  |    |    |
| - Burnout (MBI)                    | 55 | 1     | -            | -     | 1                                | -  | -  |
| - Mixed/other                      | 18 | 0.69  | 0.39, 1.20   | 0.186 | NA                               | NA | NA |
| <b>NOS Quality assessment</b>      |    |       |              |       |                                  |    |    |
| <i>Risk of Bias:</i>               |    |       |              |       |                                  |    |    |
| - Low                              | 30 | 1     | -            | -     | 1                                | -  | -  |
| - Medium                           | 18 | 0.73  | 0.39, 1.36   | 0.319 | NA                               | NA | NA |
| - High                             | 25 | 0.82  | 0.47, 1.43   | 0.407 | NA                               | NA | NA |
| <b>Model fit indices</b>           |    |       |              |       | $\chi^2 = 147.95$ , $P < 0.0001$ |    |    |
| <b>Emotional Exhaustion</b>        |    |       |              |       |                                  |    |    |
| <i>Region:</i>                     |    |       |              |       |                                  |    |    |
| - US                               | 6  | 1     | -            | -     | 1                                | -  | -  |
| - UK/EU                            | 13 | 0.38  | 0.08, 1.77   | 0.208 | NA                               | NA | NA |
| - Commonwealth                     | 5  | 0.42  | 0.06, 2.97   | 0.376 | NA                               | NA | NA |
| - Southeast Asia/Other             | 9  | 0.43  | 0.08, 2.23   | 0.305 | NA                               | NA | NA |
| <i>Setting:</i>                    |    |       |              |       |                                  |    |    |
| - Primary Care                     | 8  | 1     | -            | -     | 1                                | -  | -  |
| - Hospital                         | 18 | 1.14  | 0.29, 4.44   | 0.852 | NA                               | NA | NA |
| - Mixed                            | 7  | 1.27  | 0.23, 6.89   | 0.780 | NA                               | NA | NA |
| <i>Design:</i>                     |    |       |              |       |                                  |    |    |
| - Cross-sectional                  | 31 | 1     | -            | -     | 1                                | -  | -  |
| - Prospective cohort/Longitudinal  | 2  | 12.81 | 0.75, 122.73 | 0.972 | NA                               | NA | NA |
| <i>Age:</i>                        |    |       |              |       |                                  |    |    |
| - 31 to ≤ 50 yrs.                  | 21 | 1     | -            | -     | 1                                | -  | -  |
| - 20 to ≤ 30 yrs.                  | 7  | 0.99  | 0.25, 3.97   | 0.994 | NA                               | NA | NA |
| - > 50 yrs.                        | 4  | 0.31  | 0.06, 1.70   | 0.171 | NA                               | NA | NA |
| <i>Gender:</i>                     |    |       |              |       |                                  |    |    |
| - Females                          | 7  | 1     | -            | -     | 1                                | -  | -  |
| - Males                            | 26 | 0.84  | 0.22, 3.16   | 0.784 | NA                               | NA | NA |
| - Mixed                            | 0  | NA    | NA           | NA    | NA                               | NA | NA |
| <i>Speciality of professional:</i> |    |       |              |       |                                  |    |    |
| - Internal medicine/Physician      | 7  | 1     | -            | -     | 1                                | -  | -  |
| - GP                               | 3  | 1.34  | 0.11, 16.28  | 0.812 | NA                               | NA | NA |
| - Surgery/Neurosurgery             | 2  | 0.46  | 0.04, 4.90   | 0.505 | NA                               | NA | NA |
| - Emergency medicine & ICU         | 3  | 1.45  | 0.17, 12.30  | 0.725 | NA                               | NA | NA |

|                                   |    |      |              |              |                     |            |              |
|-----------------------------------|----|------|--------------|--------------|---------------------|------------|--------------|
| - Cancer                          | 1  | 5.47 | 0.14, 214.86 | 0.352        | NA                  | NA         | NA           |
| - Interns/Residents               | 2  | 1.92 | 0.13, 29.08  | 0.626        | NA                  | NA         | NA           |
| - Paediatrics                     | 1  | 0.50 | 0.01, 20.70  | 0.704        | NA                  | NA         | NA           |
| - Psychiatry                      | 3  | 0.49 | 0.06, 4.26   | 0.503        | NA                  | NA         | NA           |
| - Mixed                           | 8  | 0.98 | 0.17, 5.70   | 0.978        | NA                  | NA         | NA           |
| - Neurology                       | 0  | NA   | NA           | NA           | NA                  | NA         | NA           |
| - Other                           | 3  | 1.14 | 0.11, 11.82  | 0.910        | NA                  | NA         | NA           |
| <i>Working Experience:</i>        |    |      |              |              |                     |            |              |
| - Experienced (> 6 yrs.)          | 13 | 1    | -            | -            | 1                   | -          | -            |
| - Resident (≤ 6 yrs.)             | 4  | 1.46 | 0.21, 9.97   | 0.689        | NA                  | NA         | NA           |
| - Mixture                         | 13 | 1.86 | 0.52, 6.62   | 0.328        | NA                  | NA         | NA           |
| <i>Burnout measure:</i>           |    |      |              |              |                     |            |              |
| - MBI                             | 32 | 1    | -            | -            | 1                   | -          | -            |
| - Mixed/other                     | 1  | 0.38 | 0.02, 8.00   | 0.521        | NA                  | NA         | NA           |
| <b>NOS Quality assessment</b>     |    |      |              |              |                     |            |              |
| <i>Risk of Bias:</i>              |    |      |              |              |                     |            |              |
| - Low                             | 18 | 1    | -            | -            | 1                   | -          | -            |
| - Medium                          | 5  | 1.55 | 0.32, 7.61   | 0.577        | NA                  | NA         | NA           |
| - High                            | 10 | 1.55 | 0.47, 5.05   | 0.460        | NA                  | NA         | NA           |
| <b>Model fit indices</b>          |    |      |              |              | $\chi^2 = NA, P=NA$ |            |              |
| <b>Depersonalization</b>          |    |      |              |              |                     |            |              |
| <i>Region:</i>                    |    |      |              |              |                     |            |              |
| - US                              | 6  | 1    | -            | -            | 1                   | -          | -            |
| - UK/EU                           | 11 | 0.65 | 0.28, 1.54   | 0.315        | NA                  | NA         | NA           |
| - Commonwealth                    | 4  | 0.88 | 0.27, 2.86   | 0.826        | NA                  | NA         | NA           |
| - South East Asia/Other           | 9  | 0.76 | 0.31, 1.92   | 0.556        | NA                  | NA         | NA           |
| <i>Setting:</i>                   |    |      |              |              |                     |            |              |
| - Primary Care                    | 5  | 1    | -            | -            | 1                   | -          | -            |
| - Hospital                        | 18 | 1.09 | 0.46, 2.59   | 0.834        | NA                  | NA         | NA           |
| - Mixed                           | 7  | 1.40 | 0.53, 3.74   | 0.486        | NA                  | NA         | NA           |
| <i>Design:</i>                    |    |      |              |              |                     |            |              |
| - Cross-sectional                 | 29 | 1    | -            | -            | 1                   | -          | -            |
| - Prospective cohort/Longitudinal | 1  | 1.54 | 0.24, 10.07  | 0.640        | NA                  | NA         | NA           |
| <i>Age:</i>                       |    |      |              |              |                     |            |              |
| - 31 to ≤ 50 yrs.                 | 6  | 1    | -            | -            | 1                   | -          | -            |
| - 20 to ≤ 30 yrs.                 | 19 | 1.04 | 0.51, 2.12   | 0.911        | 1.15                | 0.55, 2.39 | 0.717        |
| - > 50 yrs.                       | 3  | 4.81 | 1.97, 11.70  | <b>0.001</b> | 0.24                | 0.09, 0.61 | <b>0.003</b> |
| <i>Gender:</i>                    |    |      |              |              |                     |            |              |
| - Females                         | 6  | 1    | -            | -            | 1                   | -          | -            |

|                                    |    |      |             |              |                              |            |               |
|------------------------------------|----|------|-------------|--------------|------------------------------|------------|---------------|
| - Males                            | 24 | 0.79 | 0.38, 1.67  | 0.537        | NA                           | NA         | NA            |
| - Mixed                            | 0  | NA   | NA          | NA           | NA                           | NA         | NA            |
| <i>Speciality of professional:</i> |    |      |             |              |                              |            |               |
| - Internal medicine/Physician      | 5  | 1    | -           | -            | 1                            | -          | -             |
| - GP                               | 1  | 1.70 | 0.25, 11.36 | 0.571        | NA                           | NA         | NA            |
| - Surgery/Neurosurgery             | 3  | 0.65 | 0.19, 2.27  | 0.484        | NA                           | NA         | NA            |
| - Emergency medicine & ICU         | 4  | 1.21 | 0.34, 4.39  | 0.757        | NA                           | NA         | NA            |
| - Cancer                           | 2  | 1.35 | 0.24, 7.69  | 0.723        | NA                           | NA         | NA            |
| - Interns/Residents                | 1  | 0.99 | 0.15, 6.75  | 0.992        | NA                           | NA         | NA            |
| - Paediatrics                      | 1  | 0.91 | 0.10, 8.00  | 0.936        | NA                           | NA         | NA            |
| - Psychiatry                       | 3  | 1.54 | 0.38, 6.17  | 0.529        | NA                           | NA         | NA            |
| - Mixed                            | 8  | 1.13 | 0.39, 3.22  | 0.820        | NA                           | NA         | NA            |
| - Neurology                        | 0  | NA   | NA          | NA           | NA                           | NA         | NA            |
| - Other                            | 2  | 0.72 | 0.15, 3.39  | 0.661        | NA                           | NA         | NA            |
| <i>Working Experience:</i>         |    |      |             |              |                              |            |               |
| - Experienced (> 6 yrs.)           | 11 | 1    | -           | -            | 1                            | -          | -             |
| - Resident (≤ 6 yrs.)              | 3  | 1.68 | 0.54, 5.21  | 0.357        | NA                           | NA         | NA            |
| - Mixture                          | 12 | 1.46 | 0.73, 2.92  | 0.271        | NA                           | NA         | NA            |
| <i>Burnout measure:</i>            |    |      |             |              |                              |            |               |
| - MBI                              | 29 | 1    | -           | -            | 1                            | -          | -             |
| - Mixed/other                      | 1  | 0.61 | 0.13, 2.83  | 0.517        | NA                           | NA         | NA            |
| <b>NOS Quality assessment</b>      |    |      |             |              |                              |            |               |
| <i>Risk of Bias:</i>               |    |      |             |              |                              |            |               |
| - Low                              | 15 | 1    | -           | -            | 1                            | -          | -             |
| - Medium                           | 5  | 1.21 | 0.52, 2.83  | 0.642        | 0.93                         | 0.44, 1.97 | 0.852         |
| - High                             | 10 | 1.72 | 0.90, 3.25  | <b>0.098</b> | 1.36                         | 0.75, 2.46 | 0.317         |
| <b>Model fit indices</b>           |    |      |             |              | $\chi^2 = 63.93, P < 0.0001$ |            |               |
| <b>Personal Accomplishment</b>     |    |      |             |              |                              |            |               |
| <i>Region:</i>                     |    |      |             |              |                              |            |               |
| - US                               | 7  | 1    | -           | -            | 1                            | -          | -             |
| - UK/EU                            | 12 | 0.44 | 0.16, 1.25  | 0.117        | 0.40                         | 0.20, 0.81 | <b>0.011</b>  |
| - Commonwealth                     | 4  | 0.66 | 0.16, 2.80  | 0.564        | 0.33                         | 0.12, 0.87 | <b>0.024</b>  |
| - Southeast Asia/Other             | 9  | 0.38 | 0.12, 1.17  | <b>0.090</b> | 0.23                         | 0.10, 0.53 | <b>0.0004</b> |
| <i>Setting:</i>                    |    |      |             |              |                              |            |               |
| - Primary Care                     | 7  | 1    | -           | -            | 1                            | -          | -             |
| - Hospital                         | 17 | 1.23 | 0.44, 3.46  | 0.672        | NA                           | NA         | NA            |
| - Mixed                            | 8  | 1.52 | 0.46, 5.00  | 0.480        | NA                           | NA         | NA            |
| <i>Design:</i>                     |    |      |             |              |                              |            |               |
| - Cross-sectional                  | 31 | 1    | -           | -            | 1                            | -          | -             |

|                                    |    |      |             |               |                              |            |                   |
|------------------------------------|----|------|-------------|---------------|------------------------------|------------|-------------------|
| - Prospective cohort/Longitudinal  | 1  | 0.63 | 0.06, 7.03  | 0.699         | NA                           | NA         | NA                |
| <i>Age:</i>                        |    |      |             |               |                              |            |                   |
| - 31 to ≤ 50 yrs.                  | 20 | 1    | -           | -             | 1                            | -          | -                 |
| - 20 to ≤ 30 yrs.                  | 6  | 0.69 | 0.29, 1.62  | 0.380         | 0.44                         | 0.21, 0.95 | <b>0.036</b>      |
| - > 50 yrs.                        | 3  | 8.41 | 2.80, 25.53 | <b>0.0004</b> | 0.07                         | 0.03, 0.19 | <b>&lt;0.0001</b> |
| <i>Gender:</i>                     |    |      |             |               |                              |            |                   |
| - Females                          | 8  | 1    | -           | -             | 1                            | -          | -                 |
| - Males                            | 24 | 0.66 | 0.27, 1.63  | 0.361         | NA                           | NA         | NA                |
| - Mixed                            | 0  | 1.37 | 0.12, 15.96 | 0.795         | NA                           | NA         | NA                |
| <i>Speciality of professional:</i> |    |      |             |               |                              |            |                   |
| - Internal medicine/Physician      | 7  | 1    | -           | -             | 1                            | -          | -                 |
| - GP                               | 2  | 1.08 | 0.13, 9.12  | 0.940         | NA                           | NA         | NA                |
| - Surgery/Neurosurgery             | 3  | 1.21 | 0.19, 7.77  | 0.831         | NA                           | NA         | NA                |
| - Emergency medicine & ICU         | 4  | 1.38 | 0.26, 7.39  | 0.701         | NA                           | NA         | NA                |
| - Cancer                           | 2  | 1.27 | 0.13, 12.06 | 0.830         | NA                           | NA         | NA                |
| - Interns/Residents                | 1  | 1.21 | 0.08, 17.81 | 0.884         | NA                           | NA         | NA                |
| - Paediatrics                      | 1  | 0.92 | 0.05, 16.28 | 0.953         | NA                           | NA         | NA                |
| - Psychiatry                       | 3  | 1.79 | 0.28, 11.02 | 0.539         | NA                           | NA         | NA                |
| - Mixed                            | 5  | 0.98 | 0.24, 3.97  | 0.980         | NA                           | NA         | NA                |
| - Neurology                        | 0  | NA   | NA          | NA            | NA                           | NA         | NA                |
| - Other                            | 4  | 1.07 | 0.20, 5.75  | 0.930         | NA                           | NA         | NA                |
| <i>Working Experience:</i>         |    |      |             |               |                              |            |                   |
| - Experienced (> 6 yrs.)           | 10 | 1    | -           | -             | 1                            | -          | -                 |
| - Resident (≤ 6 yrs.)              | 3  | 3.32 | 0.66, 16.78 | 0.142         | NA                           | NA         | NA                |
| - Mixture                          | 13 | 1.79 | 0.70, 4.53  | 0.215         | NA                           | NA         | NA                |
| <i>Burnout measure:</i>            |    |      |             |               |                              |            |                   |
| - MBI                              | 31 | 1    | -           | -             | 1                            | -          | -                 |
| - Mixed/other                      | 1  | 0.66 | 0.08, 5.53  | 0.690         | NA                           | NA         | NA                |
| <b>NOS Quality assessment</b>      |    |      |             |               |                              |            |                   |
| <i>Risk of Bias:</i>               |    |      |             |               |                              |            |                   |
| - Low                              | 15 | 1    | -           | -             | 1                            | -          | -                 |
| - Medium                           | 6  | 1.23 | 0.42, 3.60  | 0.692         | NA                           | NA         | NA                |
| - High                             | 11 | 1.62 | 0.67, 3.86  | 0.274         | NA                           | NA         | NA                |
| <b>Model fit indices</b>           |    |      |             |               | $\chi^2 = 65.42, P < 0.0001$ |            |                   |

## Patient Safety Incidents:

### Univariable and multivariable meta-regression analysis for association of physician burnout and Patient Safety Incidents

| Variable                           | No. | Univariable |             |              | Multivariable |            |              |
|------------------------------------|-----|-------------|-------------|--------------|---------------|------------|--------------|
|                                    |     | OR          | 95% CI      | P-value      | OR            | 95% CI     | P-value      |
| <b>Burnout</b>                     |     |             |             |              |               |            |              |
| <i>Region:</i>                     |     |             |             |              |               |            |              |
| - US                               | 18  | 1           | -           | -            | 1             | -          | -            |
| - UK/EU                            | 10  | 0.86        | 0.50, 1.46  | 0.567        | 0.73          | 0.45, 1.16 | 0.202        |
| - Commonwealth                     | 1   | 3.03        | 0.83, 11.25 | <b>0.093</b> | 1.86          | 0.65, 5.37 | 0.246        |
| - Southeast Asia/Other             | 6   | 1.02        | 0.55, 1.86  | 0.960        | 0.85          | 0.50, 1.48 | 0.575        |
| <i>Setting:</i>                    |     |             |             |              |               |            |              |
| - Primary Care                     | 4   | 1           | -           | -            | 1             | -          | -            |
| - Hospital                         | 26  | 1.70        | 0.81, 3.56  | 0.154        | NA            | NA         | NA           |
| - Mixed                            | 5   | 1.28        | 0.50, 3.32  | 0.596        | NA            | NA         | NA           |
| <i>Design:</i>                     |     |             |             |              |               |            |              |
| - Cross-sectional                  | 26  | 1           | -           | -            | 1             | -          | -            |
| - Prospective cohort/Longitudinal  | 9   | 1.00        | 0.57, 1.73  | 0.993        | NA            | NA         | NA           |
| <i>Age:</i>                        |     |             |             |              |               |            |              |
| - 31 to ≤ 50 yrs.                  | 10  | 1           | -           | -            | 1             | -          | -            |
| - 20 to ≤ 30 yrs.                  | 13  | 1.88        | 1.07, 3.29  | <b>0.030</b> | 1.55          | 0.94, 2.56 | <b>0.083</b> |
| - > 50 yrs.                        | 4   | 1.20        | 0.60, 2.41  | 0.599        | 1.11          | 0.59, 2.05 | 0.756        |
| <i>Gender:</i>                     |     |             |             |              |               |            |              |
| - Females                          | 9   | 1           | -           | -            | 1             | -          | -            |
| - Males                            | 23  | 1.34        | 0.75, 2.36  | 0.315        | NA            | NA         | NA           |
| - Mixed                            | 2   | 1.46        | 0.48, 4.48  | 0.490        | NA            | NA         | NA           |
| <i>Speciality of professional:</i> |     |             |             |              |               |            |              |
| - Internal medicine/Physician      | 5   | 1           | -           | -            | 1             | -          | -            |
| - GP                               | 1   | 0.96        | 0.22, 4.10  | 0.953        | 1.49          | 0.43, 5.21 | 0.534        |
| - Surgery/Neurosurgery             | 6   | 1.60        | 0.74, 3.49  | 0.221        | 1.20          | 0.64, 2.25 | 0.573        |
| - Emergency medicine & ICU         | 5   | 2.10        | 1.09, 3.56  | <b>0.018</b> | 1.30          | 0.61, 2.72 | 0.497        |
| - Cancer                           | NA  | NA          | NA          | NA           | NA            | NA         | NA           |
| - Interns/Residents                | 4   | 1.80        | 0.80, 4.06  | 0.145        | 1.67          | 0.86, 3.22 | 0.127        |
| - Paediatrics                      | 4   | 1.54        | 0.61, 3.90  | 0.350        | 0.95          | 0.43, 2.12 | 0.911        |
| - Psychiatry                       | NA  | NA          | NA          | NA           | NA            | NA         | NA           |
| - Mixed                            | 8   | 2.20        | 1.11, 4.39  | <b>0.027</b> | 1.92          | 1.05, 3.53 | <b>0.033</b> |
| - Neurology                        | NA  | NA          | NA          | NA           | NA            | NA         | NA           |
| - Other                            | 2   | 2.66        | 0.92, 7.69  | <b>0.069</b> | 1.95          | 0.80, 4.71 | 0.141        |



|                                    |    |      |            |              |                           |            |              |
|------------------------------------|----|------|------------|--------------|---------------------------|------------|--------------|
| <i>Working Experience:</i>         |    |      |            |              |                           |            |              |
| - Experienced (> 6 yrs.)           | 10 | 1    | -          | -            | 1                         | -          | -            |
| - Resident (≤ 6 yrs.)              | 14 | 1.13 | 0.65, 1.95 | 0.658        | NA                        | NA         | NA           |
| - Mixture                          | 6  | 1.55 | 0.79, 3.06 | 0.198        | NA                        | NA         | NA           |
| <i>Burnout measure:</i>            |    |      |            |              |                           |            |              |
| - Burnout (MBI)                    | 28 | 1    | -          | -            | 1                         | -          | -            |
| - Mixed/other                      | 7  | 0.77 | 0.44, 1.35 | 0.353        | NA                        | NA         | NA           |
| <b>NOS Quality assessment</b>      |    |      |            |              |                           |            |              |
| <i>Risk of Bias:</i>               |    |      |            |              |                           |            |              |
| - Low                              | 9  | 1    | -          | -            | 1                         | -          | -            |
| - Medium                           | 11 | 0.93 | 0.51, 0.68 | 0.823        | NA                        | NA         | NA           |
| - High                             | 15 | 0.68 | 0.38, 1.20 | 0.170        | NA                        | NA         | NA           |
| <b>Model fit indices</b>           |    |      |            |              | $\chi^2 = 37.22, P=0.016$ |            |              |
| <b>Emotional Exhaustion</b>        |    |      |            |              |                           |            |              |
| <i>Region:</i>                     |    |      |            |              |                           |            |              |
| - US                               | 7  | 1    | -          | -            | 1                         | -          | -            |
| - UK/EU                            | 7  | 1.36 | 0.84, 2.25 | 0.195        | NA                        | NA         | NA           |
| - Commonwealth                     | 0  | NA   | NA         | NA           | NA                        | NA         | NA           |
| - Southeast Asia/Other             | 3  | 1.43 | 0.76, 2.72 | 0.254        | NA                        | NA         | NA           |
| <i>Setting:</i>                    |    |      |            |              |                           |            |              |
| - Primary Care                     | 1  | 1    | -          | -            | 1                         | -          | -            |
| - Hospital                         | 14 | NA   | NA         | NA           | NA                        | NA         | NA           |
| - Mixed                            | 2  | NA   | NA         | NA           | NA                        | NA         | NA           |
| <i>Design:</i>                     |    |      |            |              |                           |            |              |
| - Cross-sectional                  | 11 | 1    | -          | -            | 1                         | -          | -            |
| - Prospective cohort/Longitudinal  | 6  | 1.23 | 0.76, 2.01 | 0.373        | NA                        | NA         | NA           |
| <i>Age:</i>                        |    |      |            |              |                           |            |              |
| - 31 to ≤ 50 yrs.                  | 6  | 1    | -          | -            | 1                         | -          | -            |
| - 20 to ≤ 30 yrs.                  | 6  | 1.12 | 0.77, 1.62 | 0.541        | NA                        | NA         | NA           |
| - > 50 yrs.                        | 2  | 1.30 | 0.86, 1.95 | 0.194        | NA                        | NA         | NA           |
| <i>Gender:</i>                     |    |      |            |              |                           |            |              |
| - Females                          | 6  | 1    | -          | -            | 1                         | -          | -            |
| - Males                            | 9  | 0.83 | 0.53, 1.30 | 0.372        | NA                        | NA         | NA           |
| - Mixed                            | 2  | 1.38 | 0.64, 2.94 | 0.385        | NA                        | NA         | NA           |
| <i>Speciality of professional:</i> |    |      |            |              |                           |            |              |
| - Internal medicine/Physician      | 1  | 1    | -          | -            | 1                         | -          | -            |
| - GP                               | 1  | 2.05 | 0.58, 7.24 | 0.231        | 2.05                      | 0.58, 7.24 | 0.231        |
| - Surgery/Neurosurgery             | 3  | 1.99 | 1.09, 3.60 | <b>0.028</b> | 1.99                      | 1.09, 3.60 | <b>0.028</b> |
| - Emergency medicine & ICU         | 2  | 3.39 | 1.54, 7.46 | <b>0.006</b> | 3.39                      | 1.54, 7.46 | <b>0.006</b> |

|                                   |    |      |            |              |      |            |              |
|-----------------------------------|----|------|------------|--------------|------|------------|--------------|
| - Cancer                          | NA | NA   | NA         | NA           | NA   | NA         | NA           |
| - Interns/Residents               | 4  | 2.25 | 1.43, 3.56 | <b>0.003</b> | 2.25 | 1.43, 3.56 | <b>0.003</b> |
| - Paediatrics                     | 1  | 1.28 | 0.50, 3.25 | 0.570        | 1.28 | 0.50, 3.25 | 0.570        |
| - Psychiatry                      | 1  | 1.19 | 0.34, 4.18 | 0.769        | 1.19 | 0.34, 4.18 | 0.769        |
| - Mixed                           | 4  | 1.05 | 0.81, 1.35 | 0.694        | 1.05 | 0.81, 1.35 | 0.694        |
| - Neurology                       | NA | NA   | NA         | NA           | NA   | NA         | NA           |
| - Other                           | NA | NA   | NA         | NA           | NA   | NA         | NA           |
| <i>Working Experience:</i>        |    |      |            |              |      |            |              |
| - Experienced (> 6 yrs.)          | 3  | 1    | -          | -            | 1    | -          | -            |
| - Resident (≤ 6 yrs.)             | 7  | 0.71 | 0.35, 1.48 | 0.334        | NA   | NA         | NA           |
| - Mixture                         | 5  | 0.67 | 0.31, 1.43 | 0.278        | NA   | NA         | NA           |
| <i>Burnout measure:</i>           |    |      |            |              |      |            |              |
| - MBI                             | 17 | 1    | -          | -            | 1    | -          | -            |
| - Mixed/other                     | 0  | NA   | NA         | NA           | NA   | NA         | NA           |
| <b>NOS Quality assessment</b>     |    |      |            |              |      |            |              |
| <i>Risk of Bias:</i>              |    |      |            |              |      |            |              |
| - Low                             | 3  | 1    | -          | -            | 1    | -          | -            |
| - Medium                          | 6  | 1.27 | 0.64, 2.51 | 0.476        | NA   | NA         | NA           |
| - High                            | 8  | 0.76 | 0.40, 1.39 | 0.341        | NA   | NA         | NA           |
| <b>Model fit indices</b>          |    |      |            |              |      | NA         |              |
| <b>Depersonalization</b>          |    |      |            |              |      |            |              |
| <i>Region:</i>                    |    |      |            |              |      |            |              |
| - US                              | 7  | 1    | -          | -            | 1    | -          | -            |
| - UK/EU                           | 4  | 1.57 | 0.71, 3.42 | 0.236        | NA   | NA         | NA           |
| - Commonwealth                    | 0  | NA   | NA         | NA           | NA   | NA         | NA           |
| - Southeast Asia/Other            | 3  | 1.04 | 0.41, 2.64 | 0.923        | NA   | NA         | NA           |
| <i>Setting:</i>                   |    |      |            |              |      |            |              |
| - Hospital                        | 12 | 1    | -          | -            | 1    | -          | -            |
| - Primary care                    | 0  | NA   | NA         | NA           | NA   | NA         | NA           |
| - Mixed                           | 2  | 0.90 | 0.38, 2.14 | 0.798        | NA   | NA         | NA           |
| <i>Design:</i>                    |    |      |            |              |      |            |              |
| - Cross-sectional                 | 9  | 1    | -          | -            | 1    | -          | -            |
| - Prospective cohort/Longitudinal | 5  | 2.39 | 1.32, 4.31 | <b>0.008</b> | 1.65 | 0.63, 4.35 | 0.306        |
| <i>Age:</i>                       |    |      |            |              |      |            |              |
| - 31 to ≤ 50 yrs.                 | 4  | 1    | -          | -            | 1    | -          | -            |
| - 20 to ≤ 30 yrs.                 | 5  | 1.17 | 0.57, 2.44 | 0.623        | 1.31 | 0.50, 3.46 | 0.558        |
| - > 50 yrs.                       | 2  | 0.45 | 0.27, 0.75 | <b>0.006</b> | 0.67 | 0.25, 1.79 | 0.422        |
| <i>Gender:</i>                    |    |      |            |              |      |            |              |
| - Females                         | 2  | 1    | -          | -            | 1    | -          | -            |

|                                    |    |      |            |              |                            |             |       |
|------------------------------------|----|------|------------|--------------|----------------------------|-------------|-------|
| - Males                            | 9  | 0.35 | 0.16, 0.74 | <b>0.011</b> | 0.72                       | 0.14, 3.67  | 0.695 |
| - Mixed                            | 2  | 0.93 | 0.27, 3.22 | 0.903        | 0.87                       | 0.05, 16.12 | 0.926 |
| <i>Speciality of professional:</i> |    |      |            |              |                            |             |       |
| - Internal medicine/Physician      | 1  | 1    | -          | -            | 1                          | -           | -     |
| - GP                               | 0  | NA   | NA         | NA           | NA                         | NA          | NA    |
| - Surgery/Neurosurgery             | 3  | 1.45 | 0.54, 3.90 | 0.412        | 0.70                       | 0.17, 2.92  | 0.621 |
| - Emergency medicine & ICU         | 2  | 1.86 | 0.56, 6.17 | 0.271        | 0.53                       | 0.04, 6.89  | 0.630 |
| - Cancer                           | 0  | NA   | NA         | NA           | NA                         | NA          | NA    |
| - Interns/Residents                | 4  | 2.61 | 1.28, 5.37 | <b>0.014</b> | 0.77                       | 0.26, 2.34  | 0.648 |
| - Paediatrics                      | 0  | NA   | NA         | NA           | NA                         | NA          | NA    |
| - Psychiatry                       | 0  | NA   | NA         | NA           | NA                         | NA          | NA    |
| - Mixed                            | 4  | 1.09 | 0.74, 1.60 | 0.622        | 0.99                       | 0.78, 1.26  | 0.947 |
| - Neurology                        | 0  | NA   | NA         | NA           | NA                         | NA          | NA    |
| - Other                            | 0  | NA   | NA         | NA           | NA                         | NA          | NA    |
| <i>Working Experience:</i>         |    |      |            |              |                            |             |       |
| - Experienced (> 6 yrs.)           | 2  | 1    | -          | -            | 1                          | -           | -     |
| - Resident (≤ 6 yrs.)              | 6  | 1.43 | 0.48, 4.26 | 0.478        | NA                         | NA          | NA    |
| - Mixture                          | 4  | 1.11 | 0.35, 3.53 | 0.853        | NA                         | NA          | NA    |
| <i>Burnout measure:</i>            |    |      |            |              |                            |             |       |
| - MBI                              | 14 | 1    | -          | -            | 1                          | -           | -     |
| - Mixed/other                      | 0  | NA   | NA         | NA           | NA                         | NA          | NA    |
| <b>NOS Quality assessment</b>      |    |      |            |              |                            |             |       |
| <i>Risk of Bias:</i>               |    |      |            |              |                            |             |       |
| - Low                              | 2  | 1    | -          | -            | 1                          | -           | -     |
| - Medium                           | 5  | 2.18 | 0.87, 5.47 | <b>0.088</b> | 1.70                       | 0.33, 8.76  | 0.533 |
| - High                             | 7  | 0.78 | 0.36, 1.70 | 0.498        | NA                         | NA          | NA    |
| <b>Model fit indices</b>           |    |      |            |              | $\chi^2 = 39.53, P=0.7646$ |             |       |
| <b>Personal Accomplishment</b>     |    |      |            |              |                            |             |       |
| <i>Region:</i>                     |    |      |            |              |                            |             |       |
| - US                               | 7  | 1    | -          | -            | 1                          | -           | -     |
| - UK/EU                            | 4  | 1.43 | 0.94, 2.18 | <b>0.083</b> | 1.07                       | 0.39, 2.92  | 0.893 |
| - Commonwealth                     | 0  | NA   | NA         | NA           | NA                         | NA          | NA    |
| - Southeast Asia/Other             | 3  | 1.34 | 0.82, 2.18 | 0.225        | 1.07                       | 0.44, 2.59  | 0.877 |
| <i>Setting:</i>                    |    |      |            |              |                            |             |       |
| - Primary Care                     | 0  | 1    | -          | -            | 1                          | -           | -     |
| - Hospital                         | 12 | NA   | NA         | NA           | NA                         | NA          | NA    |
| - Mixed                            | 2  | 0.86 | 0.70, 1.04 | 0.113        | NA                         | NA          | NA    |
| <i>Design:</i>                     |    |      |            |              |                            |             |       |
| - Cross-sectional                  | 9  | 1    | -          | -            | 1                          | -           | -     |

|                                    |    |      |            |              |                           |            |       |
|------------------------------------|----|------|------------|--------------|---------------------------|------------|-------|
| - Prospective cohort/Longitudinal  | 5  | 1.75 | 1.23, 2.48 | <b>0.004</b> | 1.39                      | 0.61, 3.22 | 0.434 |
| <i>Age:</i>                        |    |      |            |              |                           |            |       |
| - 31 to ≤ 50 yrs.                  | 4  | 1    | -          | -            | 1                         | -          | -     |
| - 20 to ≤ 30 yrs.                  | 5  | 1.36 | 0.93, 1.97 | <b>0.097</b> | 1.27                      | 0.64, 2.53 | 0.492 |
| - > 50 yrs.                        | 2  | 0.70 | 0.55, 0.90 | <b>0.009</b> | 0.81                      | 0.20, 3.25 | 0.771 |
| <i>Gender:</i>                     |    |      |            |              |                           |            |       |
| - Females                          | 2  | 1    | -          | -            | 1                         | -          | -     |
| - Males                            | 9  | 0.79 | 0.44, 1.43 | 0.407        | NA                        | NA         | NA    |
| - Mixed                            | 2  | 1.19 | 0.46, 3.03 | 0.699        | NA                        | NA         | NA    |
| <i>Speciality of professional:</i> |    |      |            |              |                           |            |       |
| - Internal medicine/Physician      | 1  | 1    | -          | -            | 1                         | -          | -     |
| - GP                               | 0  | NA   | NA         | NA           | NA                        | NA         | NA    |
| - Surgery/Neurosurgery             | 3  | 1.22 | 0.64, 2.36 | 0.498        | 1.08                      | 0.44, 2.66 | 0.859 |
| - Emergency medicine & ICU         | 2  | 1.19 | 0.52, 2.72 | 0.648        | 1.09                      | 0.36, 3.32 | 0.873 |
| - Cancer                           | 0  | NA   | NA         | NA           | NA                        | NA         | NA    |
| - Interns/Residents                | 4  | 1.49 | 0.93, 2.39 | <b>0.090</b> | 0.92                      | 0.41, 2.08 | 0.839 |
| - Paediatrics                      | 0  | NA   | NA         | NA           | NA                        | NA         | NA    |
| - Psychiatry                       | 0  | NA   | NA         | NA           | NA                        | NA         | NA    |
| - Mixed                            | 4  | 0.95 | 0.76, 1.19 | 0.605        | 0.91                      | 0.75, 1.13 | 0.400 |
| - Neurology                        | 0  | NA   | NA         | NA           | NA                        | NA         | NA    |
| - Other                            | 0  | NA   | NA         | NA           | NA                        | NA         | NA    |
| <i>Working Experience:</i>         |    |      |            |              |                           |            |       |
| - Experienced (> 6 yrs.)           | 2  | 1    | -          | -            | 1                         | -          | -     |
| - Resident (≤ 6 yrs.)              | 6  | 1.42 | 0.73, 2.77 | 0.263        | NA                        | NA         | NA    |
| - Mixture                          | 4  | 1.20 | 0.60, 2.39 | 0.570        | NA                        | NA         | NA    |
| <i>Burnout measure:</i>            |    |      |            |              |                           |            |       |
| - MBI                              | 14 | 1    | -          | -            | 1                         | -          | -     |
| - Mixed/other                      | 0  | NA   | NA         | NA           | NA                        | NA         | NA    |
| <b>NOS Quality assessment</b>      |    |      |            |              |                           |            |       |
| <i>Risk of Bias:</i>               |    |      |            |              |                           |            |       |
| - Low                              | 2  | 1    | -          | -            | 1                         | -          | -     |
| - Medium                           | 5  | 1.14 | 0.54, 2.39 | 0.700        | NA                        | NA         | NA    |
| - High                             | 7  | 0.82 | 0.44, 1.54 | 0.505        | NA                        | NA         | NA    |
| <b>Model fit indices</b>           |    |      |            |              | $\chi^2 = 11.87, P=0.294$ |            |       |

**Professionalism:**

**Univariable and multivariable meta-regression analysis for association of physician burnout and Professionalism**

| Variable                           | No. of studies | Univariable |             |               | Multivariable |            |               |
|------------------------------------|----------------|-------------|-------------|---------------|---------------|------------|---------------|
|                                    |                | OR          | 95% CI      | P-value       | OR            | 95% CI     | P-value       |
| <b>Burnout</b>                     |                |             |             |               |               |            |               |
| <i>Region:</i>                     |                |             |             |               |               |            |               |
| - US                               | 20             | 1           | -           | -             | 1             | -          | -             |
| - UK/EU                            | 13             | 1.36        | 0.87, 2.16  | 0.171         | 1.26          | 0.76, 2.05 | 0.372         |
| - Commonwealth                     | 1              | 1.90        | 0.35, 10.28 | 0.453         | 1.42          | 0.29, 6.96 | 0.660         |
| - Southeast Asia/Other             | 6              | 1.68        | 0.94, 2.97  | <b>0.076</b>  | 1.04          | 0.63, 1.75 | 0.864         |
| <i>Setting:</i>                    |                |             |             |               |               |            |               |
| - Primary Care                     | 12             | 1           | -           | -             | 1             | -          | -             |
| - Hospital                         | 23             | 2.16        | 1.46, 3.19  | <b>0.0002</b> | 3.82          | 1.84, 8.00 | <b>0.0003</b> |
| - Mixed                            | 5              | 1.42        | 0.83, 2.44  | 0.195         | 1.58          | 0.90, 2.80 | 0.112         |
| <i>Design:</i>                     |                |             |             |               |               |            |               |
| - Cross-sectional                  | 35             | 1           | -           | -             | 1             | -          | -             |
| - Prospective cohort/Longitudinal  | 5              | 0.57        | 0.30, 1.07  | 0.082         | NA            | NA         | NA            |
| <i>Age:</i>                        |                |             |             |               |               |            |               |
| - 31 to ≤ 50 yrs.                  | 18             | 1           | -           | -             | 1             | -          | -             |
| - 20 to ≤ 30 yrs.                  | 9              | 1.09        | 0.67, 1.79  | 0.708         | 0.70          | 0.41, 1.21 | 0.201         |
| - > 50 yrs.                        | 4              | 0.36        | 0.19, 0.69  | <b>0.003</b>  | 0.45          | 0.26, 0.76 | <b>0.003</b>  |
| <i>Gender:</i>                     |                |             |             |               |               |            |               |
| - Females                          | 14             | 1           | -           | -             | 1             | -          | -             |
| - Males                            | 26             | 1.35        | 0.87, 2.12  | 0.174         | NA            | NA         | NA            |
| - Mixed                            | 0              | NA          | NA          | NA            | NA            | NA         | NA            |
| <i>Speciality of professional:</i> |                |             |             |               |               |            |               |
| - Internal medicine/Physician      | 12             | 1           | -           | -             | 1             | -          | -             |
| - GP                               | 4              | 1.20        | 0.51, 2.80  | 0.671         | 1.40          | 0.67, 2.94 | 0.370         |
| - Surgery/Neurosurgery             | 3              | 0.94        | 0.39, 2.25  | 0.885         | 0.47          | 0.17, 1.27 | 0.139         |
| - Emergency medicine & ICU         | 4              | 1.48        | 1.01, 2.34  | <b>0.042</b>  | 0.65          | 0.30, 1.39 | 0.265         |
| - Cancer                           | 1              | 0.88        | 0.26, 2.89  | 0.825         | 0.25          | 0.09, 0.74 | <b>0.012</b>  |
| - Interns/Residents                | 3              | 2.16        | 0.78, 6.05  | 0.135         | 0.75          | 0.30, 1.82 | 0.520         |
| - Paediatrics                      | 2              | 2.05        | 0.55, 7.54  | 0.274         | 0.57          | 0.18, 1.80 | 0.339         |
| - Psychiatry                       | 0              | NA          | NA          | NA            | NA            | NA         | NA            |
| - Mixed                            | 7              | 1.72        | 0.98, 2.97  | <b>0.058</b>  | 0.78          | 0.47, 1.30 | 0.339         |
| - Neurology                        | 1              | 0.98        | 0.24, 3.94  | 0.977         | 0.22          | 0.07, 0.73 | <b>0.014</b>  |

|                                    |    |      |             |               |                           |             |              |
|------------------------------------|----|------|-------------|---------------|---------------------------|-------------|--------------|
| - Other                            | 3  | 1.28 | 0.58, 2.83  | 0.535         | 0.38                      | 0.18, 0.78  | <b>0.009</b> |
| <i>Working Experience:</i>         |    |      |             |               |                           |             |              |
| - Experienced (> 6 yrs.)           | 15 | 1    | -           | -             | 1                         | -           | -            |
| - Resident (≤ 6 yrs.)              | 12 | 2.27 | 1.45, 3.60  | <b>0.0006</b> | 1.16                      | 0.58, 2.32  | 0.678        |
| - Mixture                          | 9  | 1.12 | 0.68, 1.82  | 0.646         | 1.01                      | 0.64, 1.62  | 0.952        |
| <i>Burnout measure:</i>            |    |      |             |               |                           |             |              |
| - Burnout (MBI)                    | 9  | 1    | -           | -             | 1                         | -           | -            |
| - Mixed/other                      | 31 | 1.38 | 0.84, 2.23  | 0.195         | NA                        | NA          | NA           |
| <b>NOS Quality assessment</b>      |    |      |             |               |                           |             |              |
| <i>Risk of Bias:</i>               |    |      |             |               |                           |             |              |
| - Low                              | 14 | 1    | -           | -             | 1                         | -           | -            |
| - Medium                           | 11 | 0.76 | 0.45, 1.28  | 0.304         | NA                        | NA          | NA           |
| - High                             | 15 | 1.27 | 0.44, 1.14  | 0.149         | NA                        | NA          | NA           |
| <b>Model fit indices</b>           |    |      |             |               | $\chi^2 = 24.33, P=0.386$ |             |              |
| <b>Emotional Exhaustion</b>        |    |      |             |               |                           |             |              |
| <i>Region:</i>                     |    |      |             |               |                           |             |              |
| - US                               | 6  | 1    | -           | -             | 1                         | -           | -            |
| - UK/EU                            | 6  | 1.13 | 0.36, 3.46  | 0.826         | NA                        | NA          | NA           |
| - Commonwealth                     | 0  | NA   | NA          | NA            | NA                        | NA          | NA           |
| - Southeast Asia/Other             | 4  | 0.86 | 0.25, 3.03  | 0.807         | NA                        | NA          | NA           |
| <i>Setting:</i>                    |    |      |             |               |                           |             |              |
| - Primary Care                     | 4  | 1    | -           | -             | 1                         | -           | -            |
| - Hospital                         | 9  | 2.56 | 0.94, 6.96  | <b>0.064</b>  | 2.44                      | 0.57, 10.38 | 0.228        |
| - Mixed                            | 3  | 1.63 | 0.44, 5.99  | 0.438         | NA                        | NA          | NA           |
| <i>Design:</i>                     |    |      |             |               |                           |             |              |
| - Cross-sectional                  | 15 | 1    | -           | -             | 1                         | -           | -            |
| - Prospective cohort/Longitudinal  | 1  | 0.60 | 0.09, 4.18  | 0.585         | NA                        | NA          | NA           |
| <i>Age:</i>                        |    |      |             |               |                           |             |              |
| - 31 to ≤ 50 yrs.                  | 2  | 1    | -           | -             | 1                         | -           | -            |
| - 20 to ≤ 30 yrs.                  | 7  | 2.72 | 0.57, 12.94 | 0.189         | NA                        | NA          | NA           |
| - > 50 yrs.                        | 1  | 0.76 | 0.12, 4.71  | 0.754         | NA                        | NA          | NA           |
| <i>Gender:</i>                     |    |      |             |               |                           |             |              |
| - Females                          | 5  | 1    | -           | -             | 1                         | -           | -            |
| - Males                            | 9  | 0.99 | 0.33, 2.94  | 0.980         | NA                        | NA          | NA           |
| - Mixed                            | 0  | NA   | NA          | NA            | NA                        | NA          | NA           |
| <i>Speciality of professional:</i> |    |      |             |               |                           |             |              |
| - Internal medicine/Physician      | 3  | 1    | -           | -             | 1                         | -           | -            |
| - GP                               | 2  | 1.00 | 0.26, 3.82  | 0.998         | 0.67                      | 0.21, 2.16  | 0.502        |
| - Surgery/Neurosurgery             | 1  | 1.34 | 0.61, 2.94  | 0.417         | 0.57                      | 0.12, 2.59  | 0.466        |

|                                   |    |       |             |              |                           |             |              |
|-----------------------------------|----|-------|-------------|--------------|---------------------------|-------------|--------------|
| - Emergency medicine & ICU        | 1  | 11.59 | 1.65, 81.45 | <b>0.020</b> | 4.95                      | 0.72, 33.78 | 0.105        |
| - Cancer                          | 1  | 1.38  | 0.44, 4.26  | 0.533        | 0.58                      | 0.12, 2.92  | 0.514        |
| - Interns/Residents               | 1  | 5.37  | 0.96, 30.27 | <b>0.055</b> | 1.82                      | 0.33, 10.18 | 0.494        |
| - Paediatrics                     | 1  | 4.85  | 0.44, 52.46 | 0.167        | 0.49                      | 0.04, 6.11  | 0.577        |
| - Psychiatry                      | 0  | NA    | NA          | NA           | NA                        | NA          | NA           |
| - Mixed                           | 5  | 2.89  | 1.48, 5.64  | <b>0.006</b> | 1.38                      | 0.44, 4.39  | 0.581        |
| - Neurology                       | 0  | NA    | NA          | NA           | NA                        | NA          | NA           |
| - Other                           | 1  | 0.51  | 0.12, 2.25  | 0.323        | 0.19                      | 0.02, 1.92  | 0.160        |
| <i>Working Experience:</i>        |    |       |             |              |                           |             |              |
| - Experienced (> 6 yrs.)          | 5  | 1     | -           | -            | 1                         | -           | -            |
| - Resident (≤ 6 yrs.)             | 4  | 2.75  | 1.11, 6.89  | <b>0.032</b> | 1.26                      | 0.45, 3.53  | 0.665        |
| - Mixture                         | 3  | 2.41  | 0.69, 8.33  | 0.152        | 4.22                      | 1.31, 13.46 | <b>0.016</b> |
| <i>Burnout measure:</i>           |    |       |             |              |                           |             |              |
| - MBI                             | 16 | 1     | -           | -            | 1                         | -           | -            |
| - Mixed/other                     | 0  | NA    | NA          | NA           | NA                        | NA          | NA           |
| <b>NOS Quality assessment</b>     |    |       |             |              |                           |             |              |
| <i>Risk of Bias:</i>              |    |       |             |              |                           |             |              |
| - Low                             | 6  | 1     | -           | -            | 1                         | -           | -            |
| - Medium                          | 4  | 1.30  | 0.36, 4.76  | 0.669        | NA                        | NA          | NA           |
| - High                            | 6  | 1.35  | 0.44, 4.10  | 0.575        | NA                        | NA          | NA           |
| <b>Model fit indices</b>          |    |       |             |              | $\chi^2 = 2.744, P=0.602$ |             |              |
| <b>Depersonalization</b>          |    |       |             |              |                           |             |              |
| <i>Region:</i>                    |    |       |             |              |                           |             |              |
| - US                              | 5  | 1     | -           | -            | 1                         | -           | -            |
| - UK/EU                           | 4  | 1.92  | 0.62, 5.93  | 0.230        | NA                        | NA          | NA           |
| - Commonwealth                    | 0  | NA    | NA          | NA           | NA                        | NA          | NA           |
| - Southeast Asia/Other            | 3  | 2.48  | 0.70, 8.76  | 0.139        | NA                        | NA          | NA           |
| <i>Setting:</i>                   |    |       |             |              |                           |             |              |
| - Primary Care                    | 2  | 1     | -           | -            | 1                         | -           | -            |
| - Hospital                        | 7  | 2.66  | 0.71, 9.87  | 0.131        | NA                        | NA          | NA           |
| - Mixed                           | 3  | 1.27  | 0.26, 6.23  | 0.744        | NA                        | NA          | NA           |
| <i>Design:</i>                    |    |       |             |              |                           |             |              |
| - Cross-sectional                 | 12 | 1     | -           | -            | 1                         | -           | -            |
| - Prospective cohort/Longitudinal | 0  | NA    | NA          | NA           | NA                        | NA          | NA           |
| <i>Age:</i>                       |    |       |             |              |                           |             |              |
| - 31 to ≤ 50 yrs.                 | 6  | 1     | -           | -            | 1                         | -           | -            |
| - 20 to ≤ 30 yrs.                 | 2  | 1.31  | 0.30, 5.64  | 0.694        | NA                        | NA          | NA           |
| - > 50 yrs.                       | 2  | 1.01  | 0.29, 3.53  | 0.982        | NA                        | NA          | NA           |
| <i>Gender:</i>                    |    |       |             |              |                           |             |              |

|                                    |    |      |             |              |      |                           |              |
|------------------------------------|----|------|-------------|--------------|------|---------------------------|--------------|
| - Females                          | 4  | 1    | -           | -            | 1    | -                         | -            |
| - Males                            | 7  | 1.58 | 0.48, 5.26  | 0.419        | NA   | NA                        | NA           |
| - Mixed                            | 0  | NA   | NA          | NA           | NA   | NA                        | NA           |
| <i>Speciality of professional:</i> |    |      |             |              |      |                           |              |
| - Internal medicine/Physician      | 2  | 1    | -           | -            | 1    | -                         | -            |
| - GP                               | 0  | NA   | NA          | NA           | NA   | NA                        | NA           |
| - Surgery/Neurosurgery             | 1  | 0.85 | 0.27, 2.66  | 0.746        | 0.74 | 0.23, 2.44                | 0.622        |
| - Emergency medicine & ICU         | 1  | 4.95 | 0.60, 40.85 | 0.117        | 5.42 | 1.02, 29.08               | <b>0.047</b> |
| - Cancer                           | 1  | 1.04 | 0.24, 4.53  | 0.956        | 1.14 | 0.28, 4.71                | 0.853        |
| - Interns/Residents                | 1  | 3.19 | 0.40, 25.28 | 0.228        | 3.78 | 0.41, 34.47               | 0.237        |
| - Paediatrics                      | 1  | 1.08 | 0.08, 15.49 | 0.942        | 0.32 | 0.03, 3.46                | 0.349        |
| - Psychiatry                       | 0  | NA   | NA          | NA           | NA   | NA                        | NA           |
| - Mixed                            | 1  | 3.16 | 1.08, 9.21  | <b>0.038</b> | 4.66 | 1.05, 20.91               | <b>0.043</b> |
| - Neurology                        | 0  | NA   | NA          | NA           | NA   | NA                        | NA           |
| - Other                            | 0  | NA   | NA          | NA           | NA   | NA                        | NA           |
| <i>Working Experience:</i>         |    |      |             |              |      |                           |              |
| - Experienced (> 6 yrs.)           | 6  | 1    | -           | -            | 1    | -                         | -            |
| - Resident (≤ 6 yrs.)              | 4  | 2.97 | 0.94, 9.49  | <b>0.061</b> | 0.92 | 0.21, 3.97                | 0.919        |
| - Mixture                          | 2  | 1.57 | 0.29, 8.41  | 0.564        | 3.71 | 0.61, 22.87               | 0.157        |
| <i>Burnout measure:</i>            |    |      |             |              |      |                           |              |
| - MBI                              | 12 | 1    | -           | -            | 1    | -                         | -            |
| - Mixed/other                      | 0  | NA   | NA          | NA           | NA   | NA                        | NA           |
| <b>NOS Quality assessment</b>      |    |      |             |              |      |                           |              |
| <i>Risk of Bias:</i>               |    |      |             |              |      |                           |              |
| - Low                              | 4  | 1    | -           | -            | 1    | -                         | -            |
| - Medium                           | 3  | 0.83 | 0.19, 3.56  | 0.776        | NA   | NA                        | NA           |
| - High                             | 5  | 1.27 | 0.36, 4.48  | 0.682        | NA   | NA                        | NA           |
| <b>Model fit indices</b>           |    |      |             |              |      | $\chi^2 = 7.138, P=0.129$ |              |



**Turnover intention:**

**Univariable and multivariable meta-regression analysis for association of physician burnout and Turnover intention**

| Variable                           | No. of studies | Univariable |             |         | Multivariable |        |         |
|------------------------------------|----------------|-------------|-------------|---------|---------------|--------|---------|
|                                    |                | OR          | 95% CI      | P-value | OR            | 95% CI | P-value |
| <b>Burnout</b>                     |                |             |             |         |               |        |         |
| <i>Region:</i>                     |                |             |             |         |               |        |         |
| - US                               | 13             | 1           | -           | -       | 1             | -      | -       |
| - UK/EU                            | 5              | 0.66        | 0.14, 3.10  | 0.588   | NA            | NA     | NA      |
| - Commonwealth                     | 0              | NA          | NA          | NA      | NA            | NA     | NA      |
| - Southeast Asia/Other             | 7              | 0.96        | 0.25, 3.67  | 0.948   | NA            | NA     | NA      |
| <i>Setting:</i>                    |                |             |             |         |               |        |         |
| - Primary Care                     | 4              | 1           | -           | -       | 1             | -      | -       |
| - Hospital                         | 14             | 0.98        | 0.20, 4.76  | 0.983   | NA            | NA     | NA      |
| - Mixed                            | 7              | 1.97        | 0.34, 11.36 | 0.429   | NA            | NA     | NA      |
| <i>Design:</i>                     |                |             |             |         |               |        |         |
| - Cross-sectional                  | 21             | 1           | -           | -       | 1             | -      | -       |
| - Prospective cohort/Longitudinal  | 4              | 0.98        | 0.21, 4.57  | 0.979   | NA            | NA     | NA      |
| <i>Age:</i>                        |                |             |             |         |               |        |         |
| - 31 to ≤ 50 yrs.                  | 11             | 1           | -           | -       | 1             | -      | -       |
| - 20 to ≤ 30 yrs.                  | 3              | 1.09        | 0.18, 6.75  | 0.924   | NA            | NA     | NA      |
| - > 50 yrs.                        | 6              | 0.43        | 0.10, 1.86  | 0.246   | NA            | NA     | NA      |
| <i>Gender:</i>                     |                |             |             |         |               |        |         |
| - Females                          | 4              | 1           | -           | -       | 1             | -      | -       |
| - Males                            | 19             | 0.46        | 0.09, 2.34  | 0.333   | NA            | NA     | NA      |
| - Mixed                            | 1              | 0.44        | 0.02, 11.25 | 0.607   | NA            | NA     | NA      |
| <i>Speciality of professional:</i> |                |             |             |         |               |        |         |
| - Internal medicine/Physician      | 6              | 1           | -           | -       | 1             | -      | -       |
| - GP                               | 2              | 0.68        | 0.07, 6.96  | 0.730   | NA            | NA     | NA      |
| - Surgery/Neurosurgery             | 6              | 0.34        | 0.06, 1.93  | 0.209   | NA            | NA     | NA      |
| - Emergency medicine & ICU         | 4              | 1.39        | 0.22, 8.94  | 0.713   | NA            | NA     | NA      |
| - Cancer                           | 1              | 0.57        | 0.03, 11.94 | 0.704   | NA            | NA     | NA      |
| - Interns/Residents                | 0              | NA          | NA          | NA      | NA            | NA     | NA      |
| - Paediatrics                      | 0              | NA          | NA          | NA      | NA            | NA     | NA      |
| - Psychiatry                       | 0              | NA          | NA          | NA      | NA            | NA     | NA      |
| - Mixed                            | 6              | 0.51        | 0.10, 2.53  | 0.393   | NA            | NA     | NA      |
| - Neurology                        | 0              | NA          | NA          | NA      | NA            | NA     | NA      |

|                                    |    |      |             |       |    |    |    |
|------------------------------------|----|------|-------------|-------|----|----|----|
| - Other                            | 0  | NA   | NA          | NA    | NA | NA | NA |
| <i>Working Experience:</i>         |    |      |             |       |    |    |    |
| - Experienced (> 6 yrs.)           | 7  | 1    | -           | -     | 1  | -  | -  |
| - Resident (≤ 6 yrs.)              | 5  | 1.58 | 0.29, 8.67  | 0.584 | NA | NA | NA |
| - Mixture                          | 7  | 1.04 | 0.23, 4.76  | 0.959 | NA | NA | NA |
| <i>Burnout measure:</i>            |    |      |             |       |    |    |    |
| - Burnout (MBI)                    | 3  | 1    | -           | -     | 1  | -  | -  |
| - Mixed/other                      | 22 | 0.39 | 0.08, 1.93  | 0.235 | NA | NA | NA |
| <b>NOS Quality assessment</b>      |    |      |             |       |    |    |    |
| <i>Risk of Bias:</i>               |    |      |             |       |    |    |    |
| - Low                              | 8  | 1    | -           | -     | 1  | -  | -  |
| - Medium                           | 7  | 1.52 | 0.35, 6.55  | 0.554 | NA | NA | NA |
| - High                             | 10 | 2.48 | 0.67, 9.21  | 0.164 | NA | NA | NA |
| <b>Model fit indices</b>           |    |      |             |       |    | NA |    |
| <b>Emotional Exhaustion</b>        |    |      |             |       |    |    |    |
| <i>Region:</i>                     |    |      |             |       |    |    |    |
| - US                               | 5  | 1    | -           | -     | 1  | -  | -  |
| - UK/EU                            | 6  | 0.65 | 0.17, 2.53  | 0.511 | NA | NA | NA |
| - Commonwealth                     | 2  | 2.36 | 0.23, 24.29 | 0.440 | NA | NA | NA |
| - Southeast Asia/Other             | 3  | 0.58 | 0.10, 3.39  | 0.520 | NA | NA | NA |
| <i>Setting:</i>                    |    |      |             |       |    |    |    |
| - Primary Care                     | 4  | 1    | -           | -     | 1  | -  | -  |
| - Hospital                         | 8  | 1.95 | 0.51, 7.46  | 0.301 | NA | NA | NA |
| - Mixed                            | 4  | 0.88 | 0.19, 4.18  | 0.863 | NA | NA | NA |
| <i>Design:</i>                     |    |      |             |       |    |    |    |
| - Cross-sectional                  | 16 | 1    | -           | -     | 1  | -  | -  |
| - Prospective cohort/Longitudinal  | 0  | NA   | NA          | NA    | NA | NA | NA |
| <i>Age:</i>                        |    |      |             |       |    |    |    |
| - 31 to ≤ 50 yrs.                  | 9  | 1    | -           | -     | 1  | -  | -  |
| - 20 to ≤ 30 yrs.                  | 3  | 0.50 | 0.11, 2.27  | 0.340 | NA | NA | NA |
| - > 50 yrs.                        | 3  | 2.36 | 0.50, 11.13 | 0.259 | NA | NA | NA |
| <i>Gender:</i>                     |    |      |             |       |    |    |    |
| - Females                          | 5  | 1    | -           | -     | 1  | -  | -  |
| - Males                            | 11 | 2.03 | 0.62, 6.69  | 0.225 | NA | NA | NA |
| - Mixed                            | 0  | NA   | NA          | NA    | NA | NA | NA |
| <i>Speciality of professional:</i> |    |      |             |       |    |    |    |
| - Internal medicine/Physician      | 3  | 1    | -           | -     | 1  | -  | -  |
| - GP                               | 2  | 0.55 | 0.06, 5.05  | 0.567 | NA | NA | NA |
| - Surgery/Neurosurgery             | 4  | 2.05 | 0.41, 10.28 | 0.345 | NA | NA | NA |

|                                   |    |      |             |              |      |            |              |
|-----------------------------------|----|------|-------------|--------------|------|------------|--------------|
| - Emergency medicine & ICU        | 0  | NA   | NA          | NA           | NA   | NA         | NA           |
| - Cancer                          | 1  | 0.65 | 0.04, 10.59 | 0.743        | NA   | NA         | NA           |
| - Interns/Residents               | 0  | NA   | NA          | NA           | NA   | NA         | NA           |
| - Paediatrics                     | 0  | NA   | NA          | NA           | NA   | NA         | NA           |
| - Psychiatry                      | 0  | NA   | NA          | NA           | NA   | NA         | NA           |
| - Mixed                           | 4  | 0.60 | 0.12, 3.06  | 0.511        | NA   | NA         | NA           |
| - Neurology                       | 0  | NA   | NA          | NA           | NA   | NA         | NA           |
| - Other                           | 2  | 0.90 | 0.11, 7.54  | 0.912        | NA   | NA         | NA           |
| <i>Working Experience:</i>        |    |      |             |              |      |            |              |
| - Experienced (> 6 yrs.)          | 7  | 1    | -           | -            | 1    | -          | -            |
| - Resident (≤ 6 yrs.)             | 5  | 1.88 | 0.45, 7.85  | 0.357        | NA   | NA         | NA           |
| - Mixture                         | 2  | 0.48 | 0.08, 2.92  | 0.395        | NA   | NA         | NA           |
| <i>Burnout measure:</i>           |    |      |             |              |      |            |              |
| - MBI                             | 14 | 1    | -           | -            | 1    | -          | -            |
| - Mixed/other                     | 2  | 0.74 | 0.12, 4.39  | 0.725        | NA   | NA         | NA           |
| <b>NOS Quality assessment</b>     |    |      |             |              |      |            |              |
| <i>Risk of Bias:</i>              |    |      |             |              |      |            |              |
| - Low                             | 6  | 1    | -           | -            | 1    | -          | -            |
| - Medium                          | 4  | 0.38 | 0.10, 1.48  | 0.149        | NA   | NA         | NA           |
| - High                            | 6  | 0.43 | 0.13, 1.42  | 0.152        | NA   | NA         | NA           |
| <b>Model fit indices</b>          |    |      |             |              |      | NA         |              |
| <b>Depersonalization</b>          |    |      |             |              |      |            |              |
| <i>Region:</i>                    |    |      |             |              |      |            |              |
| - US                              | 4  | 1    | -           | -            | 1    | -          | -            |
| - UK/EU                           | 5  | 0.42 | 0.26, 0.70  | <b>0.004</b> | 0.59 | 0.37, 0.95 | <b>0.030</b> |
| - Commonwealth                    | 0  | NA   | NA          | NA           | NA   | NA         | NA           |
| - Southeast Asia/Other            | 2  | 0.53 | 0.25, 1.11  | <b>0.082</b> | 0.84 | 0.34, 2.10 | 0.708        |
| <i>Setting:</i>                   |    |      |             |              |      |            |              |
| - Primary Care                    | 3  | 1    | -           | -            | 1    | -          | -            |
| - Hospital                        | 6  | 1.27 | 0.70, 2.29  | 0.376        | 1.13 | 0.67, 1.90 | 0.654        |
| - Mixed                           | 2  | 0.53 | 0.33, 0.85  | <b>0.015</b> | 1.09 | 0.27, 4.53 | 0.900        |
| <i>Design:</i>                    |    |      |             |              |      |            |              |
| - Cross-sectional                 | 11 | 1    | -           | -            | 1    | -          | -            |
| - Prospective cohort/Longitudinal | 0  | NA   | NA          | NA           | NA   | NA         | NA           |
| <i>Age:</i>                       |    |      |             |              |      |            |              |
| - 31 to ≤ 50 yrs.                 | 5  | 1    | -           | -            | 1    | -          | -            |
| - 20 to ≤ 30 yrs.                 | 2  | 0.90 | 0.28, 2.89  | 0.840        | NA   | NA         | NA           |
| - > 50 yrs.                       | 1  | 2.17 | 0.64, 7.39  | 0.177        | NA   | NA         | NA           |
| <i>Gender:</i>                    |    |      |             |              |      |            |              |

|                                    |    |      |             |              |      |                              |       |
|------------------------------------|----|------|-------------|--------------|------|------------------------------|-------|
| - Females                          | 3  | 1    | -           | -            | 1    | -                            | -     |
| - Males                            | 8  | 2.05 | 1.16, 3.63  | <b>0.019</b> | 1.49 | 0.47, 4.66                   | 0.498 |
| - Mixed                            | 0  | NA   | NA          | NA           | NA   | NA                           | NA    |
| <i>Speciality of professional:</i> |    |      |             |              |      |                              |       |
| - Internal medicine/Physician      | 2  | 1    | -           | -            | 1    | -                            | -     |
| - GP                               | 1  | 0.61 | 0.14, 2.66  | 0.442        | 0.42 | 0.12, 1.48                   | 0.174 |
| - Surgery/Neurosurgery             | 4  | 1.84 | 0.97, 3.46  | <b>0.058</b> | NA   | NA                           | NA    |
| - Emergency medicine & ICU         | 0  | NA   | NA          | NA           | NA   | NA                           | NA    |
| - Cancer                           | 1  | 0.78 | 0.15, 4.06  | 0.726        | NA   | NA                           | NA    |
| - Interns/Residents                | 0  | NA   | NA          | NA           | NA   | NA                           | NA    |
| - Paediatrics                      | 0  | NA   | NA          | NA           | NA   | NA                           | NA    |
| - Psychiatry                       | 0  | NA   | NA          | NA           | NA   | NA                           | NA    |
| - Mixed                            | 3  | 0.66 | 0.39, 1.13  | 0.726        | 0.80 | 0.41, 1.57                   | 0.520 |
| - Neurology                        | 0  | NA   | NA          | NA           | NA   | NA                           | NA    |
| - Other                            | 0  | NA   | NA          | NA           | NA   | NA                           | NA    |
| <i>Working Experience:</i>         |    |      |             |              |      |                              |       |
| - Experienced (> 6 yrs.)           | 3  | 1    | -           | -            | 1    | -                            | -     |
| - Resident (≤ 6 yrs.)              | 4  | 1.34 | 1.79, 22.20 | 0.440        | NA   | NA                           | NA    |
| - Mixture                          | 2  | 0.64 | 0.27, 1.57  | 0.281        | NA   | NA                           | NA    |
| <i>Burnout measure:</i>            |    |      |             |              |      |                              |       |
| - MBI                              | 11 | 1    | -           | -            | 1    | -                            | -     |
| - Mixed/other                      | 0  | NA   | NA          | NA           | NA   | NA                           | NA    |
| <b>NOS Quality assessment</b>      |    |      |             |              |      |                              |       |
| <i>Risk of Bias:</i>               |    |      |             |              |      |                              |       |
| - Low                              | 5  | 1    | -           | -            | 1    | -                            | -     |
| - Medium                           | 2  | 0.93 | 0.37, 2.34  | 0.867        | NA   | NA                           | NA    |
| - High                             | 4  | 0.61 | 0.26, 1.39  | 0.202        | NA   | NA                           | NA    |
| <b>Model fit indices</b>           |    |      |             |              |      | $\chi^2 = 42.22, P < 0.0001$ |       |

## Appendix 13: Publication Bias and Funnel Plots

Publication bias was only assessed in meta-analysis involving 10 or more studies.

Funnel plot asymmetry was firstly done visually by inspecting the standard error (recommended by Sterne and Egger (2001)) for overall burnout measure only. Then, statistical tests for testing funnel plot asymmetry we done using the classical egger's and the random/mixed effects version of eggers and trim-and-fill method were used as a sensitivity analysis across all subscales (Burnout, EE, DP and PA).

### Career Choice Regret – Overall Burnout:

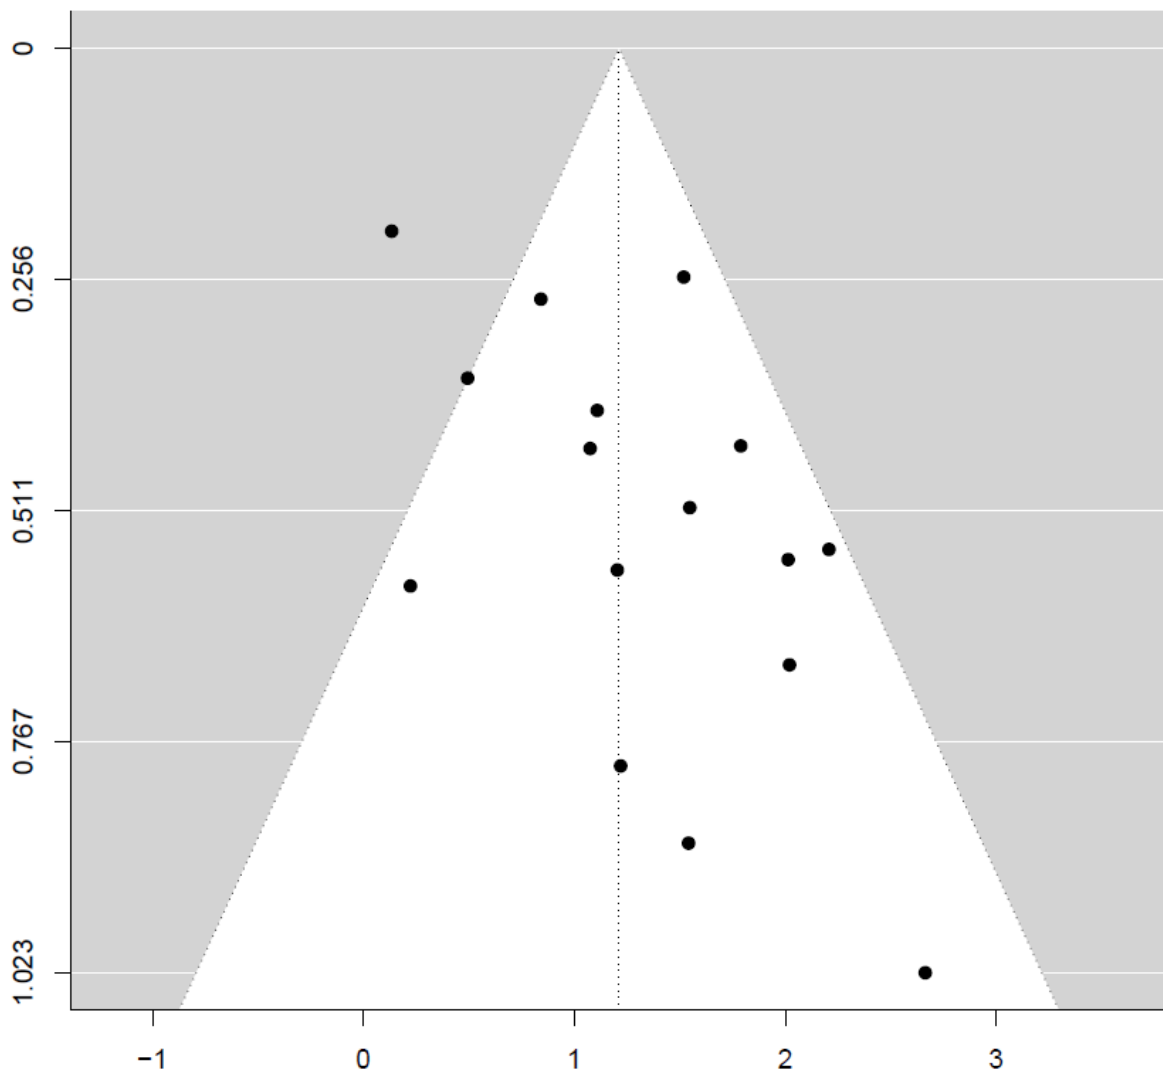

### Classical Egger test

Regression Test for Funnel Plot Asymmetry

Model: weighted regression with multiplicative dispersion

Predictor: standard error

Test for funnel plot asymmetry:  $t = -3.4536$ ,  $df = 14$ ,  $p = 0.0035$

### Random/mixed-effects version of the Egger test

Regression Test for Funnel Plot Asymmetry

Model: mixed-effects meta-regression model

Predictor: standard error

Test for funnel plot asymmetry:  $z = -3.3459$ ,  $p = 0.0008$

### Trim-and-fill analysis

Estimated number of missing studies on the right side: 0 (SE = 2.2305)

Random-Effects Model ( $k = 16$ ;  $\tau^2$  estimator: REML)

$\tau^2$  (estimated amount of total heterogeneity): 1.8434 (SE = 0.7460)

$\tau$  (square root of estimated  $\tau^2$  value): 1.3577

$I^2$  (total heterogeneity / total variability): 92.01%

$H^2$  (total variability / sampling variability): 12.52

Test for Heterogeneity:

$Q (df = 14) = 127.4147$ ,  $p\text{-val} < .0001$

Model Results:

| estimate | se     | zval    | pval   | ci.lb   | ci.ub   |     |
|----------|--------|---------|--------|---------|---------|-----|
| -1.6559  | 0.3529 | -4.6923 | <.0001 | -2.3475 | -0.9642 | *** |

---

Signif. codes: 0 '\*\*\*' 0.001 '\*\*' 0.01 '\*' 0.05 '.' 0.1 ' ' 1

**Job Satisfaction – Overall Burnout:**

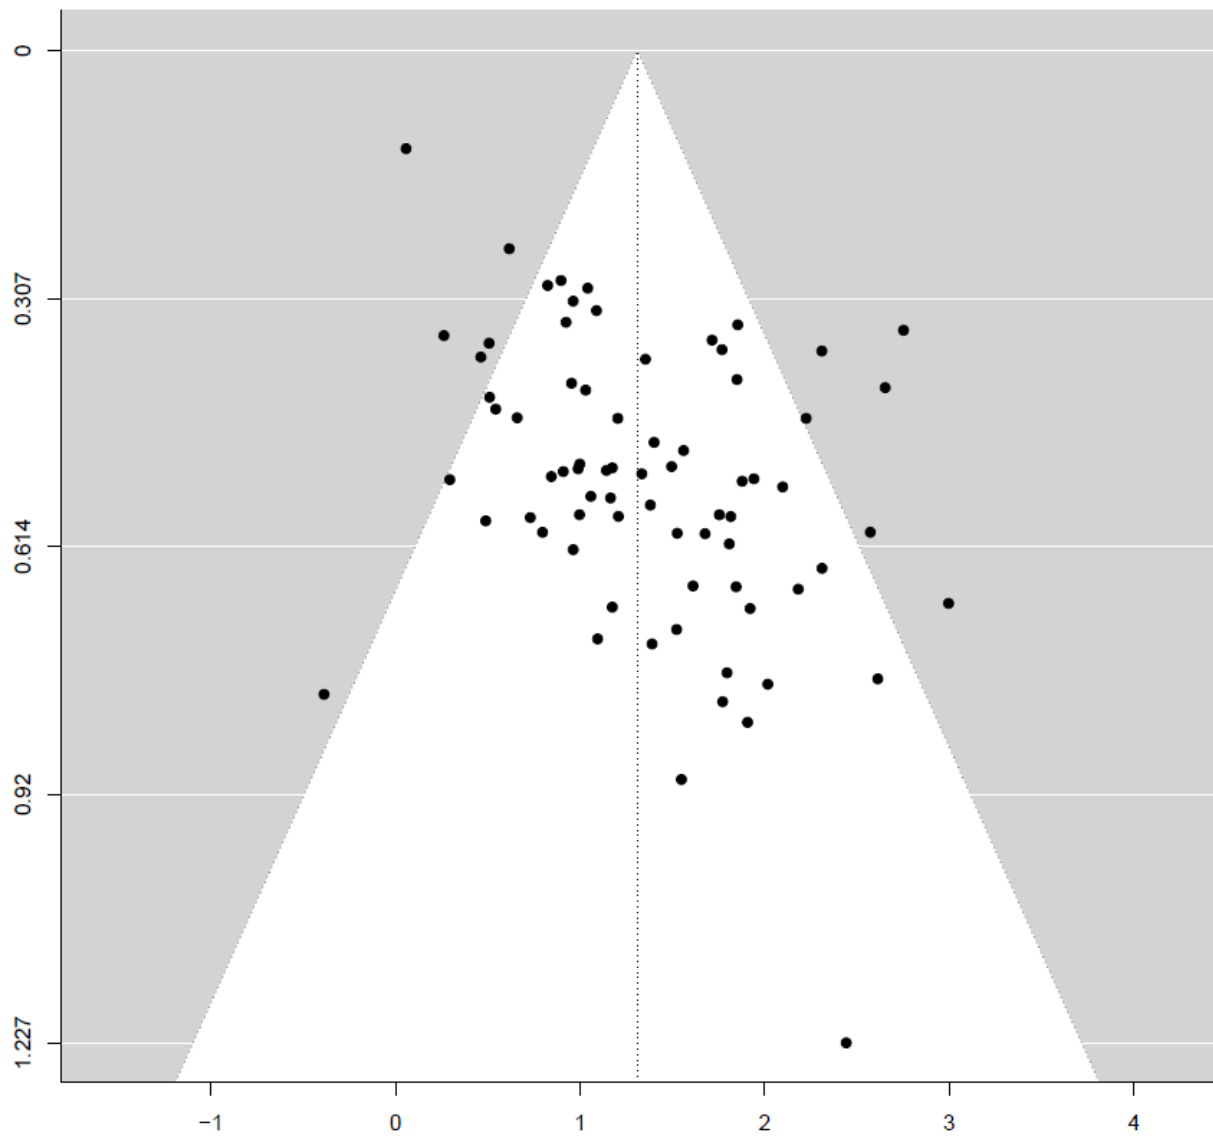

### Classical Egger test

Regression Test for Funnel Plot Asymmetry

Model: weighted regression with multiplicative dispersion

Predictor: standard error

Test for funnel plot asymmetry:  $t = -3.2834$ ,  $df = 71$ ,  $p = 0.0015$

### Random/mixed-effects version of the Egger test

Regression Test for Funnel Plot Asymmetry

Model: mixed-effects meta-regression model

Predictor: standard error

Test for funnel plot asymmetry:  $z = -7.0221$ ,  $p < .0001$

### Trim-and-fill analysis

Estimated number of missing studies on the right side: 0 (SE = NA)

Random-Effects Model ( $k = 73$ ; tau<sup>2</sup> estimator: REML)

Tau<sup>2</sup> (estimated amount of total heterogeneity): 18.1305 (SE = 2.9610)

Tau (square root of estimated tau<sup>2</sup> value): 4.2580

I<sup>2</sup> (total heterogeneity / total variability): 98.95%

H<sup>2</sup> (total variability / sampling variability): 95.38

Test for Heterogeneity:

Q ( $df = 71$ ) = 891.0371,  $p\text{-val} < .0001$

Model Results:

| estimate | se     | zval    | pval   | ci.lb   | ci.ub   |     |
|----------|--------|---------|--------|---------|---------|-----|
| -2.1250  | 0.4839 | -4.3917 | <.0001 | -3.0734 | -1.1766 | *** |

---

Signif. codes: 0 '\*\*\*' 0.001 '\*\*' 0.01 '\*' 0.05 '.' 0.1 ' ' 1



**Patient Safety Incidents – Overall Burnout:**

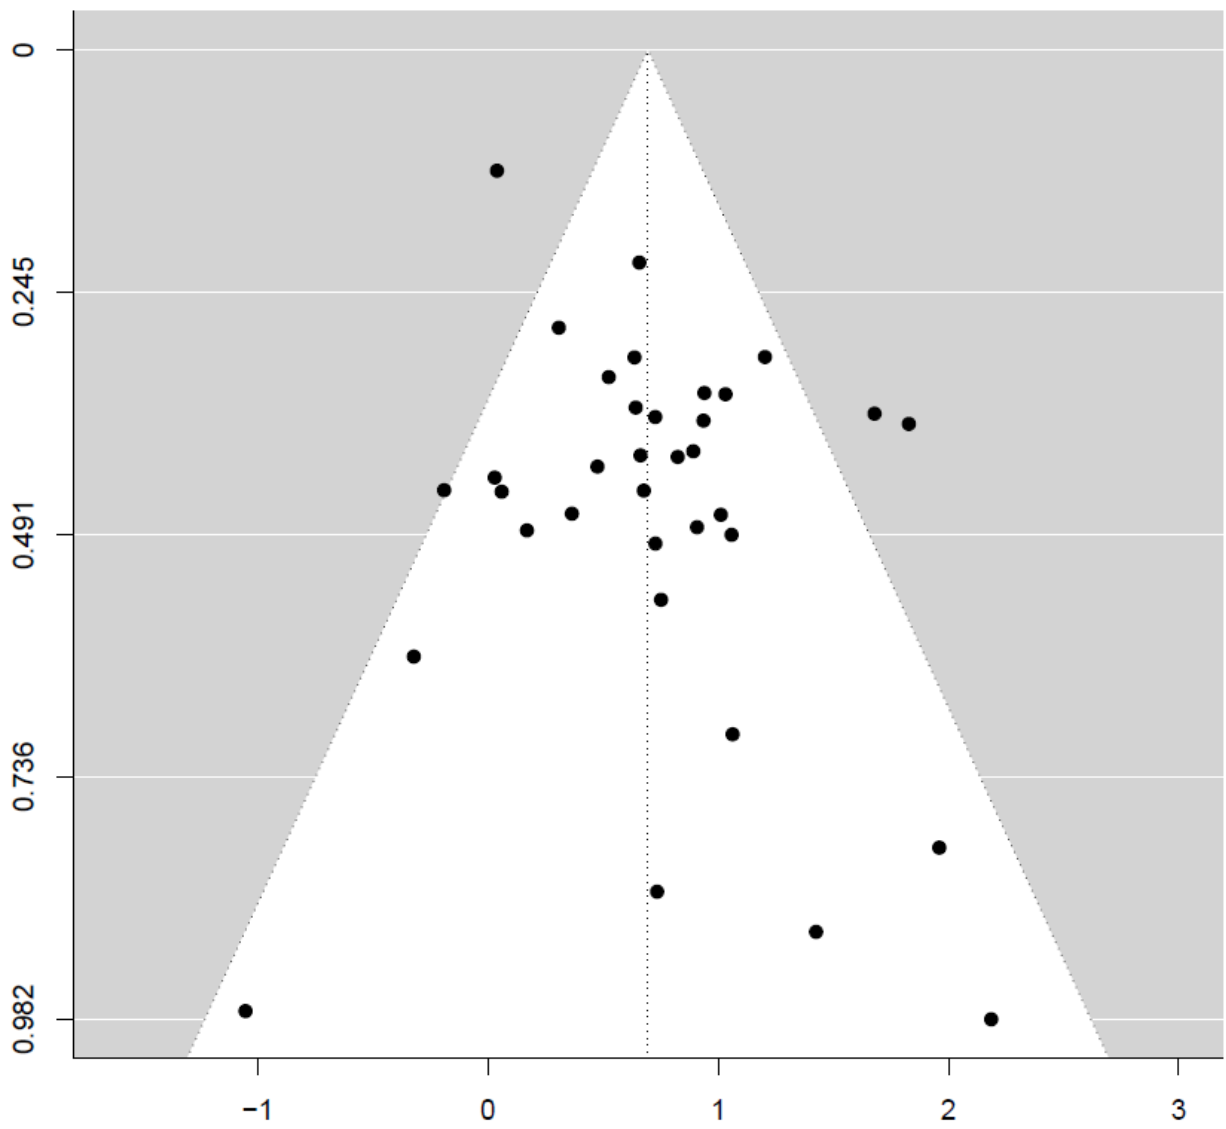

### Classical Egger test

Regression Test for Funnel Plot Asymmetry

Model: weighted regression with multiplicative dispersion

Predictor: standard error

Test for funnel plot asymmetry:  $t = 2.1527$ ,  $df = 33$ ,  $p = 0.0383$

### Random/mixed-effects version of the Egger test

Regression Test for Funnel Plot Asymmetry

Model: mixed-effects meta-regression model

Predictor: standard error

Test for funnel plot asymmetry:  $z = 0.1661$ ,  $p = 0.8680$

### Trim-and-fill analysis

Estimated number of missing studies on the left side: 11 (SE = 3.9342)

Random-Effects Model ( $k = 35$ ; tau<sup>2</sup> estimator: REML)

Tau<sup>2</sup> (estimated amount of total heterogeneity): 0.3773 (SE = 0.1203)

Tau (square root of estimated tau<sup>2</sup> value): 0.6143

I<sup>2</sup> (total heterogeneity / total variability): 71.44%

H<sup>2</sup> (total variability / sampling variability): 3.50

Test for Heterogeneity:

$Q (df = 33) = 151.2212$ ,  $p\text{-val} < .0001$

Model Results:

| estimate | se     | zval   | pval   | ci.lb  | ci.ub  |
|----------|--------|--------|--------|--------|--------|
| 0.4664   | 0.1120 | 4.1639 | <.0001 | 0.2468 | 0.6859 |

---

Signif. codes: 0 '\*\*\*' 0.001 '\*\*' 0.01 '\*' 0.05 '.' 0.1 ' ' 1

Professionalism – Overall Burnout:

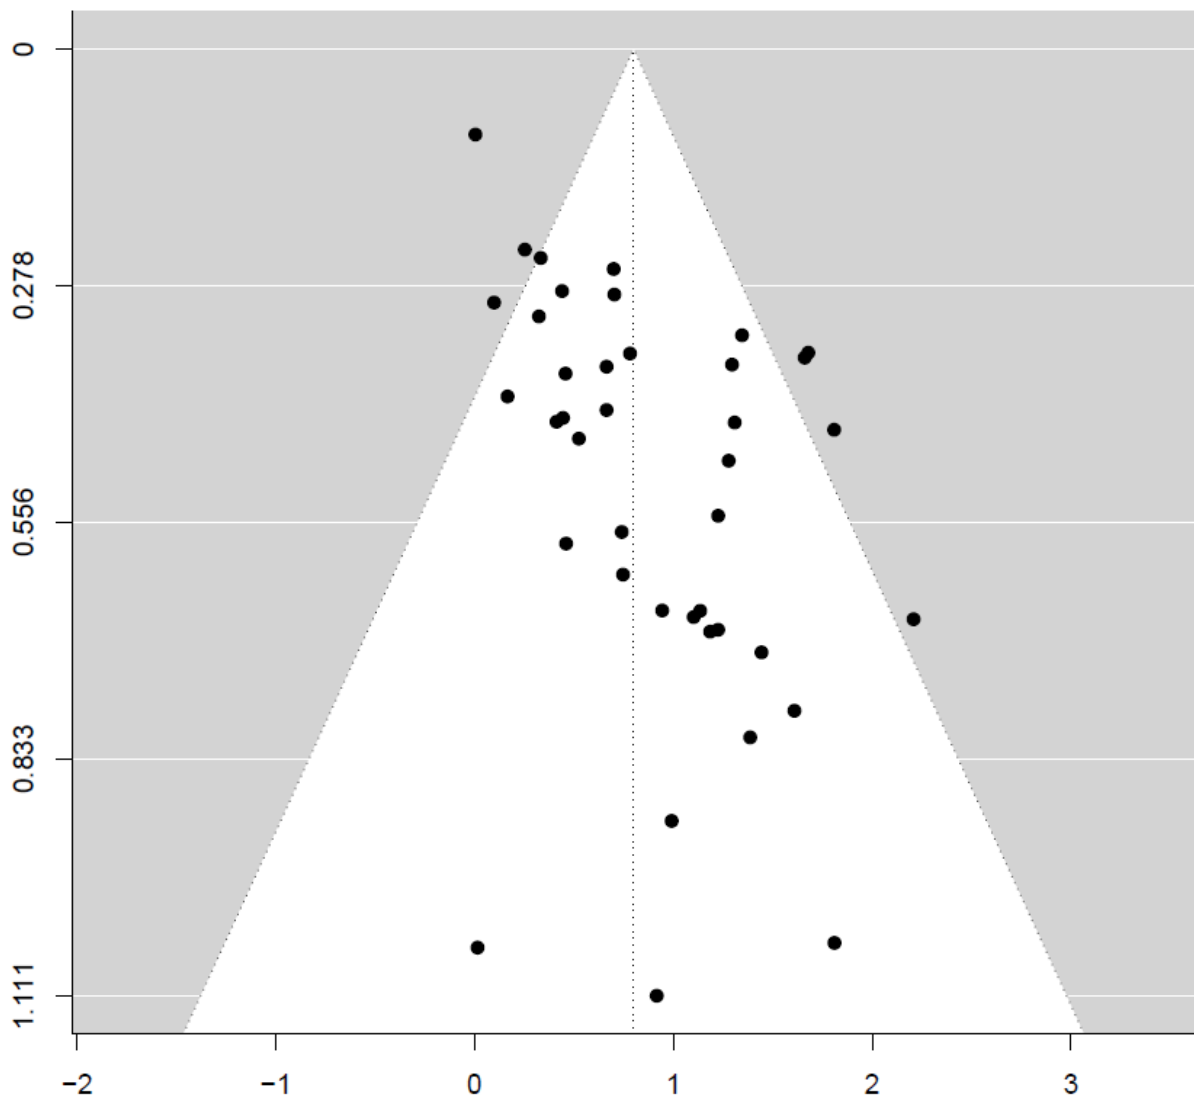

### Classical Egger test

Regression Test for Funnel Plot Asymmetry

Model: weighted regression with multiplicative dispersion

Predictor: standard error

Test for funnel plot asymmetry:  $t = 4.3932$ ,  $df = 38$ ,  $p < .0001$

### Random/mixed-effects version of the Egger test

Regression Test for Funnel Plot Asymmetry

Model: mixed-effects meta-regression model

Predictor: standard error

Test for funnel plot asymmetry:  $z = 2.0250$ ,  $p = 0.0429$

### Trim-and-fill analysis

Estimated number of missing studies on the left side: 10 (SE = 4.3759)

Random-Effects Model ( $k = 40$ ; tau<sup>2</sup> estimator: REML)

Tau<sup>2</sup> (estimated amount of total heterogeneity): 0.4182 (SE = 0.1238)

Tau (square root of estimated tau<sup>2</sup> value): 0.6467

I<sup>2</sup> (total heterogeneity / total variability): 74.69%

H<sup>2</sup> (total variability / sampling variability): 3.95

Test for Heterogeneity:

$Q (df = 38) = 184.1634$ ,  $p\text{-val} < .0001$

Model Results:

| estimate | se     | zval   | pval   | ci.lb  | ci.ub  |
|----------|--------|--------|--------|--------|--------|
| 0.5131   | 0.1105 | 4.6437 | <.0001 | 0.2966 | 0.7297 |

---

Signif. codes: 0 '\*\*\*' 0.001 '\*\*' 0.01 '\*' 0.05 '.' 0.1 ' ' 1

Turnover Intention – Overall Burnout:

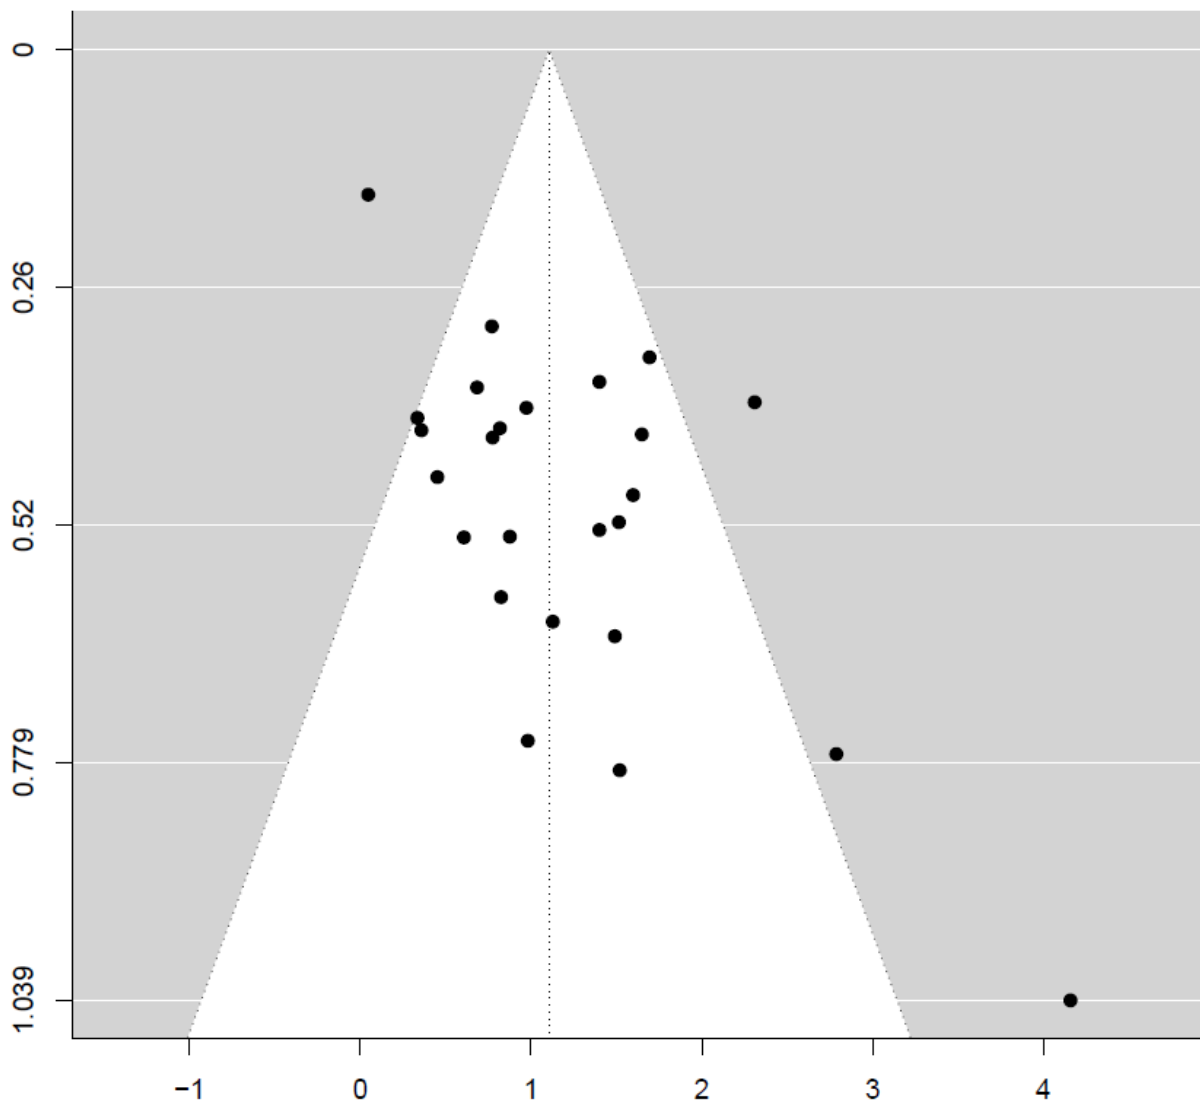

### Classical Egger test

Regression Test for Funnel Plot Asymmetry

Model: weighted regression with multiplicative dispersion

Predictor: standard error

Test for funnel plot asymmetry:  $t = 0.1899$ ,  $df = 23$ ,  $p = 0.4538$

### Random/mixed-effects version of the Egger test

Regression Test for Funnel Plot Asymmetry

Model: mixed-effects meta-regression model

Predictor: standard error

Test for funnel plot asymmetry:  $z = -0.7490$ ,  $p = 0.8417$

### Trim-and-fill analysis

Estimated number of missing studies on the right side: 0 (SE = 2.9031)

Random-Effects Model ( $k = 25$ ;  $\tau^2$  estimator: REML)

$\tau^2$  (estimated amount of total heterogeneity): 1.3563 (SE = 0.4585)

$\tau$  (square root of estimated  $\tau^2$  value): 1.1646

$I^2$  (total heterogeneity / total variability): 88.23%

$H^2$  (total variability / sampling variability): 8.49

Test for Heterogeneity:

$Q (df = 23) = 184.9612$ ,  $p\text{-val} < .0001$

Model Results:

| estimate | se     | zval   | pval          | ci.lb  | ci.ub  |     |
|----------|--------|--------|---------------|--------|--------|-----|
| 0.9176   | 0.2504 | 3.6651 | <b>0.0002</b> | 0.4269 | 1.4083 | *** |

---

Signif. codes: 0 '\*\*\*' 0.001 '\*\*' 0.01 '\*' 0.05 '.' 0.1 ' ' 1
